# Supplementary material for: Chemistry and Tumor Cell Growth Inhibitory Activity of 11,20-Epoxy-3Z,5(6)E-diene Briaranes from the South China Sea Gorgonian Dichotella gemmacea
Source: PubMed Central journal article supplement (PMC3707162; doi:10.3390/md11051565), 2013-05-15

# Supplementary Information

|   |                                                                           |         |
|---|---------------------------------------------------------------------------|---------|
|   | Table of Contents                                                         | P1–P4   |
| 1 | Spectra of the new compound <b>1</b>                                      | P5–P8   |
|   | HR-ESIMS spectrum of the new compound <b>1</b>                            | P5      |
|   | <sup>1</sup> H NMR spectrum of the new compound <b>1</b>                  | P5      |
|   | <sup>13</sup> C NMR spectrum of the new compound <b>1</b>                 | P6      |
|   | DEPT spectrum of the new compound <b>1</b>                                | P6      |
|   | HSQC spectrum of the new compound <b>1</b>                                | P7      |
|   | <sup>1</sup> H- <sup>1</sup> H COSY spectrum of the new compound <b>1</b> | P7      |
|   | HMBC spectrum of the new compound <b>1</b>                                | P8      |
|   | NOESY spectrum of the new compound <b>1</b>                               | P8      |
| 2 | Spectra of the new compound <b>2</b>                                      | P9–P12  |
|   | HR-ESIMS spectrum of the new compound <b>2</b>                            | P9      |
|   | <sup>1</sup> H NMR spectrum of the new compound <b>2</b>                  | P9      |
|   | <sup>13</sup> C NMR spectrum of the new compound <b>2</b>                 | P10     |
|   | DEPT spectrum of the new compound <b>2</b>                                | P10     |
|   | HSQC spectrum of the new compound <b>2</b>                                | P11     |
|   | <sup>1</sup> H- <sup>1</sup> H COSY spectrum of the new compound <b>2</b> | P11     |
|   | HMBC spectrum of the new compound <b>2</b>                                | P12     |
|   | NOESY spectrum of the new compound <b>2</b>                               | P12     |
| 3 | Spectra of the new compound <b>3</b>                                      | P13–P16 |
|   | HR-ESIMS spectrum of the new compound <b>3</b>                            | P13     |
|   | <sup>1</sup> H NMR spectrum of the new compound <b>3</b>                  | P13     |
|   | <sup>13</sup> C NMR spectrum of the new compound <b>3</b>                 | P14     |
|   | DEPT spectrum of the new compound <b>3</b>                                | P14     |
|   | HSQC spectrum of the new compound <b>3</b>                                | P15     |
|   | <sup>1</sup> H- <sup>1</sup> H COSY spectrum of the new compound <b>3</b> | P15     |
|   | HMBC spectrum of the new compound <b>3</b>                                | P16     |
|   | NOESY spectrum of the new compound <b>3</b>                               | P16     |
| 4 | Spectra of the new compound <b>4</b>                                      | P17–P20 |
|   | HR-ESIMS spectrum of the new compound <b>4</b>                            | P17     |
|   | <sup>1</sup> H NMR spectrum of the new compound <b>4</b>                  | P17     |
|   | <sup>13</sup> C NMR spectrum of the new compound <b>4</b>                 | P18     |
|   | DEPT spectrum of the new compound <b>4</b>                                | P18     |
|   | HSQC spectrum of the new compound <b>4</b>                                | P19     |
|   | <sup>1</sup> H- <sup>1</sup> H COSY spectrum of the new compound <b>4</b> | P19     |
|   | HMBC spectrum of the new compound <b>4</b>                                | P20     |
|   | NOESY spectrum of the new compound <b>4</b>                               | P20     |
| 5 | Spectra of the new compound <b>5</b>                                      | P21–P24 |
|   | HR-ESIMS spectrum of the new compound <b>5</b>                            | P21     |
|   | <sup>1</sup> H NMR spectrum of the new compound <b>5</b>                  | P21     |
|   | <sup>13</sup> C NMR spectrum of the new compound <b>5</b>                 | P22     |

|    |                                                                           |         |
|----|---------------------------------------------------------------------------|---------|
|    | DEPT spectrum of the new compound <b>5</b>                                | P22     |
|    | HSQC spectrum of the new compound <b>5</b>                                | P23     |
|    | <sup>1</sup> H- <sup>1</sup> H COSY spectrum of the new compound <b>5</b> | P23     |
|    | HMBC spectrum of the new compound <b>5</b>                                | P24     |
|    | NOESY spectrum of the new compound <b>5</b>                               | P24     |
| 6  | Spectra of the new compound <b>6</b>                                      | P25–P28 |
|    | HR-ESIMS spectrum of the new compound <b>6</b>                            | P25     |
|    | <sup>1</sup> H NMR spectrum of the new compound <b>6</b>                  | P25     |
|    | <sup>13</sup> C NMR spectrum of the new compound <b>6</b>                 | P26     |
|    | DEPT spectrum of the new compound <b>6</b>                                | P26     |
|    | HSQC spectrum of the new compound <b>6</b>                                | P27     |
|    | <sup>1</sup> H- <sup>1</sup> H COSY spectrum of the new compound <b>6</b> | P27     |
|    | HMBC spectrum of the new compound <b>6</b>                                | P28     |
|    | NOESY spectrum of the new compound <b>6</b>                               | P28     |
| 7  | Spectra of the new compound <b>7</b>                                      | P29–P32 |
|    | HR-ESIMS spectrum of the new compound <b>7</b>                            | P29     |
|    | <sup>1</sup> H NMR spectrum of the new compound <b>7</b>                  | P29     |
|    | <sup>13</sup> C NMR spectrum of the new compound <b>7</b>                 | P30     |
|    | DEPT spectrum of the new compound <b>7</b>                                | P30     |
|    | HSQC spectrum of the new compound <b>7</b>                                | P31     |
|    | <sup>1</sup> H- <sup>1</sup> H COSY spectrum of the new compound <b>7</b> | P31     |
|    | HMBC spectrum of the new compound <b>7</b>                                | P32     |
|    | NOESY spectrum of the new compound <b>7</b>                               | P32     |
| 8  | Spectra of the new compound <b>8</b>                                      | P33–P36 |
|    | HR-ESIMS spectrum of the new compound <b>8</b>                            | P33     |
|    | <sup>1</sup> H NMR spectrum of the new compound <b>8</b>                  | P33     |
|    | <sup>13</sup> C NMR spectrum of the new compound <b>8</b>                 | P34     |
|    | DEPT spectrum of the new compound <b>8</b>                                | P34     |
|    | HSQC spectrum of the new compound <b>8</b>                                | P35     |
|    | <sup>1</sup> H- <sup>1</sup> H COSY spectrum of the new compound <b>8</b> | P35     |
|    | HMBC spectrum of the new compound <b>8</b>                                | P36     |
|    | NOESY spectrum of the new compound <b>8</b>                               | P36     |
| 9  | Spectra of the new compound <b>9</b>                                      | P37–P40 |
|    | HR-ESIMS spectrum of the new compound <b>9</b>                            | P37     |
|    | <sup>1</sup> H NMR spectrum of the new compound <b>9</b>                  | P37     |
|    | <sup>13</sup> C NMR spectrum of the new compound <b>9</b>                 | P38     |
|    | DEPT spectrum of the new compound <b>9</b>                                | P38     |
|    | HSQC spectrum of the new compound <b>9</b>                                | P39     |
|    | <sup>1</sup> H- <sup>1</sup> H COSY spectrum of the new compound <b>9</b> | P39     |
|    | HMBC spectrum of the new compound <b>9</b>                                | P40     |
|    | NOESY spectrum of the new compound <b>9</b>                               | P40     |
| 10 | Spectra of the new compound <b>10</b>                                     | P41–P44 |

|    |                                                                            |         |
|----|----------------------------------------------------------------------------|---------|
|    | HR-ESIMS spectrum of the new compound <b>10</b>                            | P41     |
|    | <sup>1</sup> H NMR spectrum of the new compound <b>10</b>                  | P41     |
|    | <sup>13</sup> C NMR spectrum of the new compound <b>10</b>                 | P42     |
|    | DEPT spectrum of the new compound <b>10</b>                                | P42     |
|    | HSQC spectrum of the new compound <b>10</b>                                | P43     |
|    | <sup>1</sup> H- <sup>1</sup> H COSY spectrum of the new compound <b>10</b> | P43     |
|    | HMBC spectrum of the new compound <b>10</b>                                | P44     |
|    | NOESY spectrum of the new compound <b>10</b>                               | P44     |
| 11 | Spectra of the new compound <b>11</b>                                      | P45–P48 |
|    | HR-ESIMS spectrum of the new compound <b>11</b>                            | P45     |
|    | <sup>1</sup> H NMR spectrum of the new compound <b>11</b>                  | P45     |
|    | <sup>13</sup> C NMR spectrum of the new compound <b>11</b>                 | P46     |
|    | DEPT spectrum of the new compound <b>11</b>                                | P46     |
|    | HSQC spectrum of the new compound <b>11</b>                                | P47     |
|    | <sup>1</sup> H- <sup>1</sup> H COSY spectrum of the new compound <b>11</b> | P47     |
|    | HMBC spectrum of the new compound <b>11</b>                                | P48     |
|    | NOESY spectrum of the new compound <b>11</b>                               | P48     |
| 12 | Spectra of the new compound <b>12</b>                                      | P49–P52 |
|    | HR-ESIMS spectrum of the new compound <b>12</b>                            | P49     |
|    | <sup>1</sup> H NMR spectrum of the new compound <b>12</b>                  | P49     |
|    | <sup>13</sup> C NMR spectrum of the new compound <b>12</b>                 | P50     |
|    | DEPT spectrum of the new compound <b>12</b>                                | P50     |
|    | HSQC spectrum of the new compound <b>12</b>                                | P51     |
|    | <sup>1</sup> H- <sup>1</sup> H COSY spectrum of the new compound <b>12</b> | P51     |
|    | HMBC spectrum of the new compound <b>12</b>                                | P52     |
|    | NOESY spectrum of the new compound <b>12</b>                               | P52     |
| 13 | Spectra of the new compound <b>13</b>                                      | P53–P56 |
|    | HR-ESIMS spectrum of the new compound <b>13</b>                            | P53     |
|    | <sup>1</sup> H NMR spectrum of the new compound <b>13</b>                  | P53     |
|    | <sup>13</sup> C NMR spectrum of the new compound <b>13</b>                 | P54     |
|    | DEPT spectrum of the new compound <b>13</b>                                | P54     |
|    | HSQC spectrum of the new compound <b>13</b>                                | P55     |
|    | <sup>1</sup> H- <sup>1</sup> H COSY spectrum of the new compound <b>13</b> | P55     |
|    | HMBC spectrum of the new compound <b>13</b>                                | P56     |
|    | NOESY spectrum of the new compound <b>13</b>                               | P56     |
| 14 | Spectra of the new compound <b>14</b>                                      | P57–P60 |
|    | HR-ESIMS spectrum of the new compound <b>14</b>                            | P57     |
|    | <sup>1</sup> H NMR spectrum of the new compound <b>14</b>                  | P57     |
|    | <sup>13</sup> C NMR spectrum of the new compound <b>14</b>                 | P58     |
|    | DEPT spectrum of the new compound <b>14</b>                                | P58     |
|    | HSQC spectrum of the new compound <b>14</b>                                | P59     |
|    | <sup>1</sup> H- <sup>1</sup> H COSY spectrum of the new compound <b>14</b> | P59     |

|    |                                                                            |         |
|----|----------------------------------------------------------------------------|---------|
|    | HMBC spectrum of the new compound <b>14</b>                                | P60     |
|    | NOESY spectrum of the new compound <b>14</b>                               | P60     |
| 15 | Spectra of the new compound <b>15</b>                                      | P61–P64 |
|    | HR-ESIMS spectrum of the new compound <b>15</b>                            | P61     |
|    | <sup>1</sup> H NMR spectrum of the new compound <b>15</b>                  | P61     |
|    | <sup>13</sup> C NMR spectrum of the new compound <b>15</b>                 | P62     |
|    | DEPT spectrum of the new compound <b>15</b>                                | P62     |
|    | HSQC spectrum of the new compound <b>15</b>                                | P63     |
|    | <sup>1</sup> H- <sup>1</sup> H COSY spectrum of the new compound <b>15</b> | P63     |
|    | HMBC spectrum of the new compound <b>15</b>                                | P64     |
|    | NOESY spectrum of the new compound <b>15</b>                               | P64     |
| 16 | Spectra of the new compound <b>16</b>                                      | P65–P68 |
|    | HR-ESIMS spectrum of the new compound <b>16</b>                            | P65     |
|    | <sup>1</sup> H NMR spectrum of the new compound <b>16</b>                  | P65     |
|    | <sup>13</sup> C NMR spectrum of the new compound <b>16</b>                 | P66     |
|    | DEPT spectrum of the new compound <b>16</b>                                | P66     |
|    | HSQC spectrum of the new compound <b>16</b>                                | P67     |
|    | <sup>1</sup> H- <sup>1</sup> H COSY spectrum of the new compound <b>16</b> | P67     |
|    | HMBC spectrum of the new compound <b>16</b>                                | P68     |
|    | NOESY spectrum of the new compound <b>16</b>                               | P68     |
| 17 | Spectra of the new compound <b>17</b>                                      | P69–P72 |
|    | HR-ESIMS spectrum of the new compound <b>17</b>                            | P69     |
|    | <sup>1</sup> H NMR spectrum of the new compound <b>17</b>                  | P69     |
|    | <sup>13</sup> C NMR spectrum of the new compound <b>17</b>                 | P70     |
|    | DEPT spectrum of the new compound <b>17</b>                                | P70     |
|    | HSQC spectrum of the new compound <b>17</b>                                | P71     |
|    | <sup>1</sup> H- <sup>1</sup> H COSY spectrum of the new compound <b>17</b> | P71     |
|    | HMBC spectrum of the new compound <b>17</b>                                | P72     |
|    | NOESY spectrum of the new compound <b>17</b>                               | P72     |
| 18 | Spectra of the new compound <b>18</b>                                      | P73–P76 |
|    | HR-ESIMS spectrum of the new compound <b>18</b>                            | P73     |
|    | <sup>1</sup> H NMR spectrum of the new compound <b>18</b>                  | P73     |
|    | <sup>13</sup> C NMR spectrum of the new compound <b>18</b>                 | P74     |
|    | DEPT spectrum of the new compound <b>18</b>                                | P74     |
|    | HSQC spectrum of the new compound <b>18</b>                                | P75     |
|    | <sup>1</sup> H- <sup>1</sup> H COSY spectrum of the new compound <b>18</b> | P75     |
|    | HMBC spectrum of the new compound <b>18</b>                                | P76     |
|    | NOESY spectrum of the new compound <b>18</b>                               | P76     |

Figure S1. HR-ESIMS spectrum of the new compound 1.

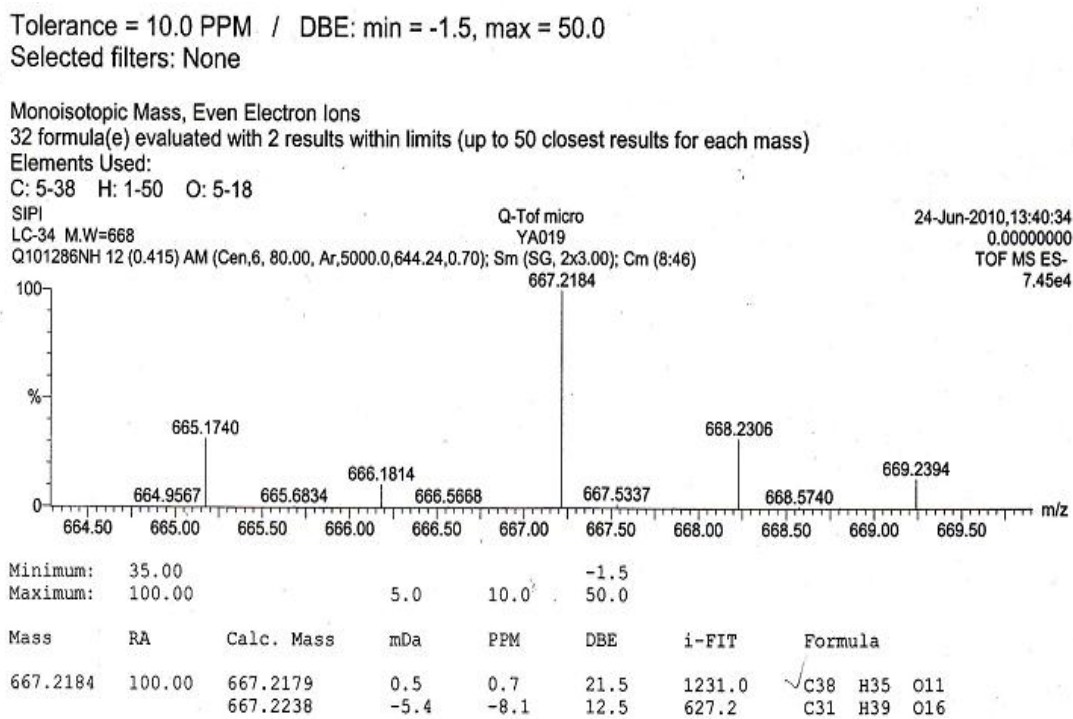

Figure S2. <sup>1</sup>H MNR (600 MHz, CDCl<sub>3</sub>) spectrum of the new compound 1.

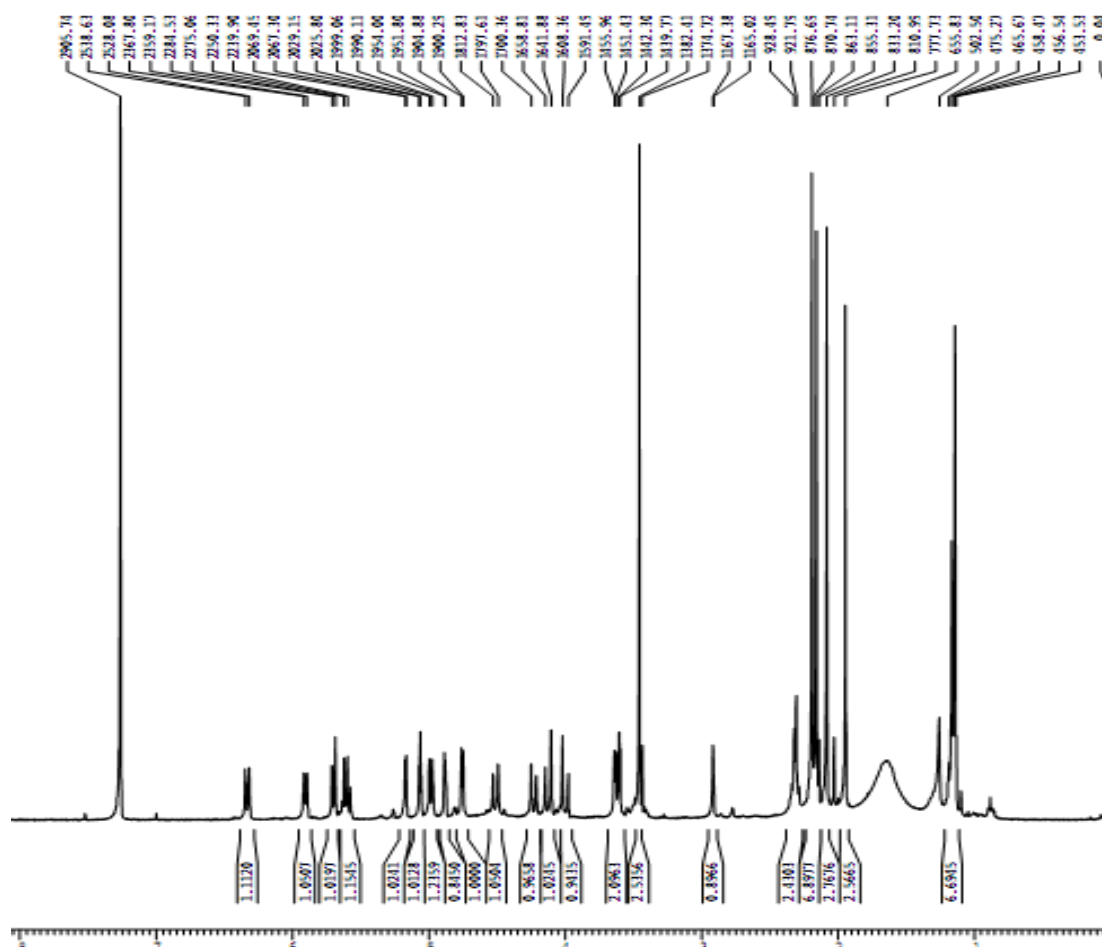

Figure S3. <sup>13</sup>C MNR (150 MHz, CDCl<sub>3</sub>) spectrum of the new compound 1.

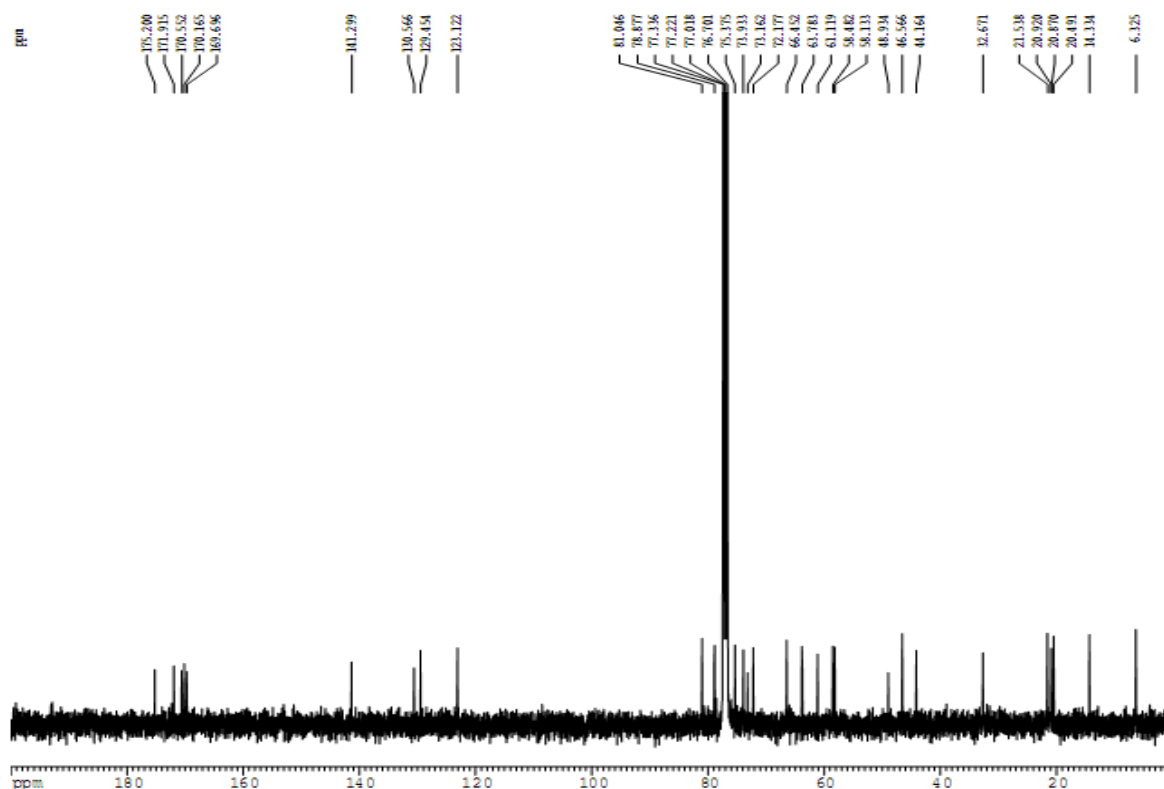

Figure S4. DEPT spectrum of the new compound 1.

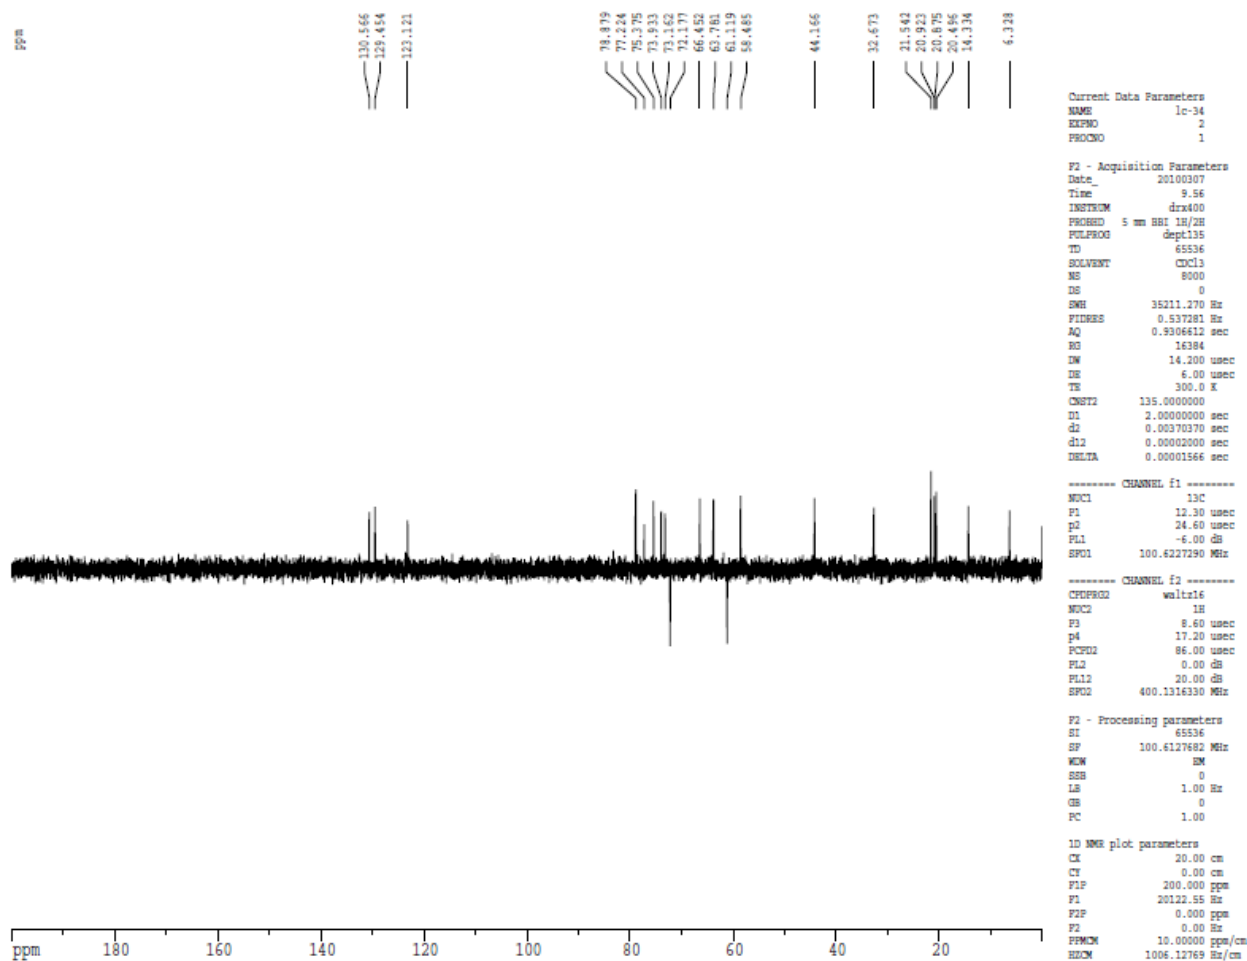

Figure S5. HSQC spectrum of the new compound 1.

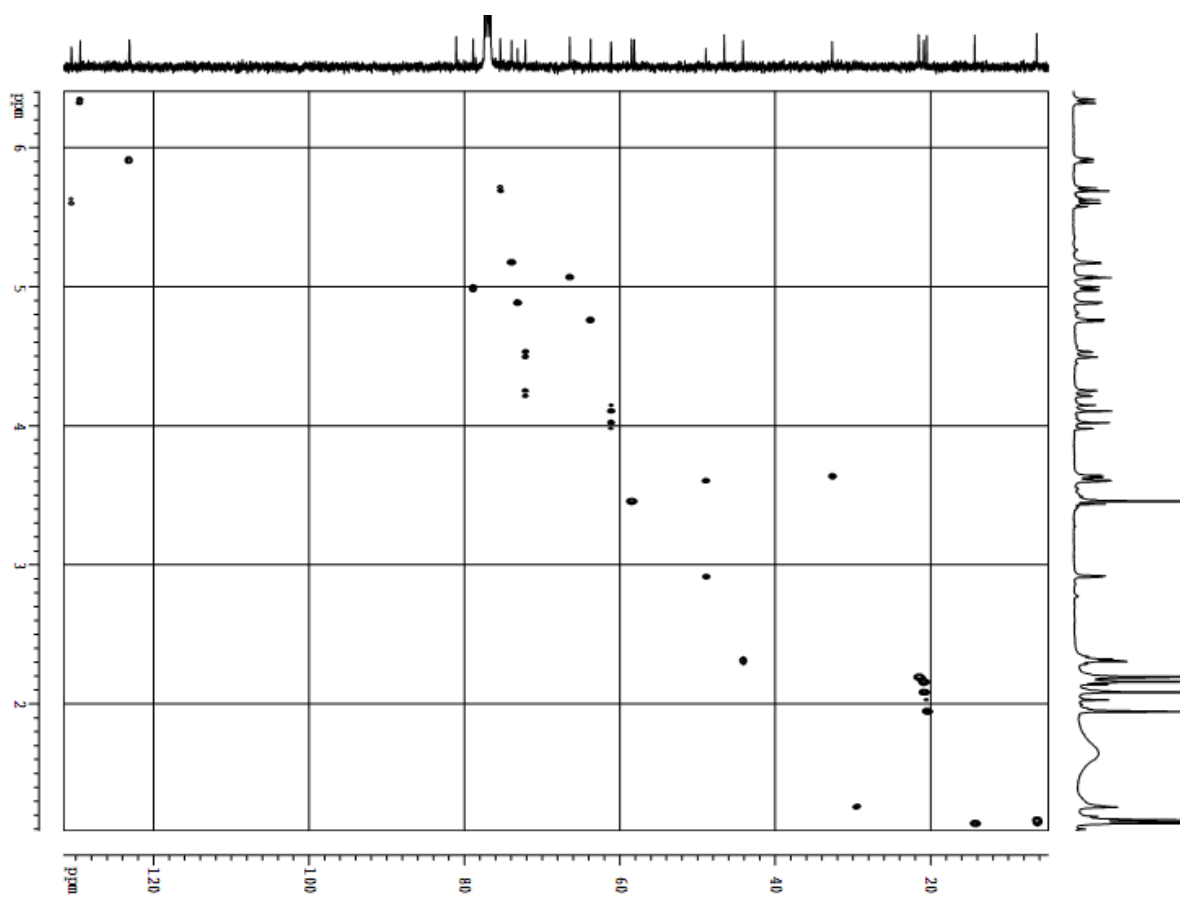Figure S6.  $^1\text{H}$ - $^1\text{H}$  COSY spectrum of the new compound 1.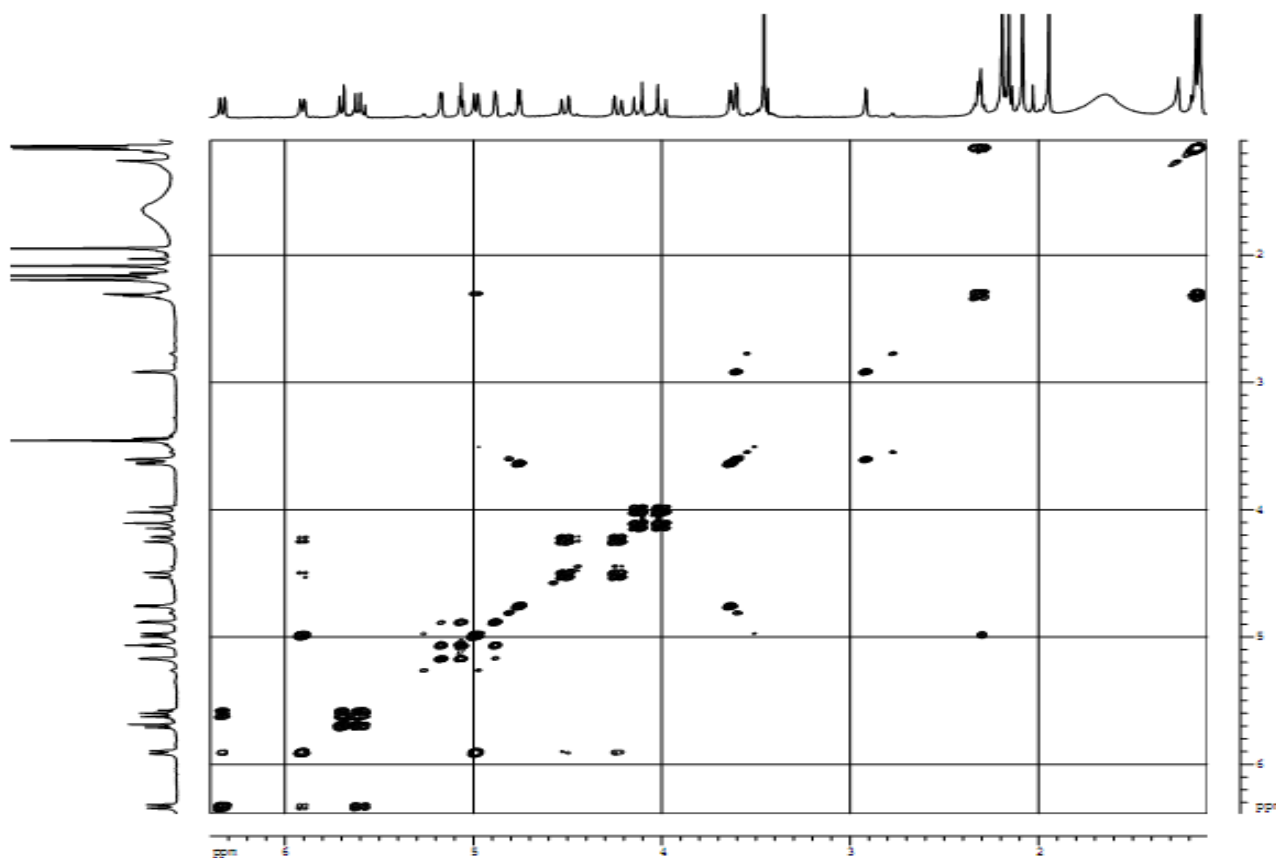

Figure S7. HMBC spectrum of the new compound 1.

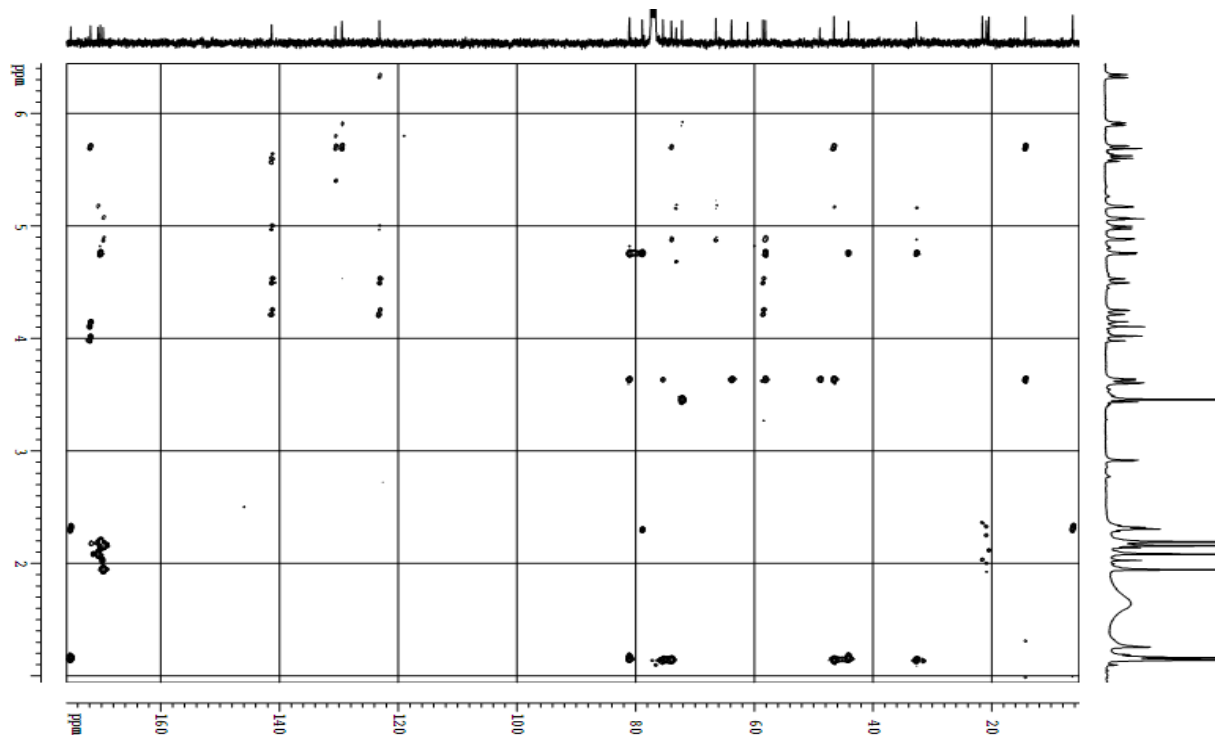

Figure S8. NOESY spectrum of the new compound 1.

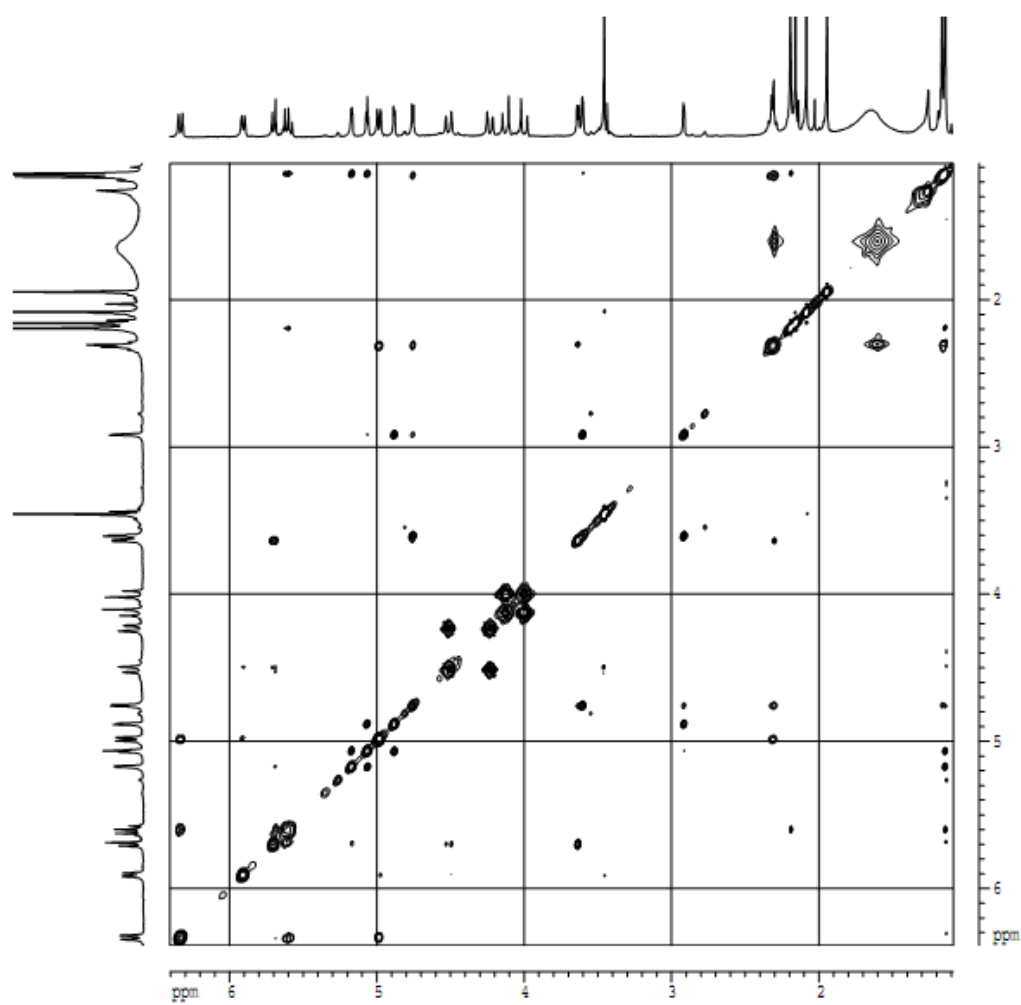



Figure S9. HR-ESIMS spectrum of the new compound 2.

Tolerance = 20.0 PPM / DBE: min = -1.5, max = 50.0  
 Selected filters: None

Monoisotopic Mass, Even Electron Ions  
 19 formula(e) evaluated with 1 results within limits (up to 50 closest results for each mass)

Elements Used:

C: 5-35 H: 1-55 O: 2-17 Na: 1-1

SIPI

LA-6 C34H46O16=710

Q101319H 20 (0.690) AM (Cen,6, 80.00, Ar,5000.0,748.48,0.70); Sm (SG, 2x3.00); Cm (20:35)

Q-ToF micro

YA019

29-Jun-2010,13:26:14

0.00000000

TOF MS ES+

1.14e5

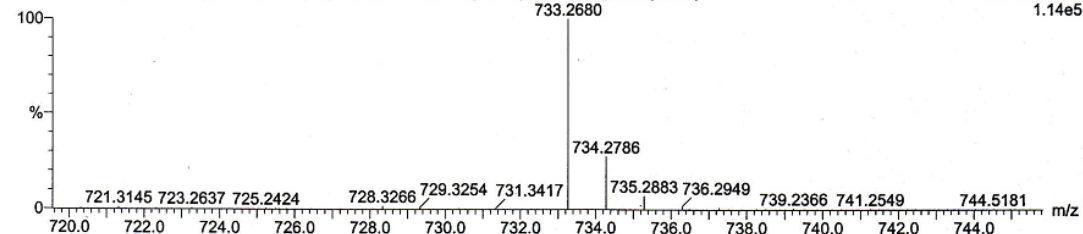

Minimum: 30.00  
 Maximum: 100.00

| Mass     | RA     | Calc. Mass | mDa  | PPM  | DBE  | i-FIT  | Formula        |
|----------|--------|------------|------|------|------|--------|----------------|
| 733.2680 | 100.00 | 733.2684   | -0.4 | -0.5 | 11.5 | 2246.6 | C34 H46 O16 Na |

Figure S10. <sup>1</sup>H MNR (400 MHz, CDCl<sub>3</sub>) spectrum of the new compound 2.

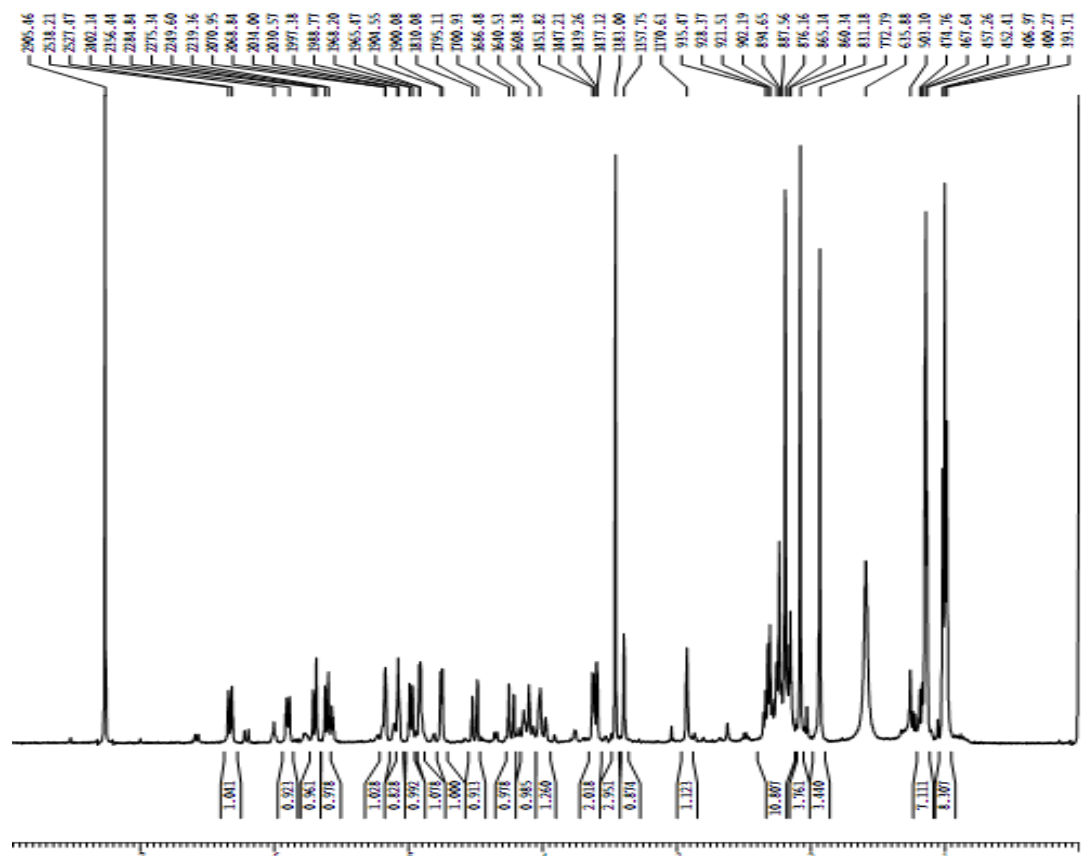

Figure S11. <sup>13</sup>C MNR (125 MHz, CDCl<sub>3</sub>) spectrum of the new compound 2.

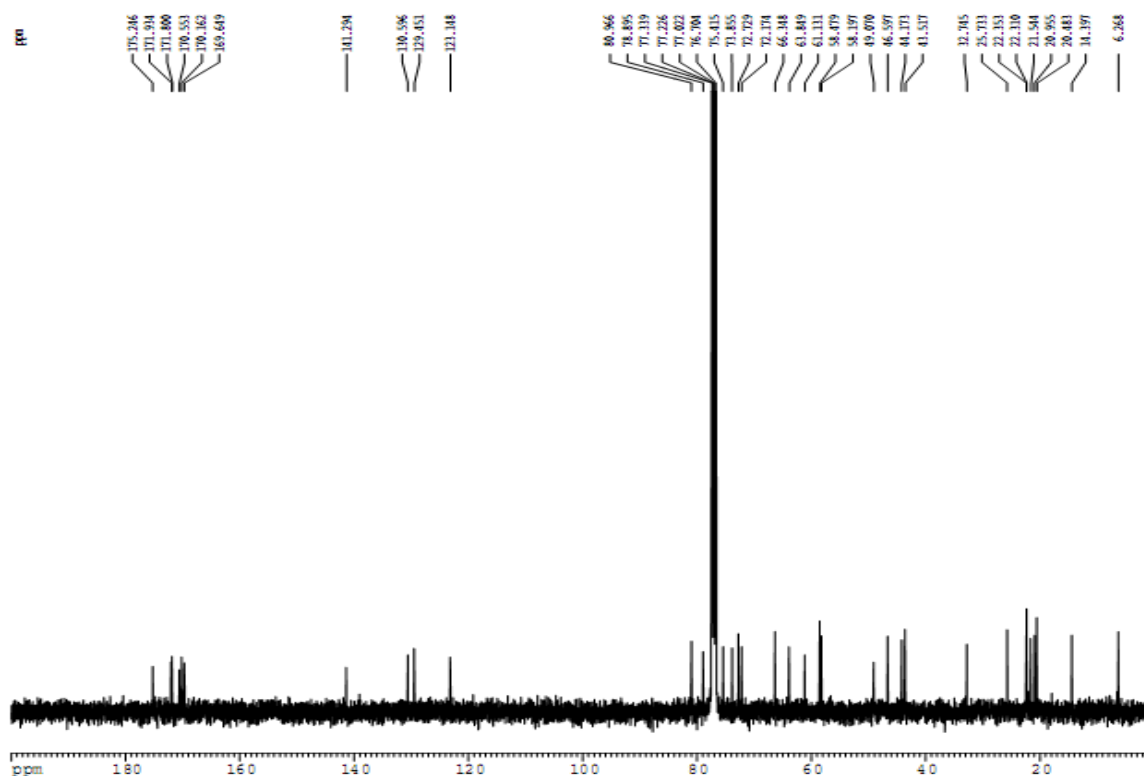

Figure S12. DEPT spectrum of the new compound 2.

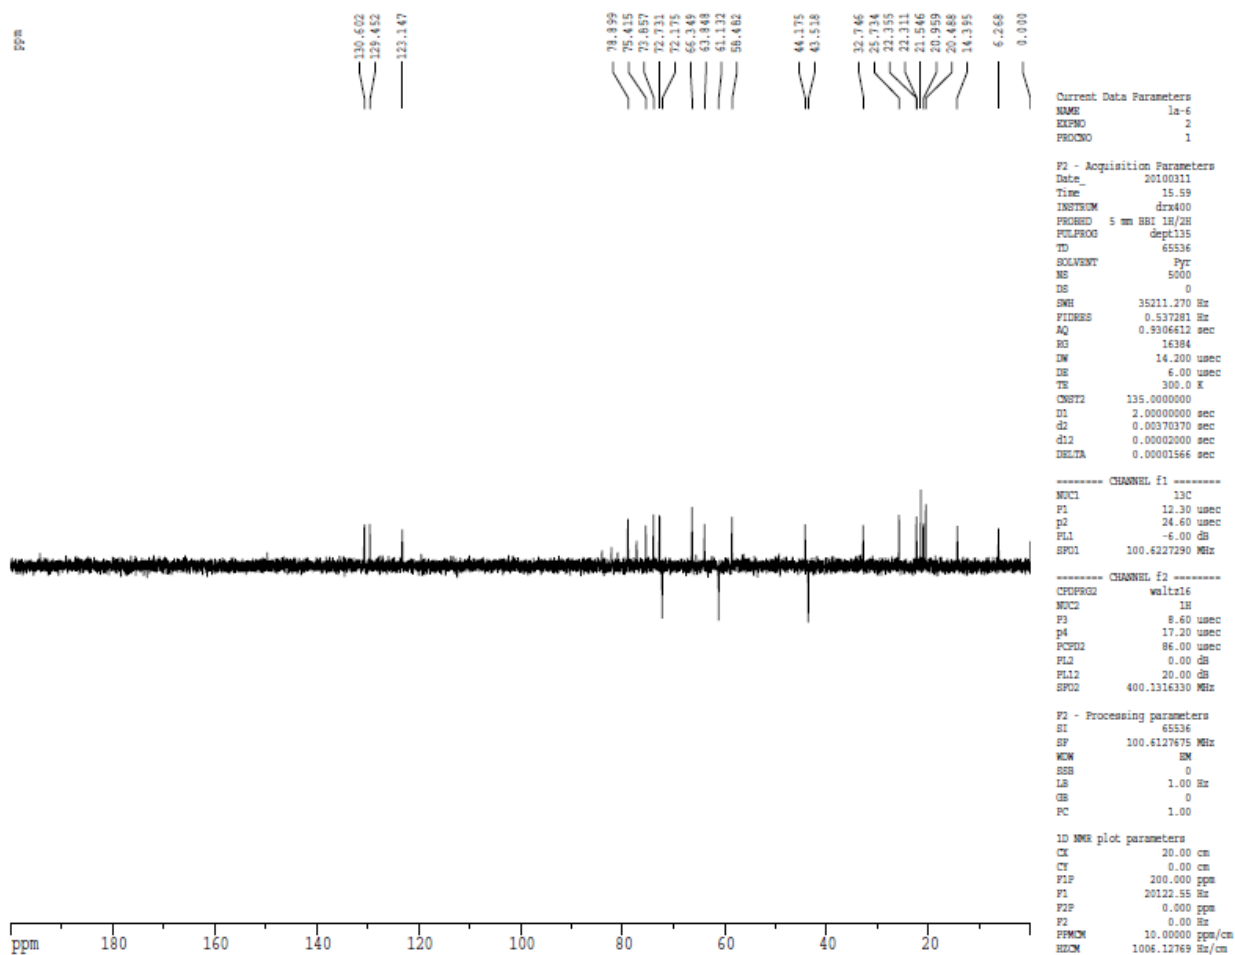



Figure S15. HMBC spectrum of the new compound 2.

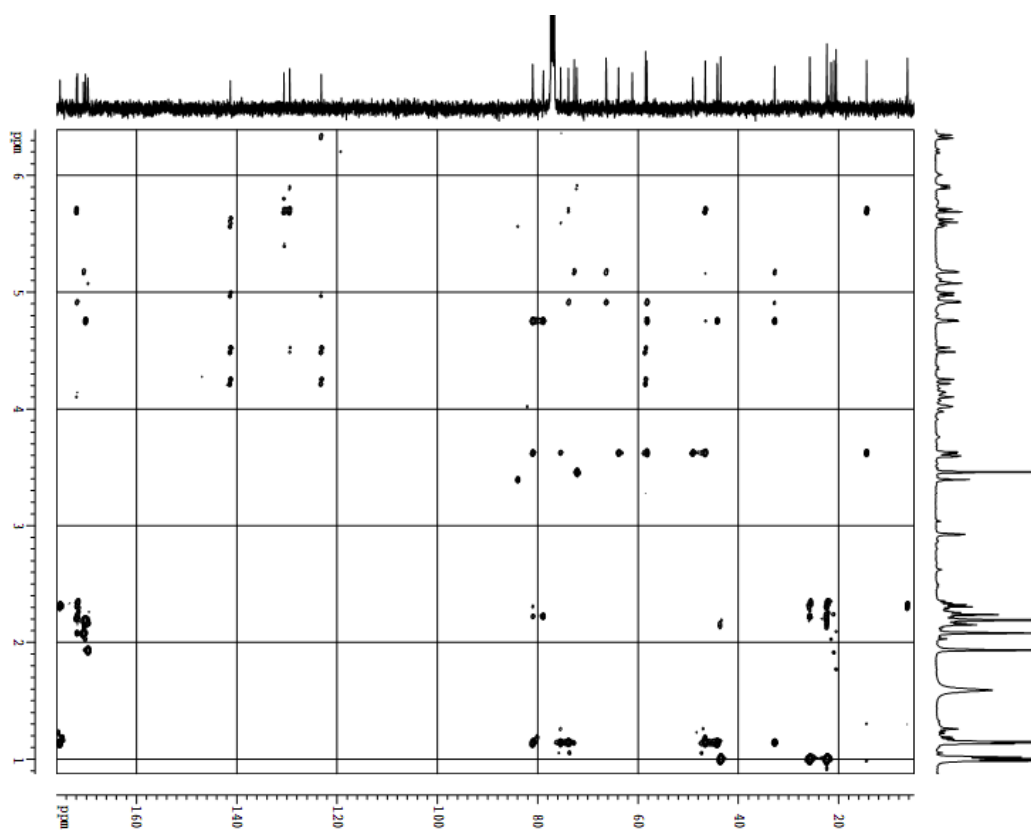

Figure S16. NOESY spectrum of the new compound 2.

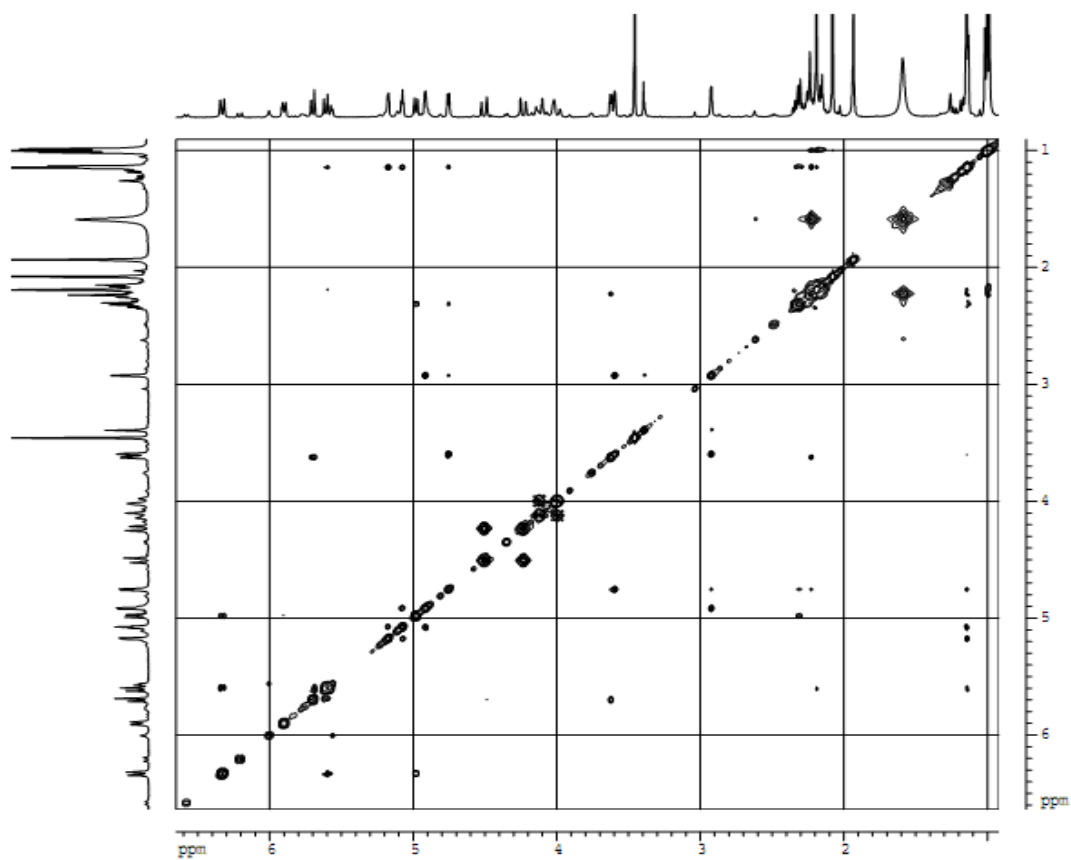

Figure S17. HR-ESIMS spectrum of new compound 3.

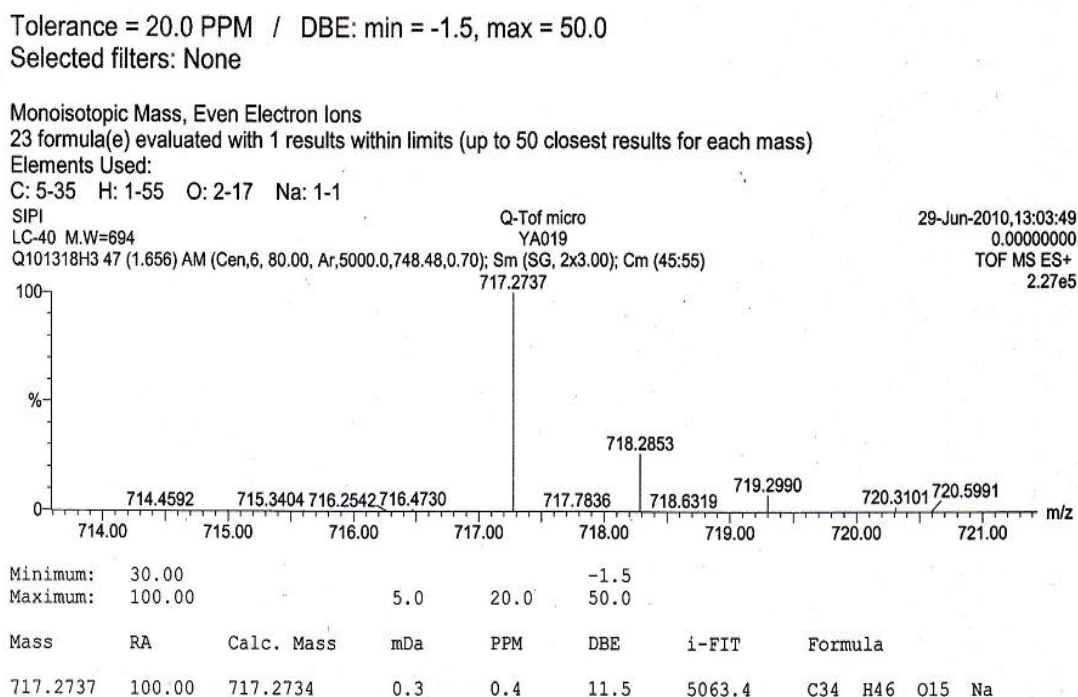

Figure S18. <sup>1</sup>H MNR (400 MHz, CDCl<sub>3</sub>) spectrum of the new compound 3.

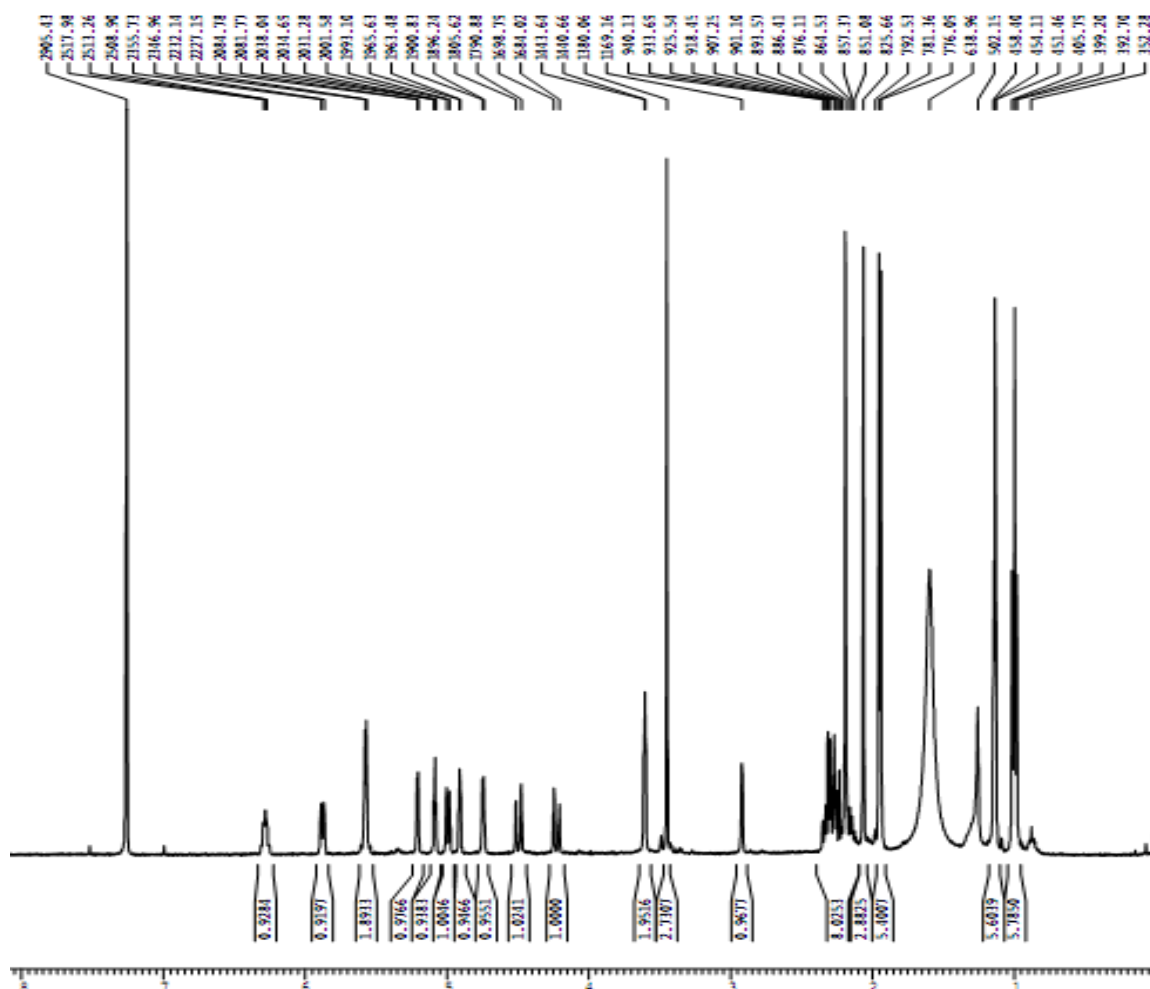

Figure S19. <sup>13</sup>C MNR (100 MHz, CDCl<sub>3</sub>) spectrum of the new compound 3.

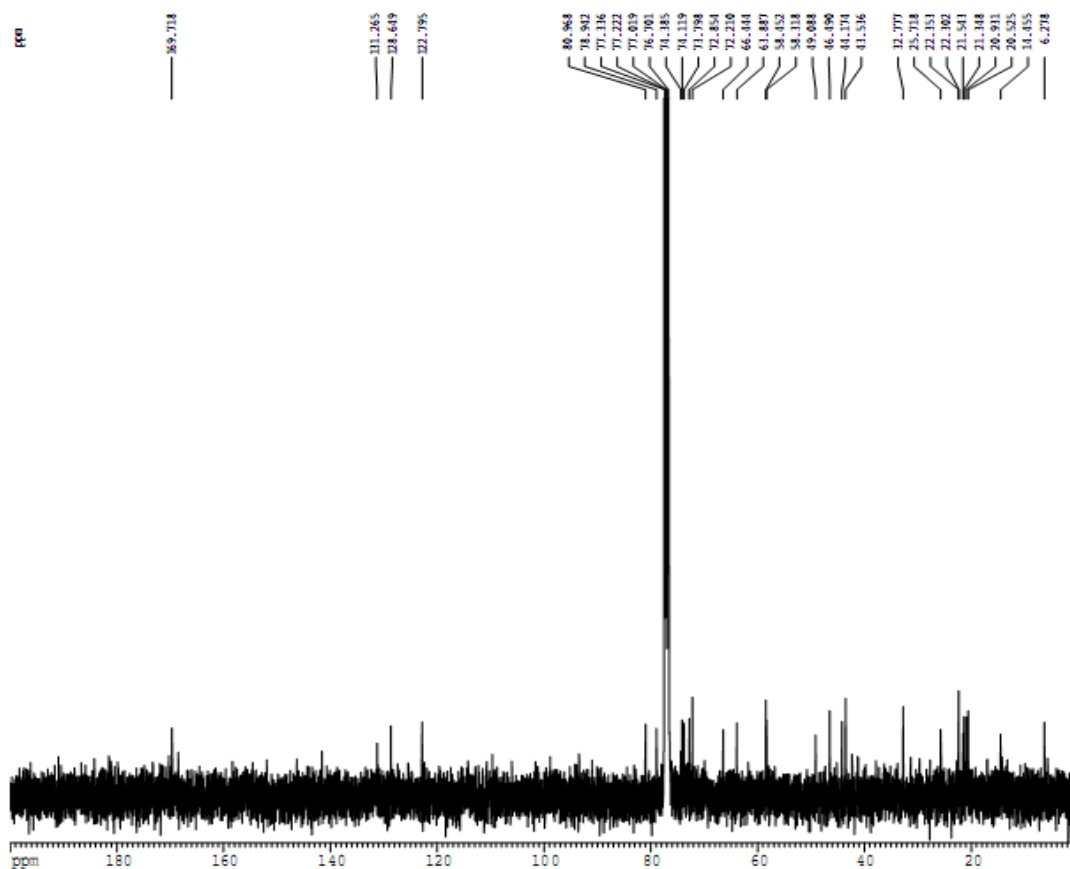

Figure S20. DEPT spectrum of the new compound 3.

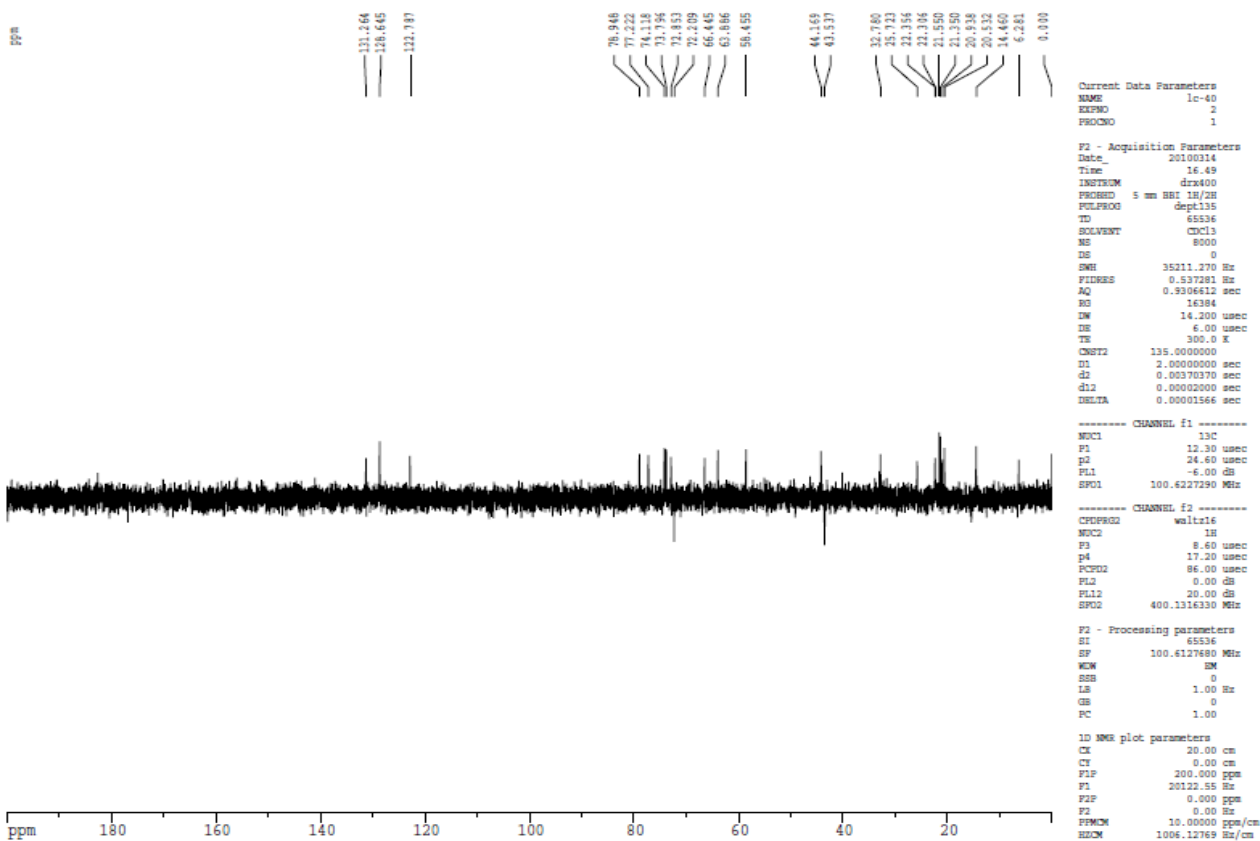

Figure S21. HSQC spectrum of the new compound 3.

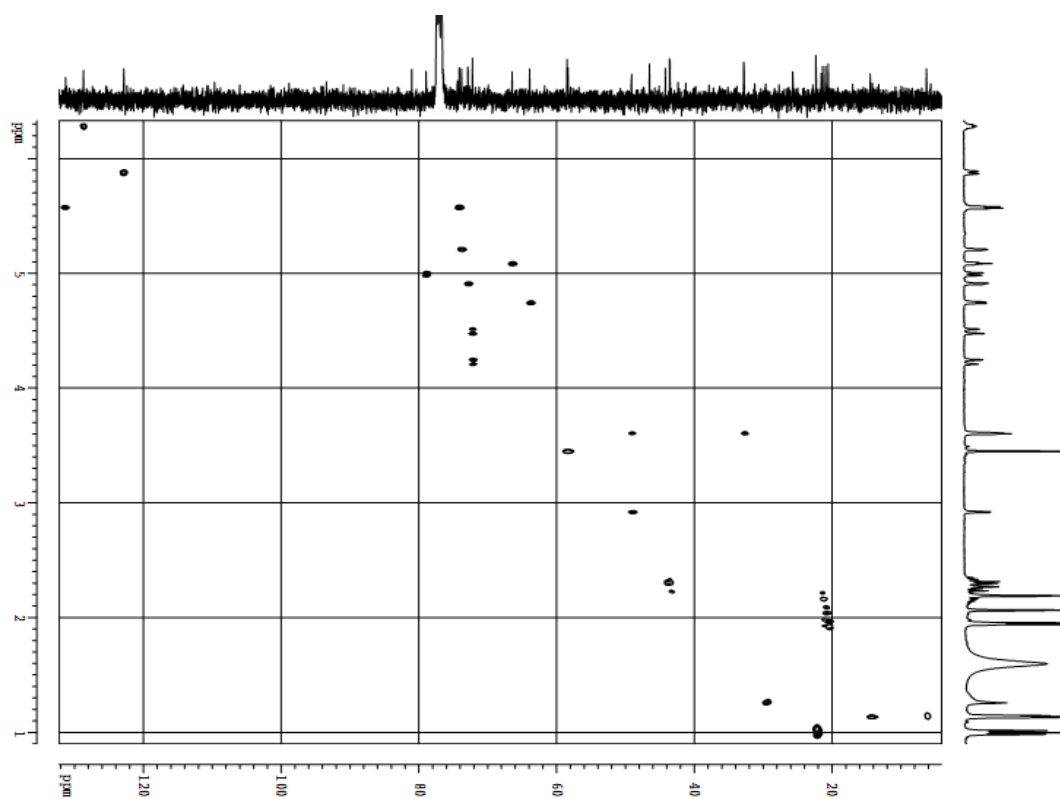

Figure S22.  $^1\text{H}$ - $^1\text{H}$  COSY spectrum of the new compound 3.

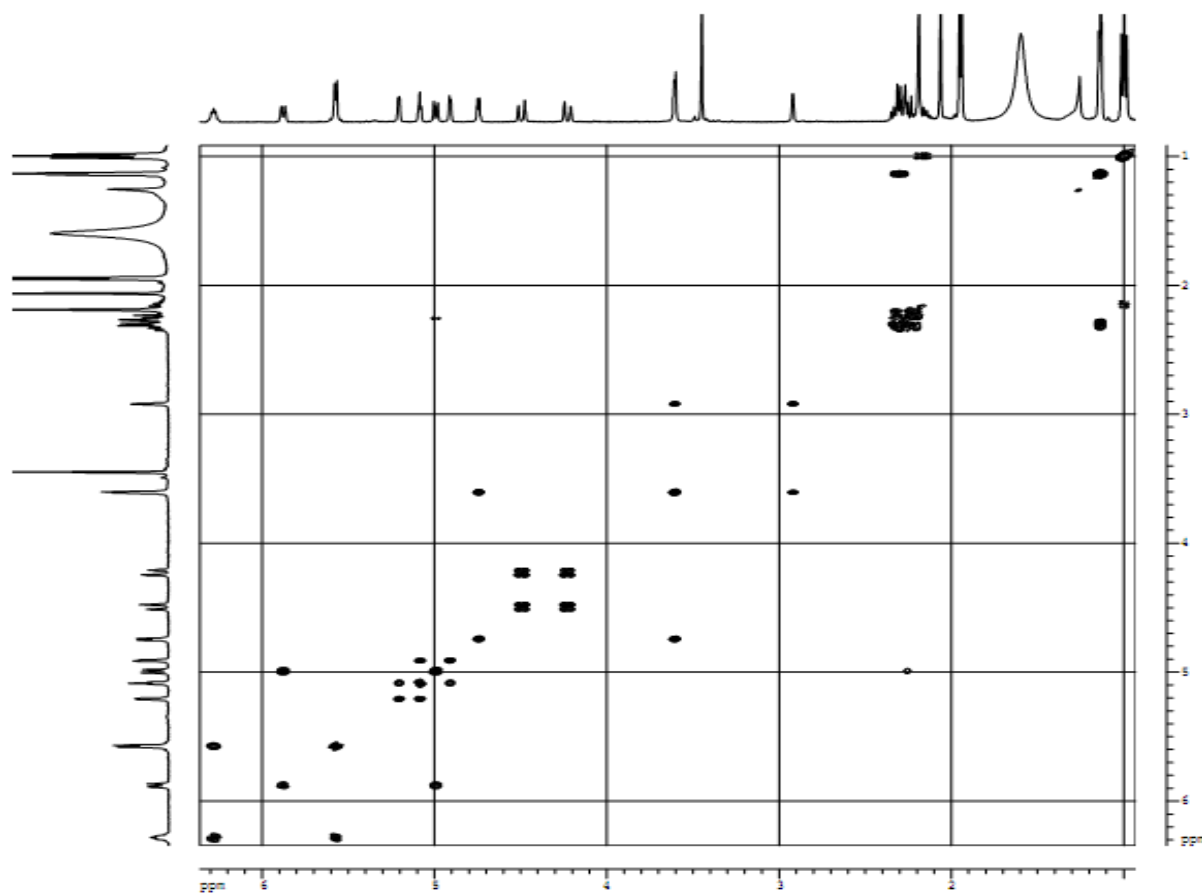

Figure S23. HMBC spectrum of the new compound 3.

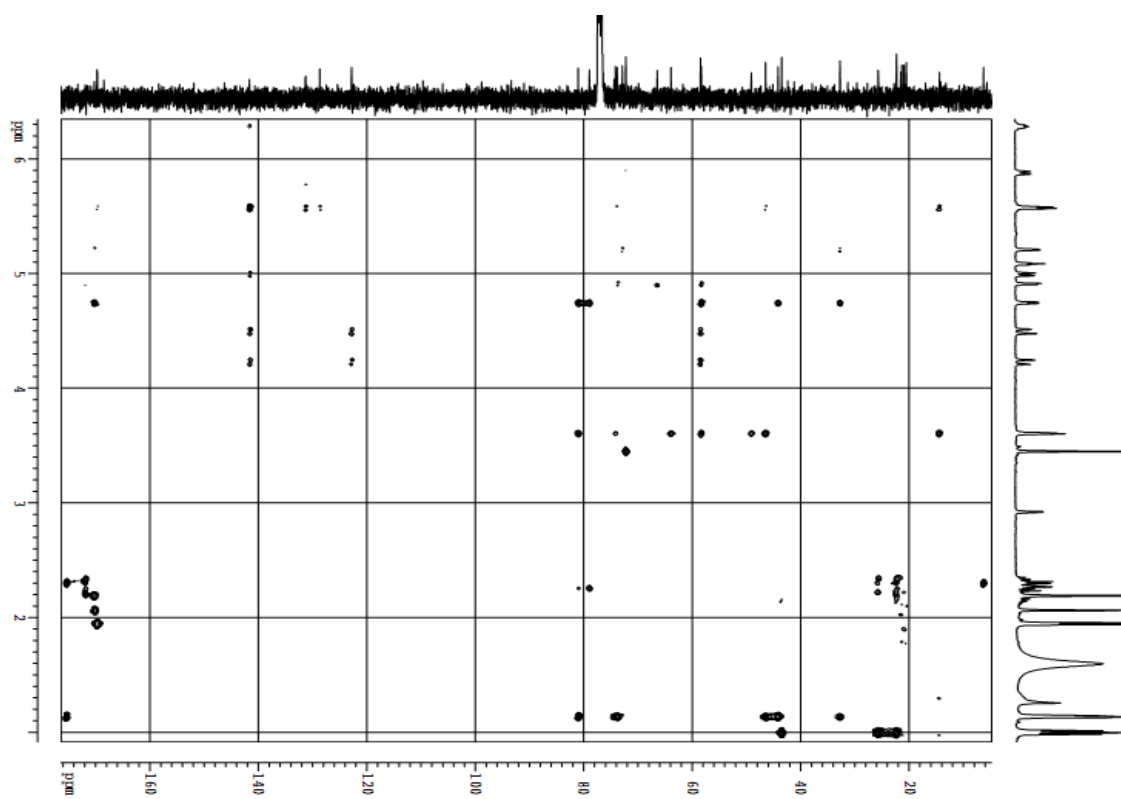

Figure S24. NOESY spectrum of the new compound 3.

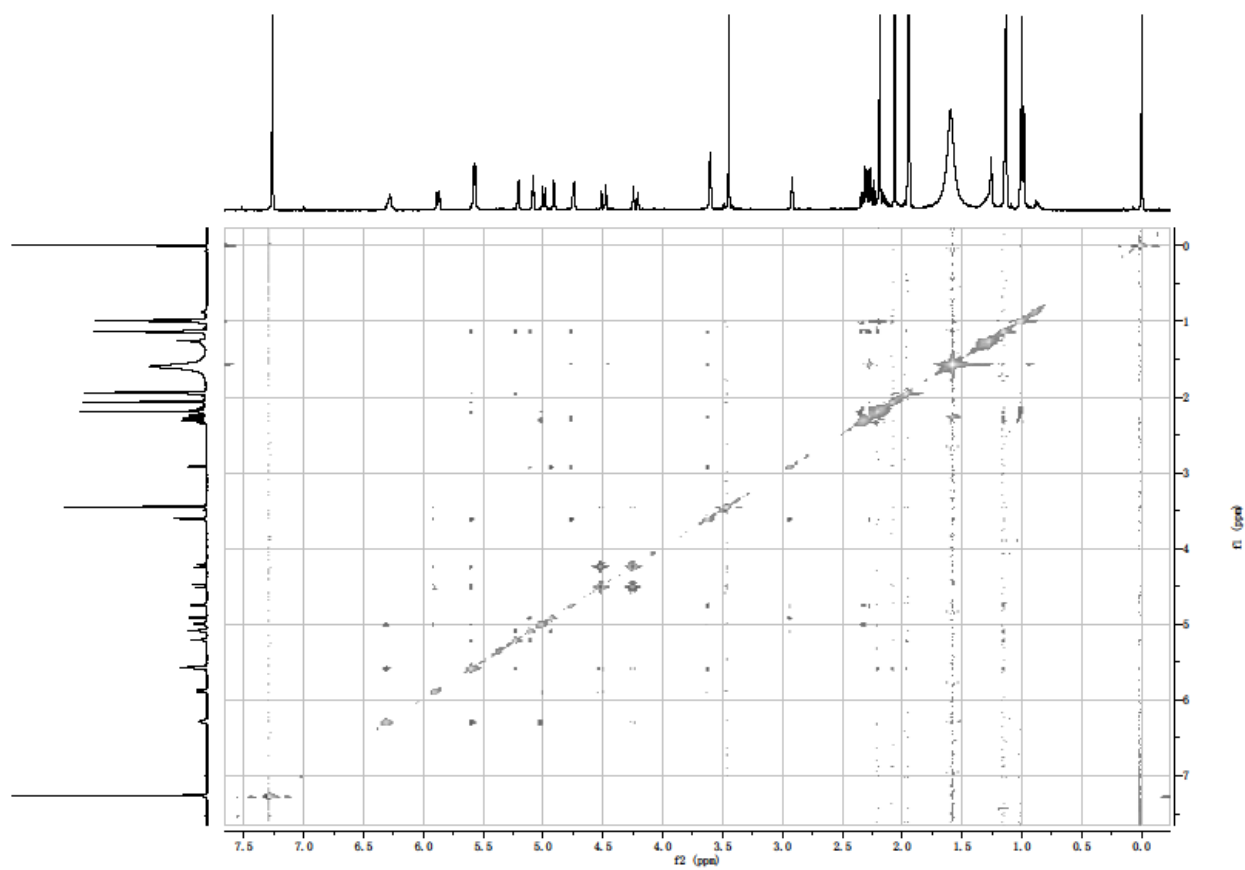



Figure S25. HRESIMS spectrum of compound 4.

Tolerance = 10.0 PPM / DBE: min = -1.5, max = 50.0  
 Selected filters: None

Monoisotopic Mass, Even Electron Ions  
 19 formula(e) evaluated with 1 results within limits (up to 50 closest results for each mass)  
 Elements Used:  
 C: 10-40 H: 10-60 O: 5-16 Na: 1-1

SIPI  
 MC-11 M.W=736  
 WQ12-438H2 7 (0.242) AM (Cen,4, 80.00, Ar,5000.0,775.30,0.70); Sm (SG, 2x1.00); Cm (2:7)  
 Q-ToF micro YA019  
 04-Nov-2012,10:05:35  
 TOF MS ES+ 3.21e3

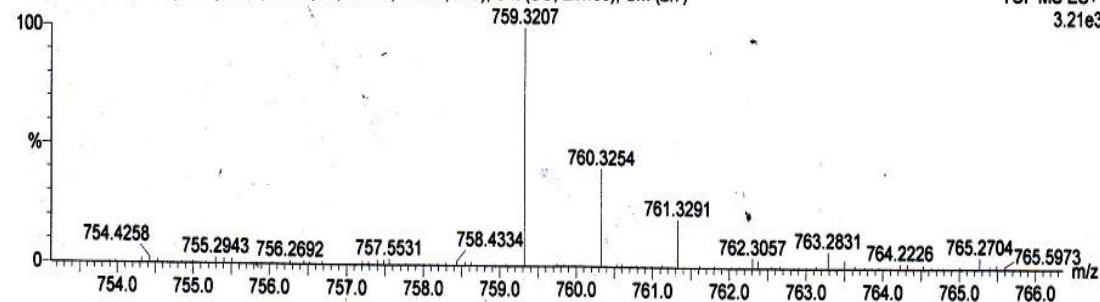

Minimum: 60.00  
 Maximum: 100.00

| Mass     | RA     | Calc. Mass | mDa | PPM | DBE  | i-FIT | Formula        |
|----------|--------|------------|-----|-----|------|-------|----------------|
| 759.3207 | 100.00 | 759.3204   | 0.3 | 0.4 | 11.5 | 51.5  | C37 H52 O15 Na |

Figure S26. <sup>1</sup>H NMR spectrum of compound 4 in CDCl<sub>3</sub>.

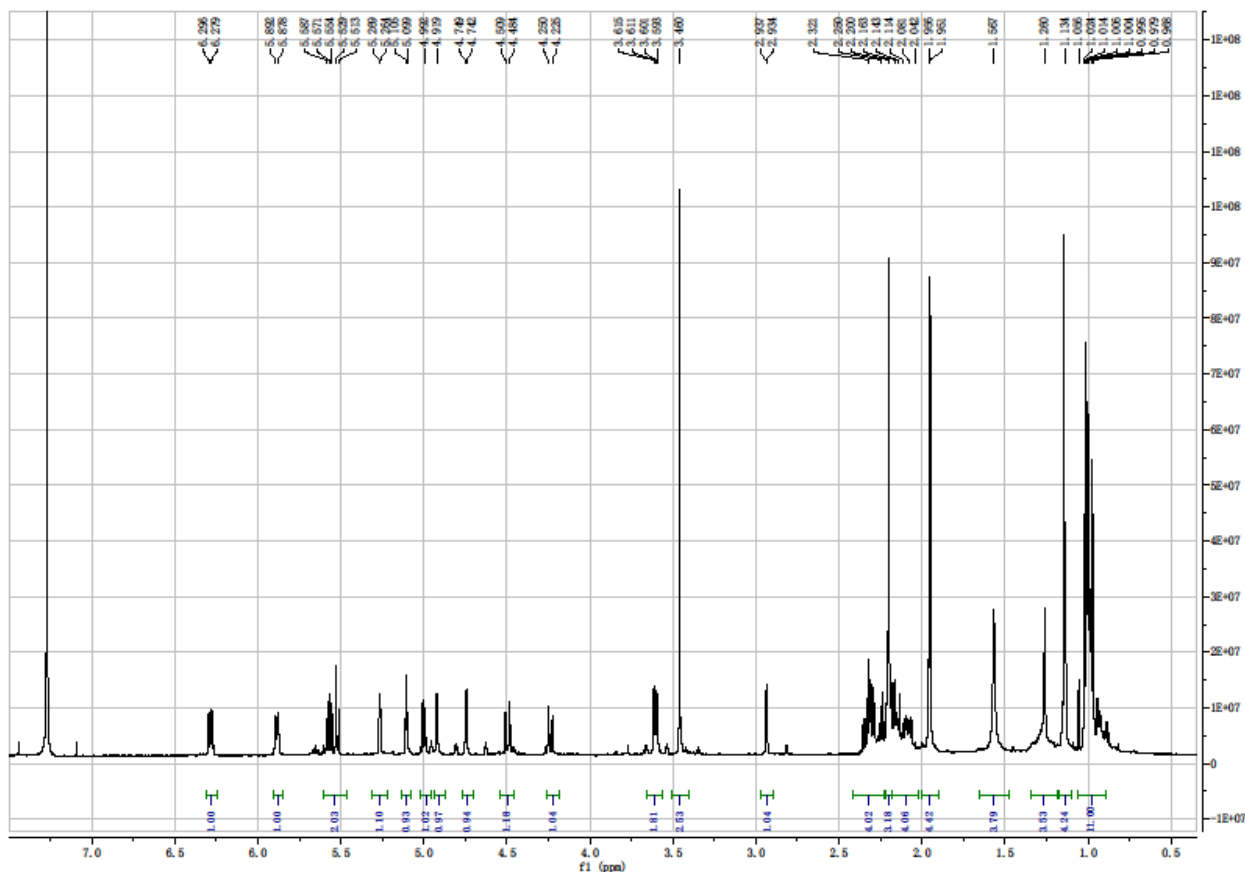

Figure S27. <sup>13</sup>C NMR spectrum of compound 4 in CDCl<sub>3</sub>.

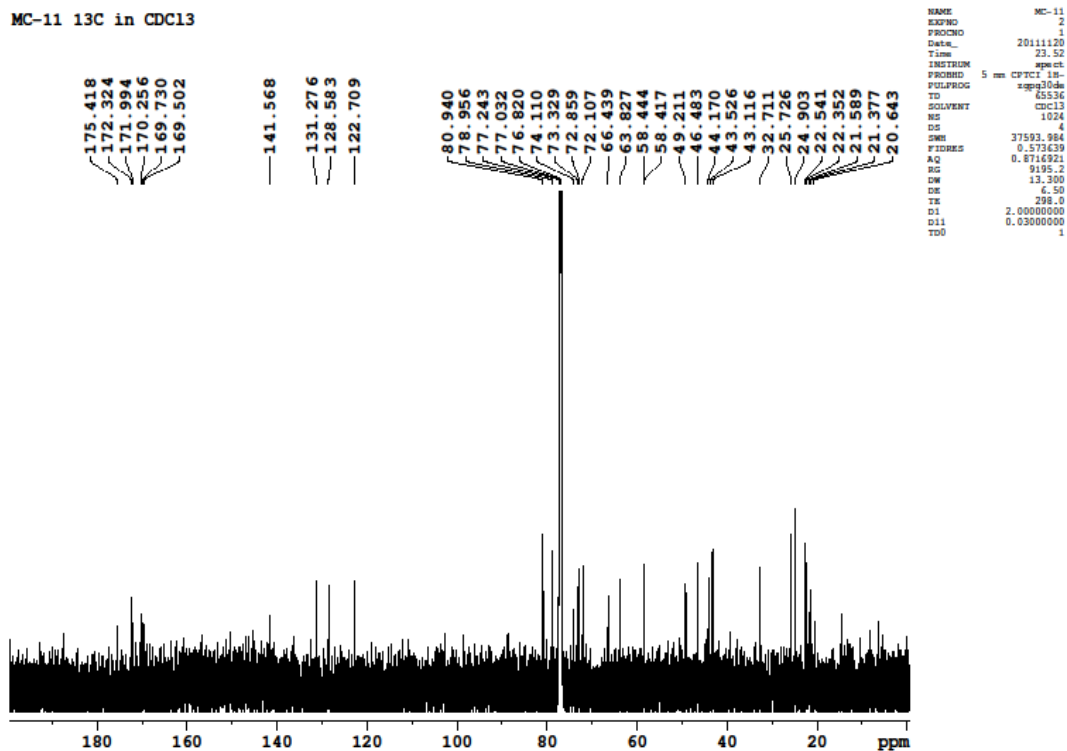

Figure S28. DEPT spectrum of compound 4 in CDCl<sub>3</sub>.

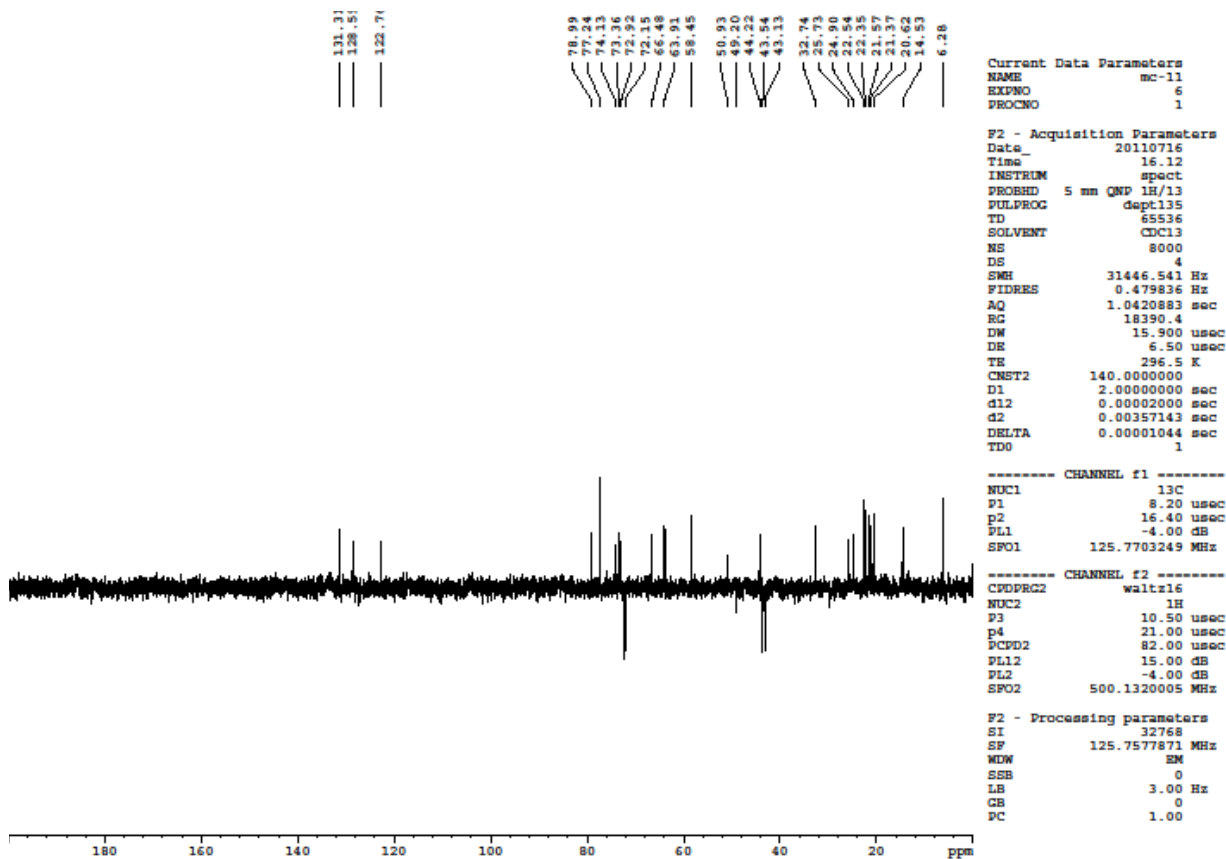

Figure S29. HSQC spectrum of compound 4 in CDCl<sub>3</sub>.

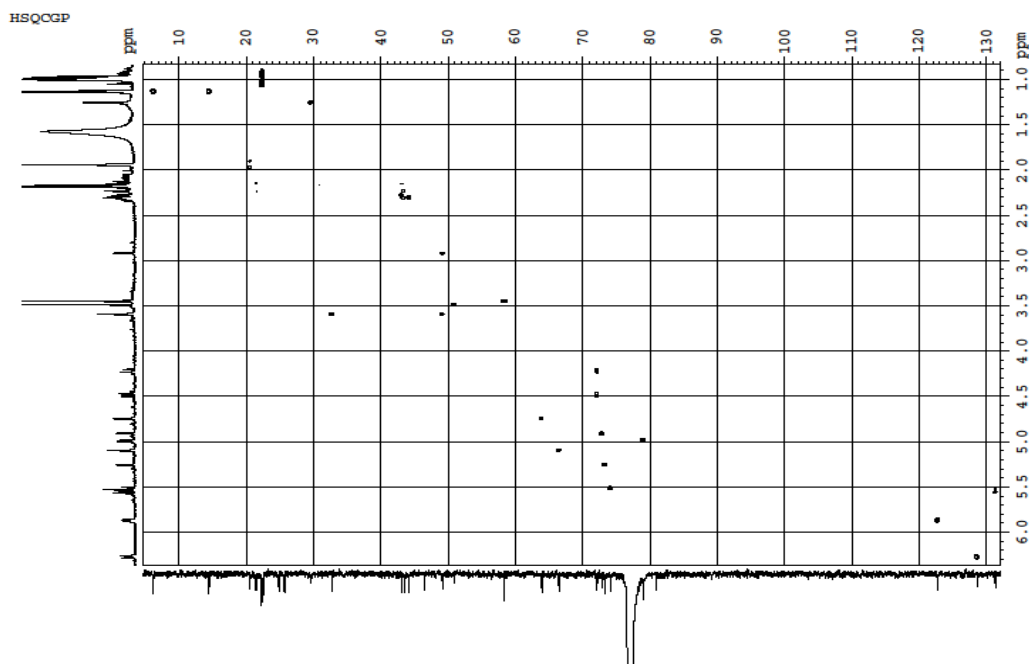

Figure S30. <sup>1</sup>H-<sup>1</sup>H COSY spectrum of compound 4 in CDCl<sub>3</sub>.

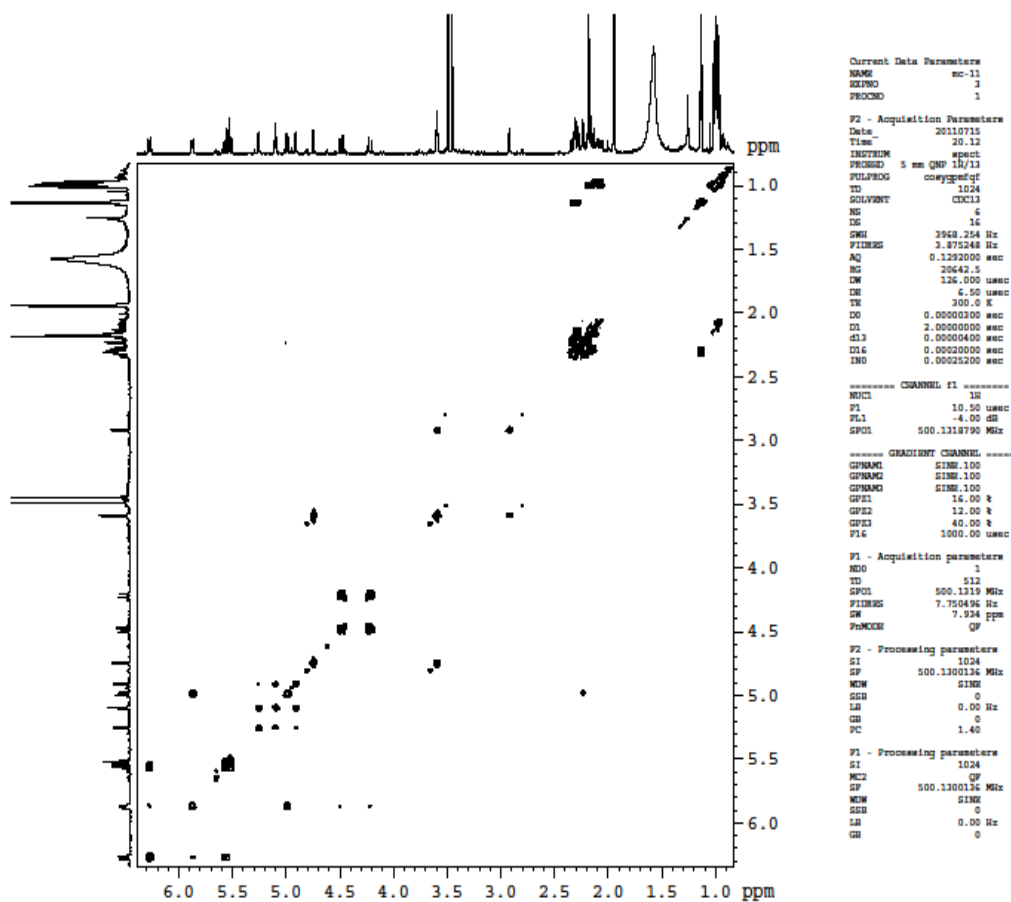

Figure S31. HMBC spectrum of compound 4 in CDCl<sub>3</sub>.

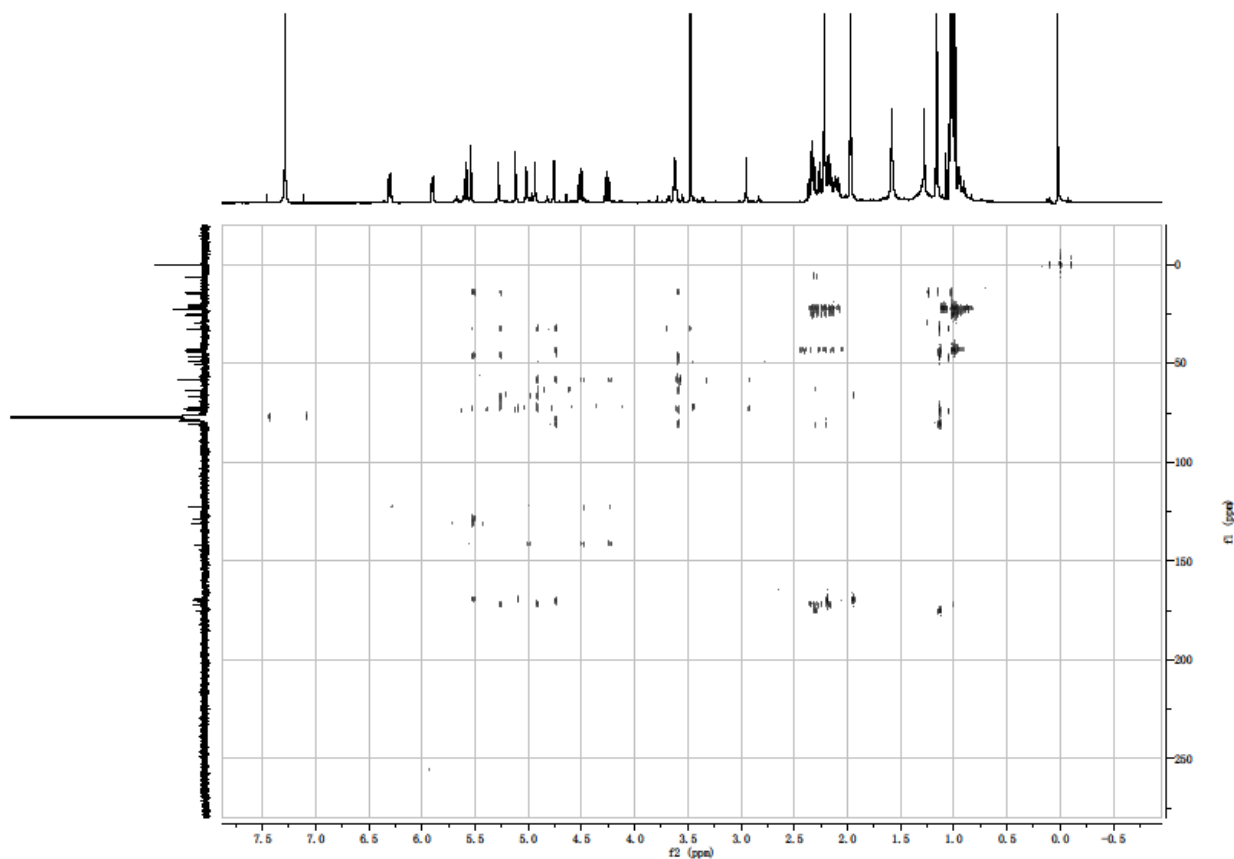

Figure S32. NOESY spectrum of compound 4 in CDCl<sub>3</sub>.

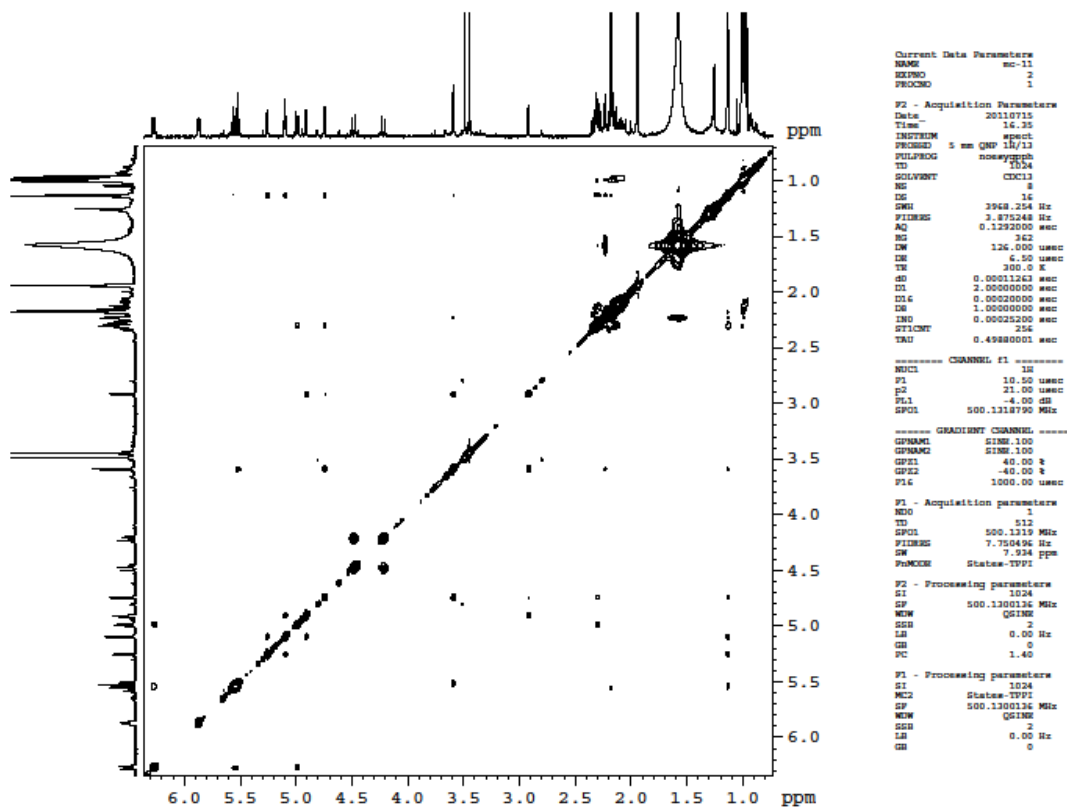

Figure S33. HR-ESIMS spectrum of the new compound 5.

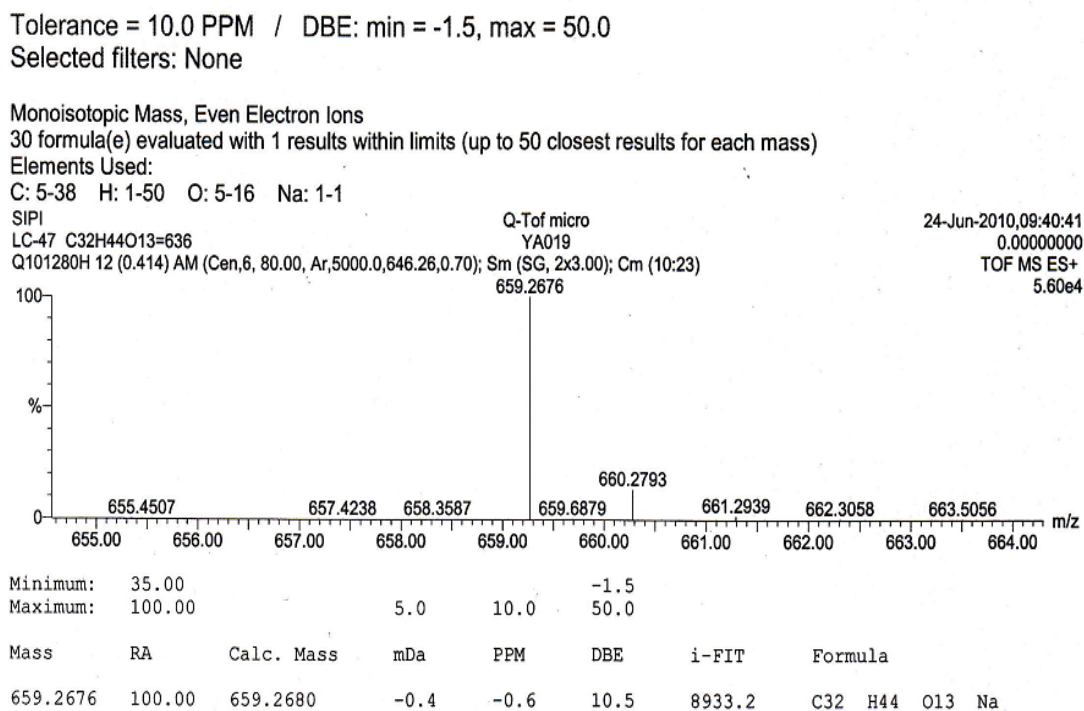

Figure S34. <sup>1</sup>H MNR (400 MHz, CDCl<sub>3</sub>) spectrum of the new compound 5.

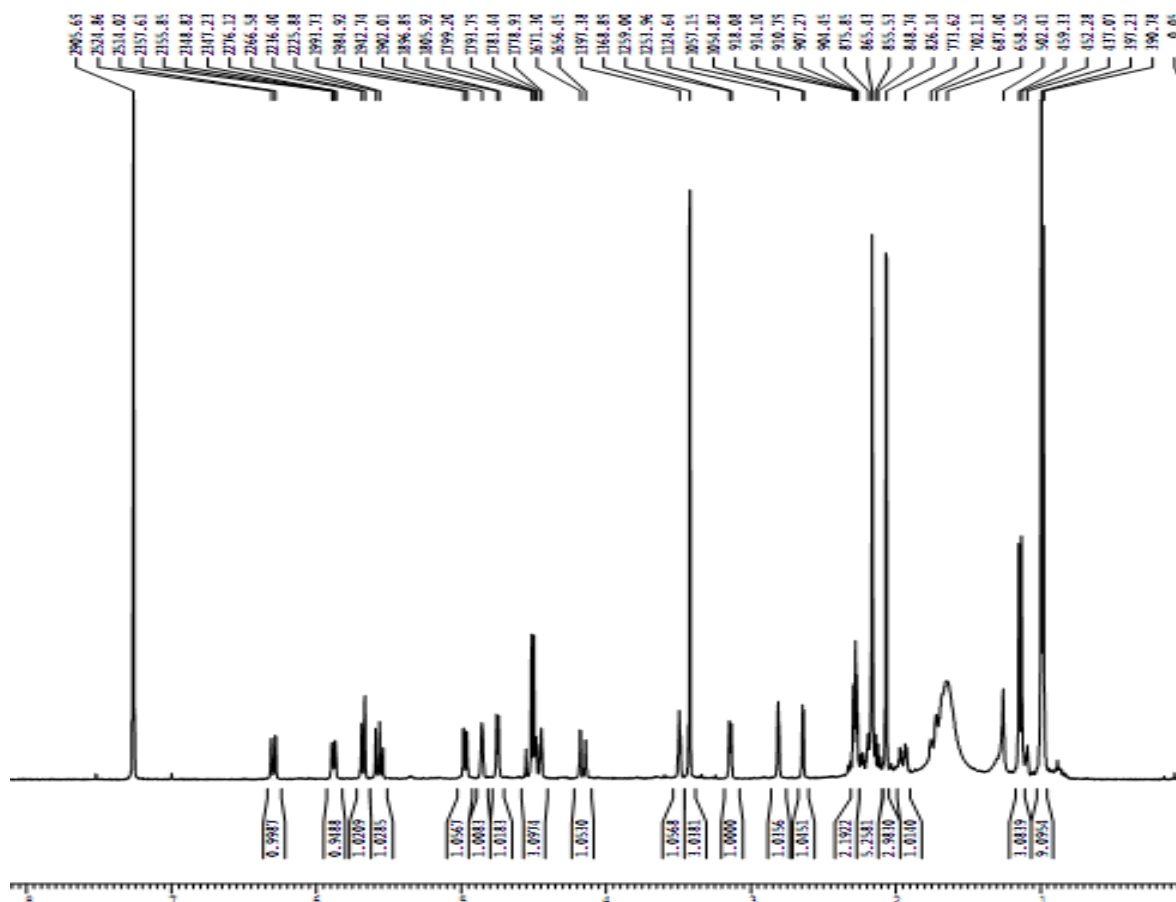

Figure S35. <sup>13</sup>C MNR (100 MHz, CDCl<sub>3</sub>) spectrum of the new compound 5.

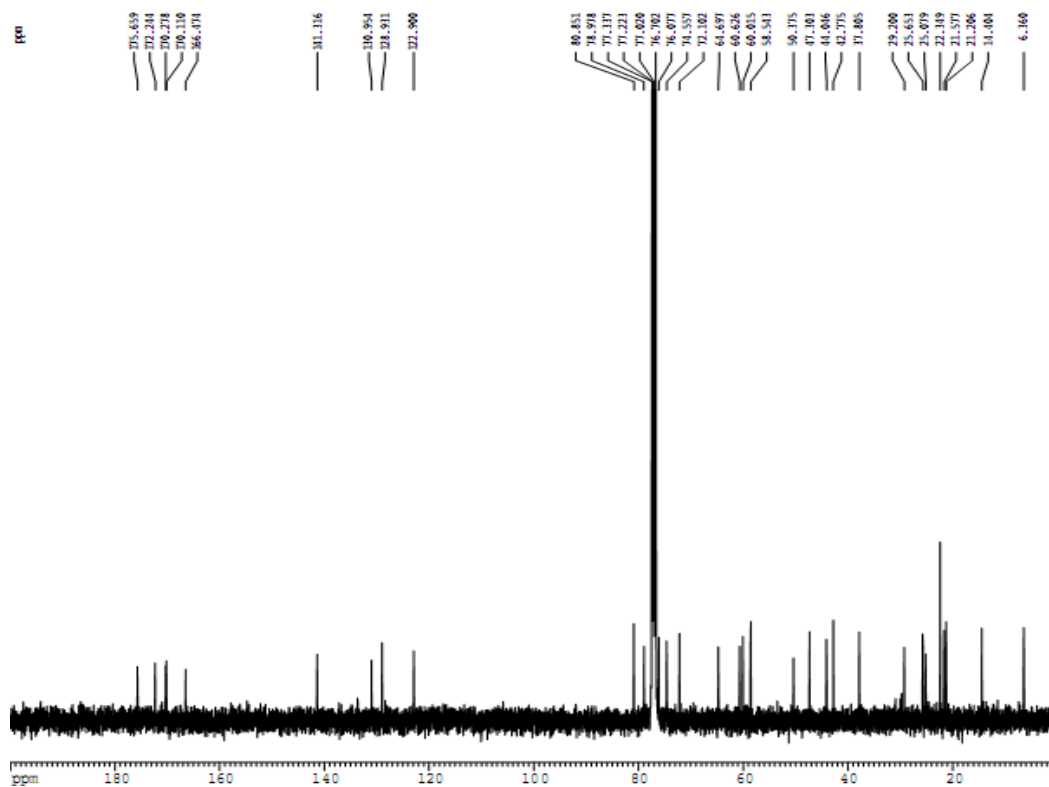

Figure S36. DEPT spectrum of the new compound 5.

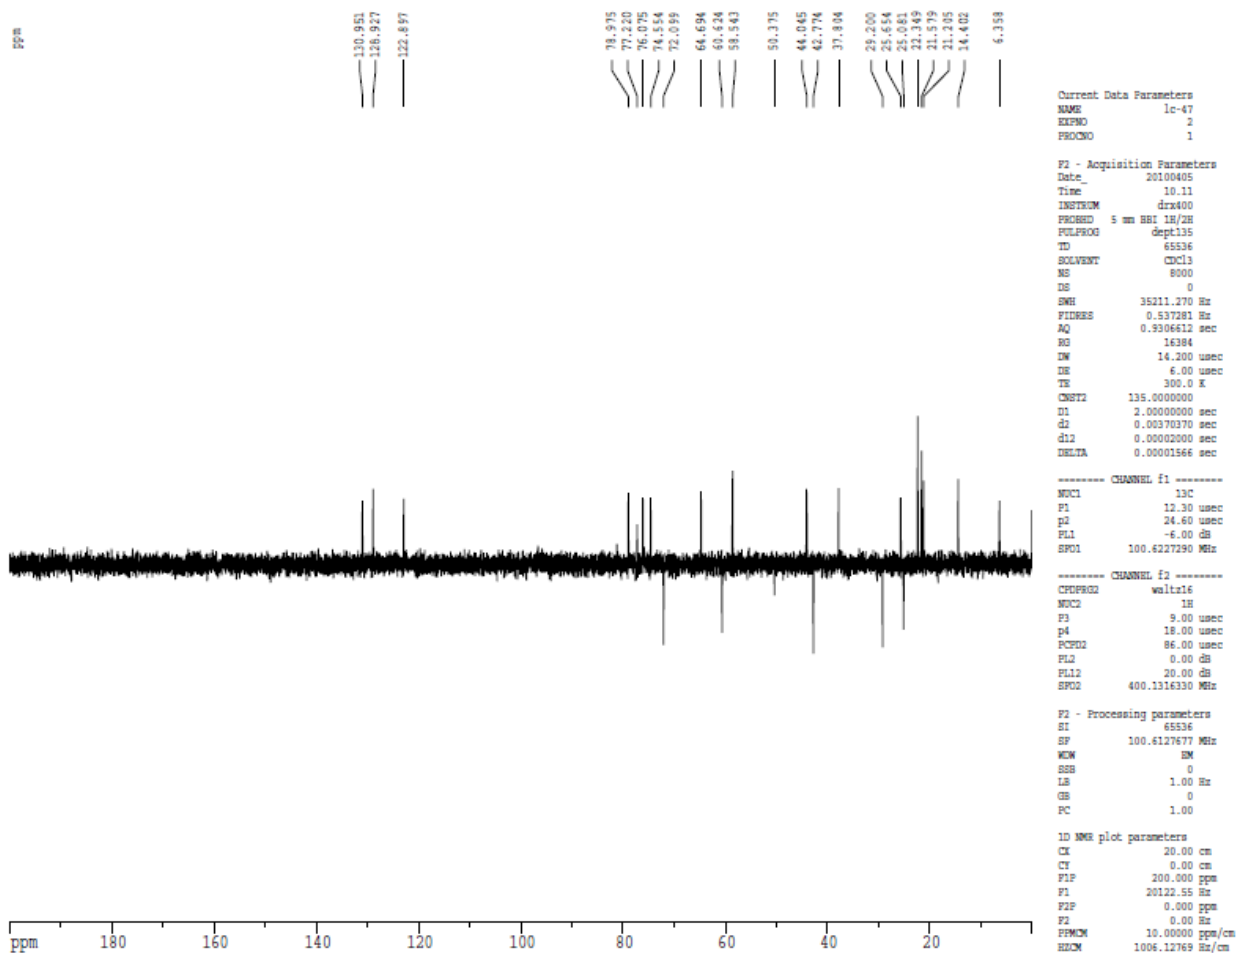

Figure S37. HSQC spectrum of the new compound 5.

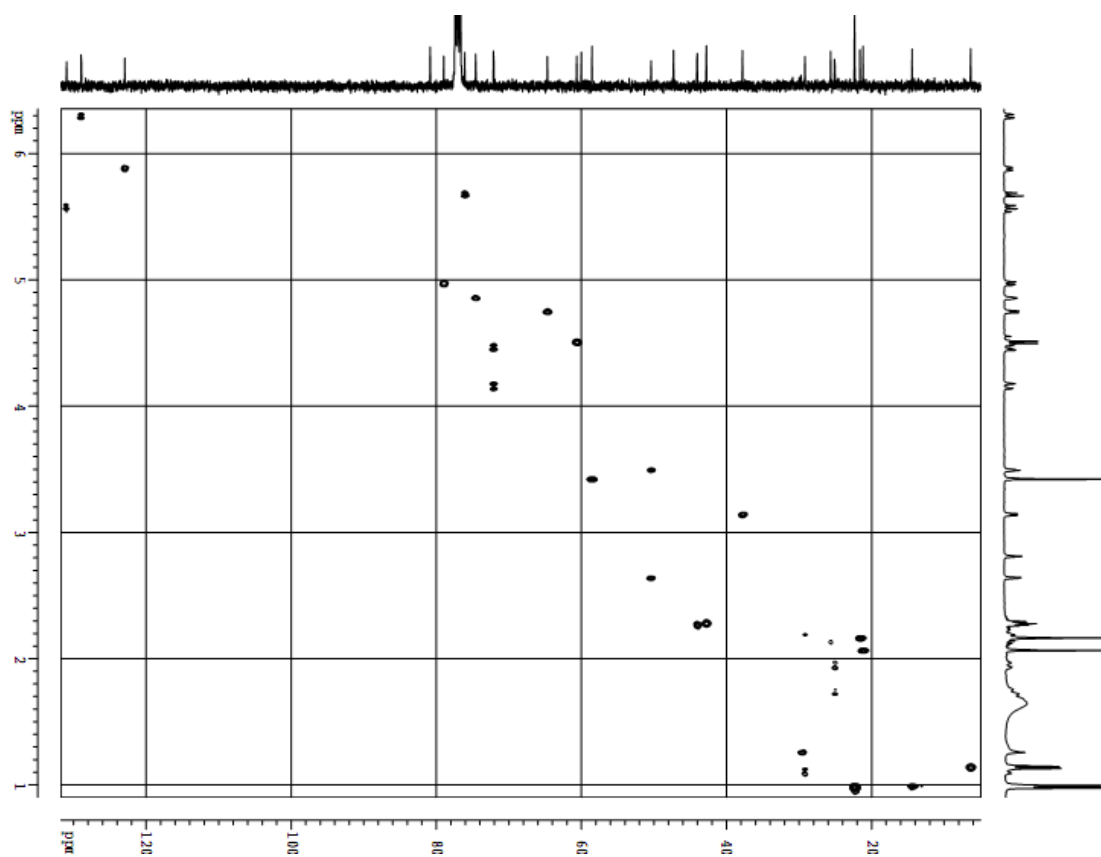Figure S38.  $^1\text{H}$ - $^1\text{H}$  COSY spectrum of the new compound 5.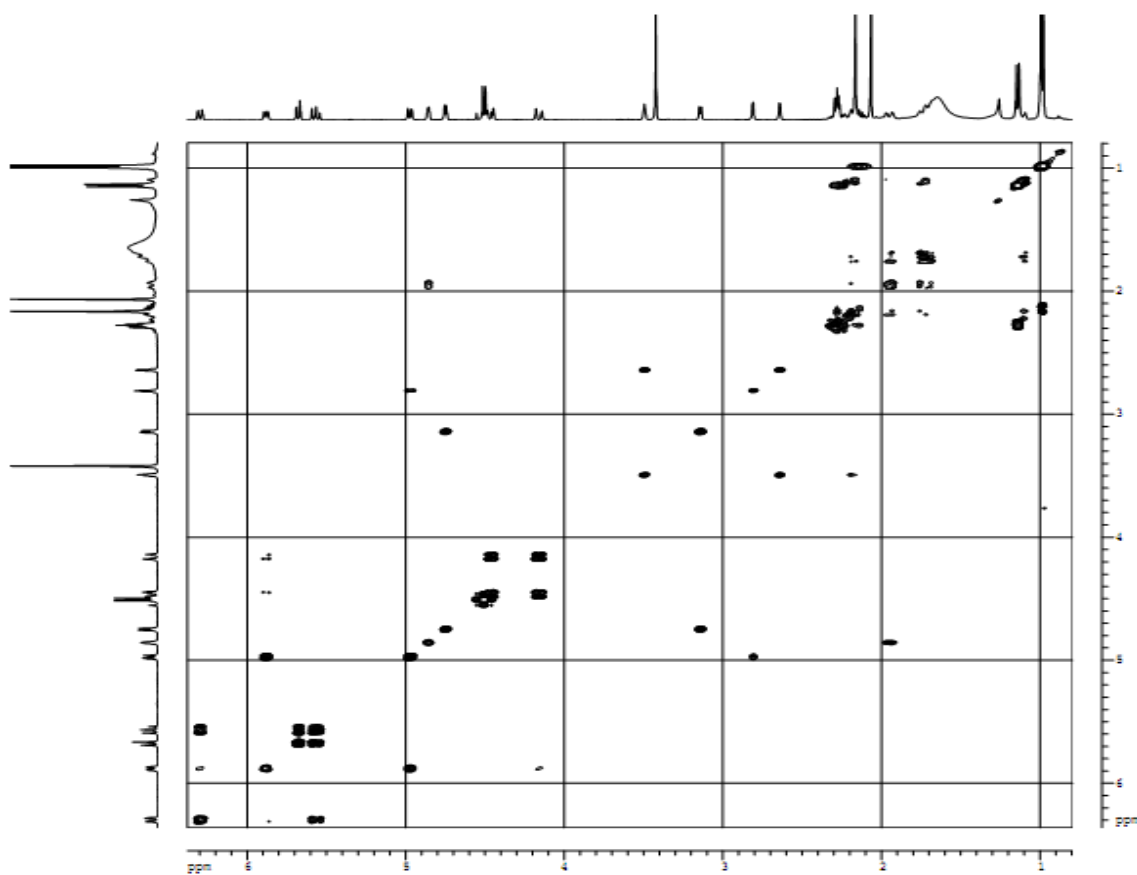

Figure S39. HMBC spectrum of the new compound 5.

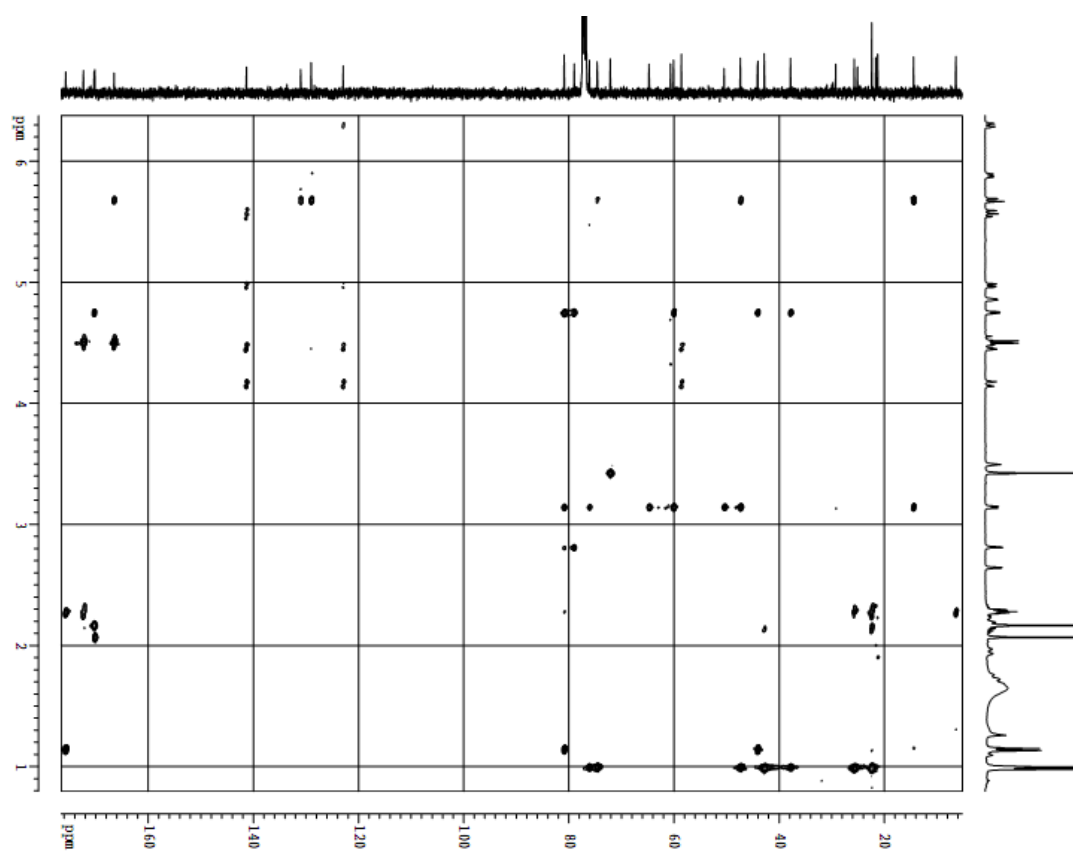

Figure S40. NOESY spectrum of the new compound 5.

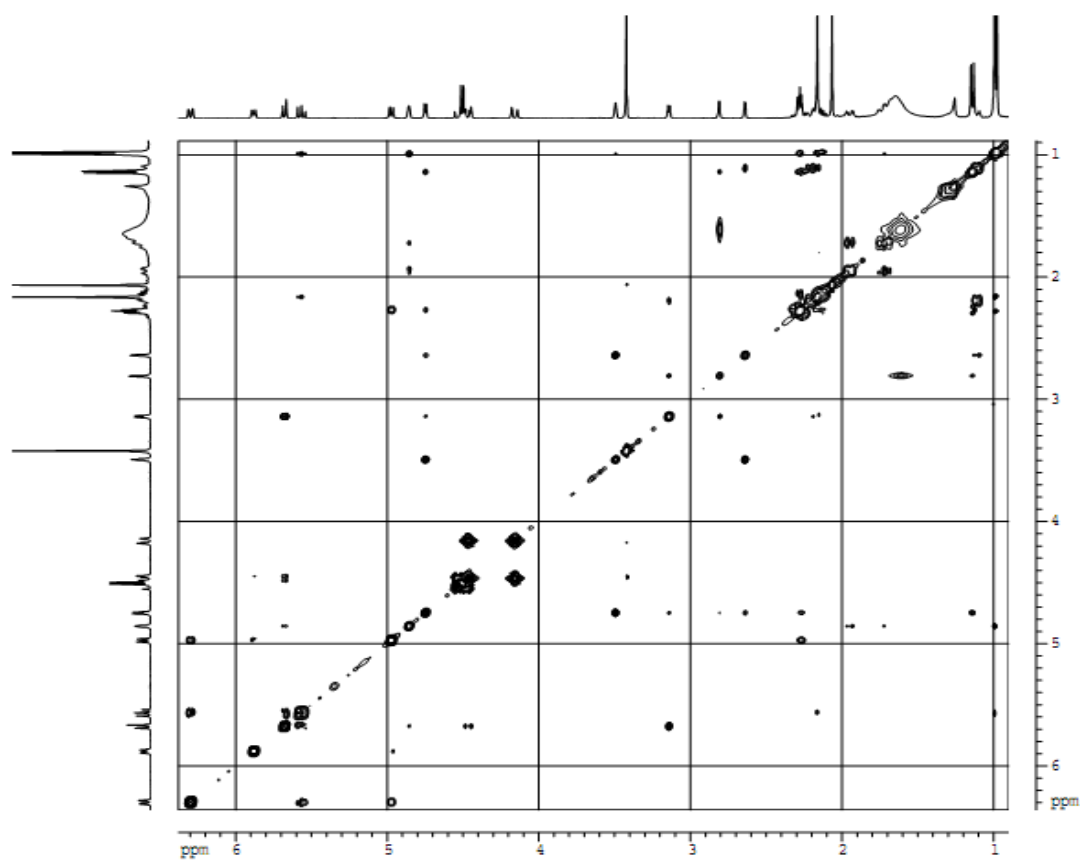



**Figure S41.** HR-ESIMS spectrum of the new compound **6**.

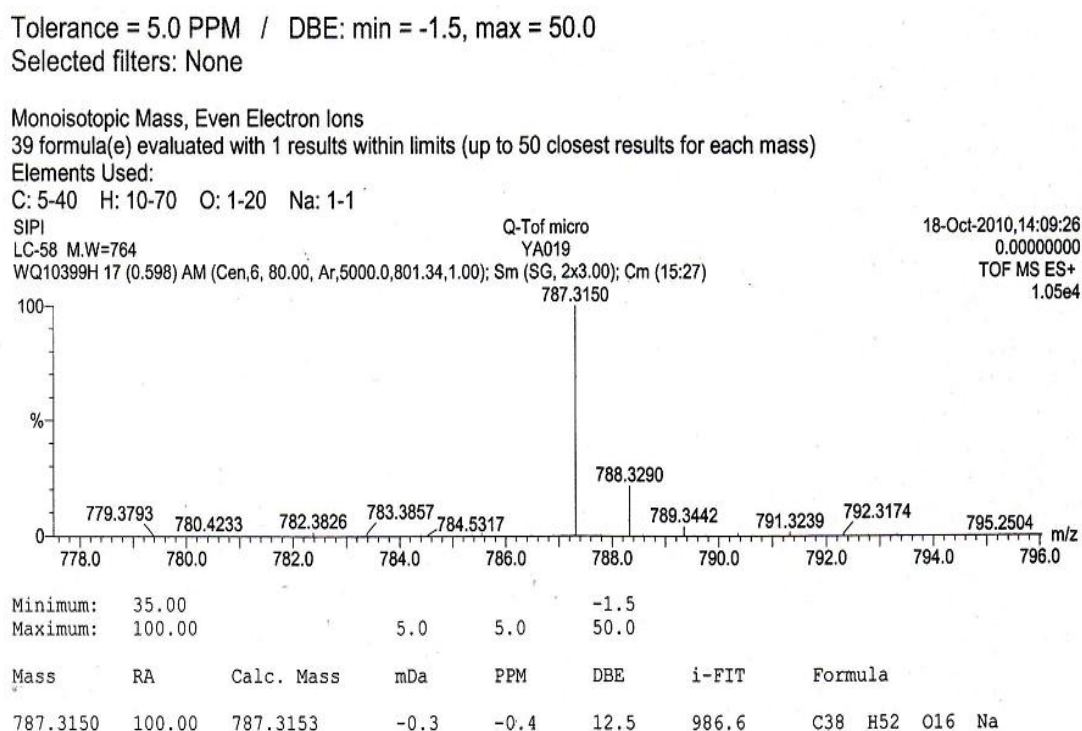

**Figure S42.** <sup>1</sup>H NMR spectrum of the new compound **6**.

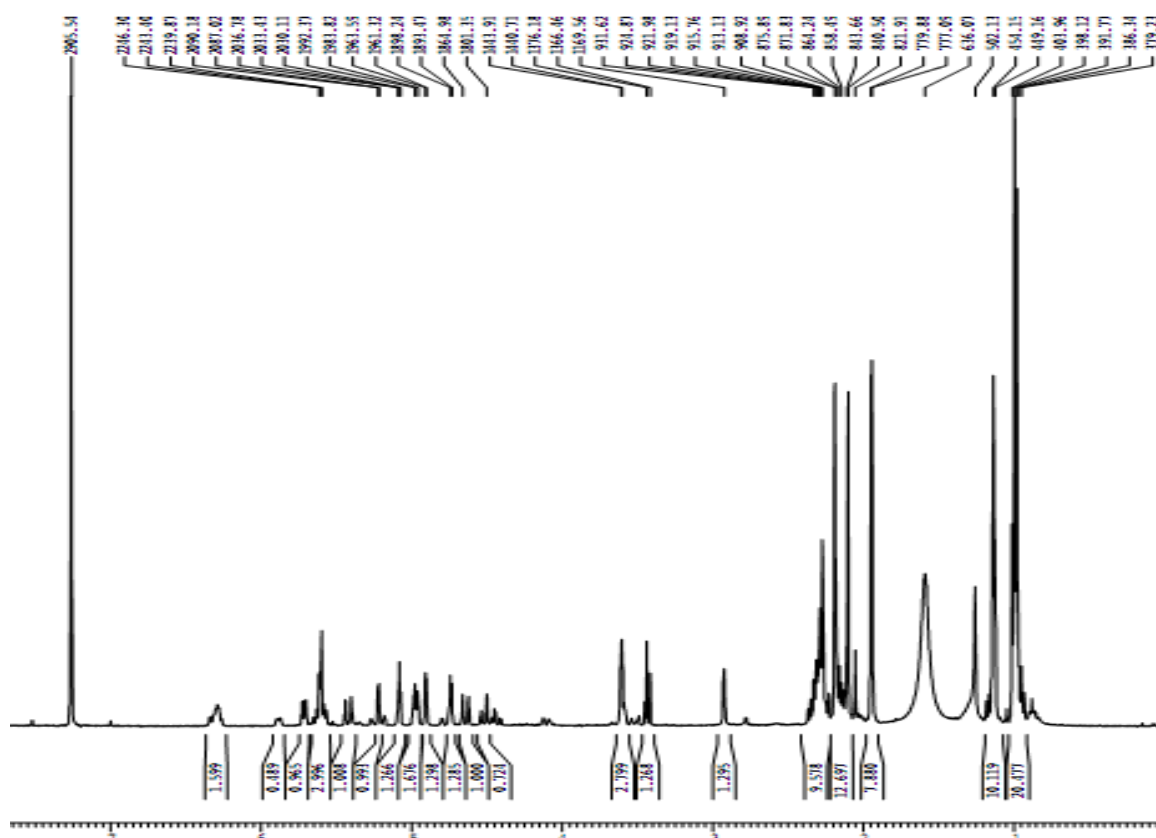

Figure S43. <sup>13</sup>C NMR spectrum of the new compound 6.

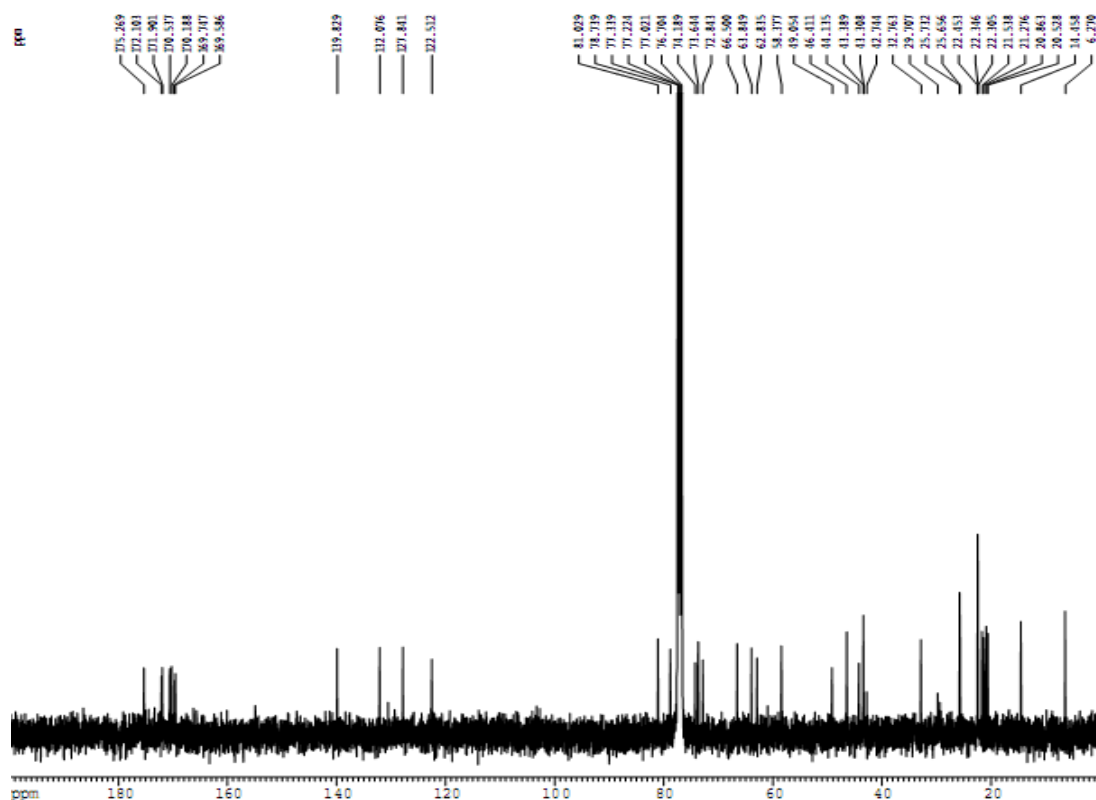

Figure S44. DEPT spectrum of the new compound 6.

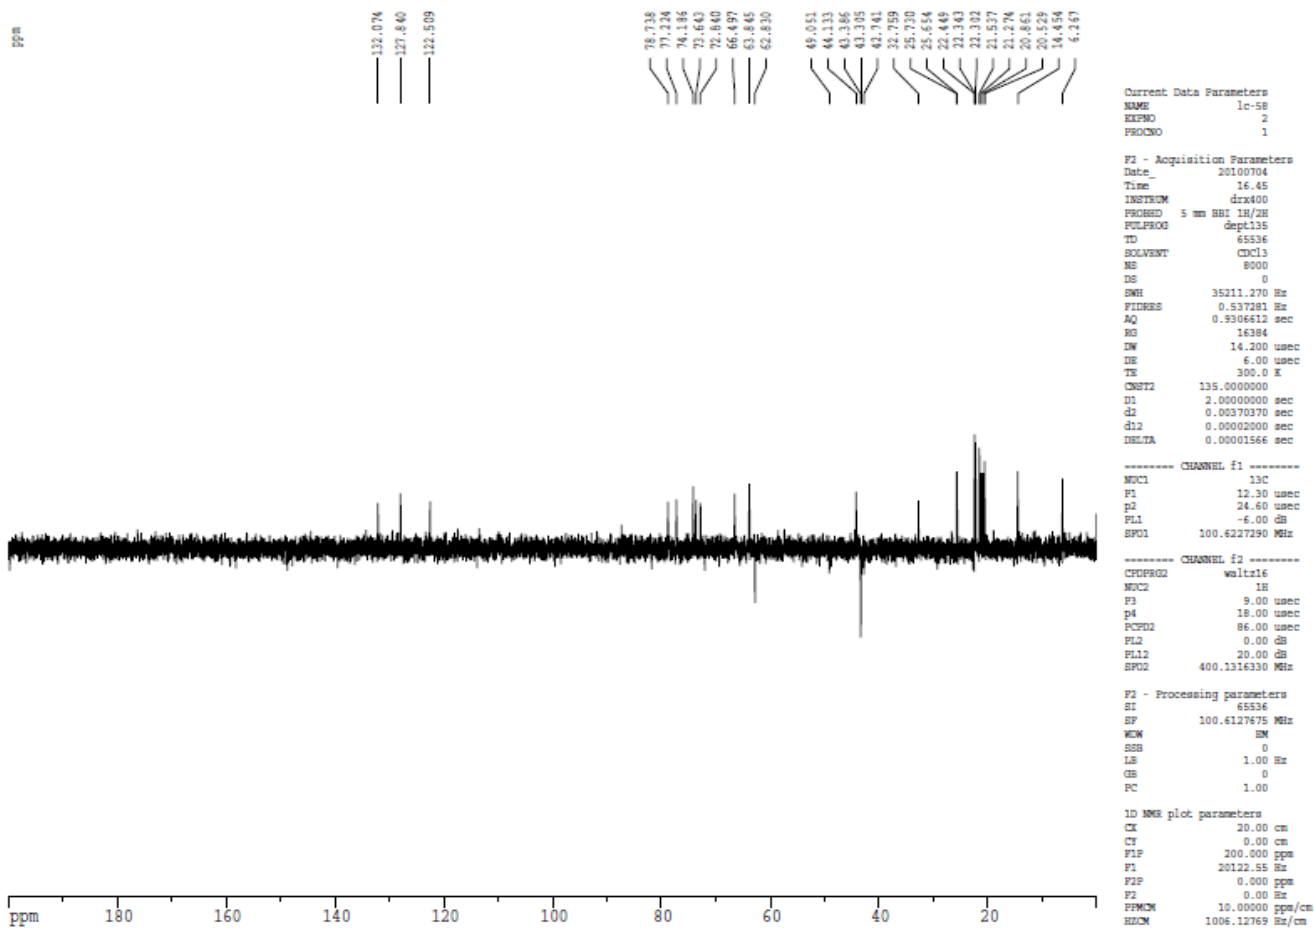

Figure S45. HSQC spectrum of the new compound 6.

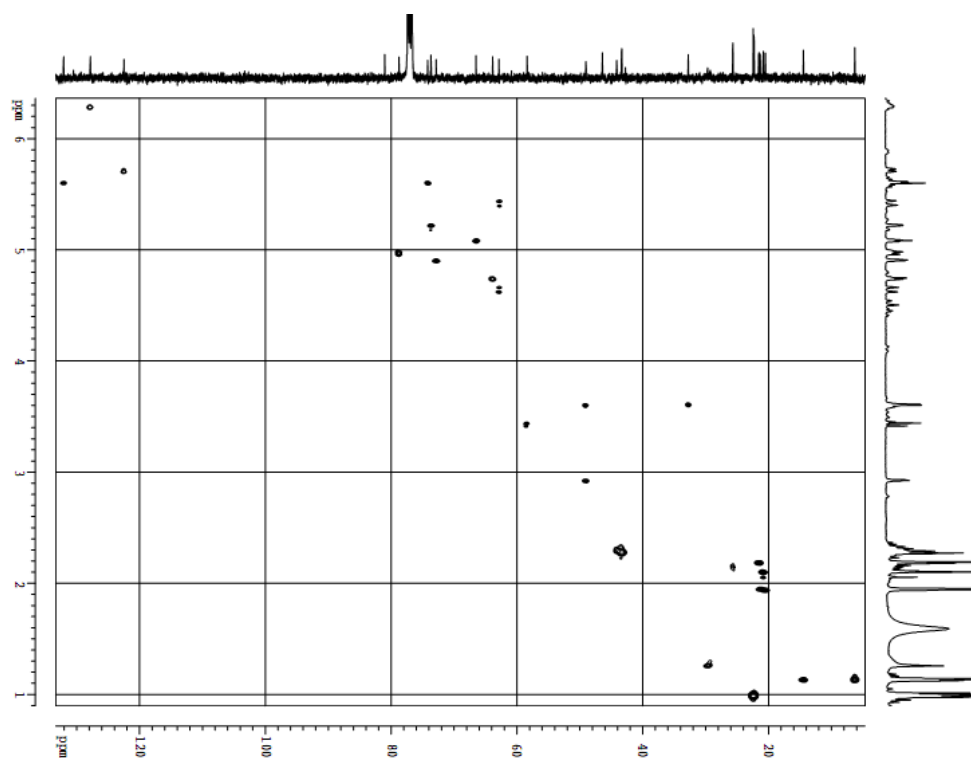Figure S46.  $^1\text{H}$ - $^1\text{H}$  COSY spectrum of the new compound 6.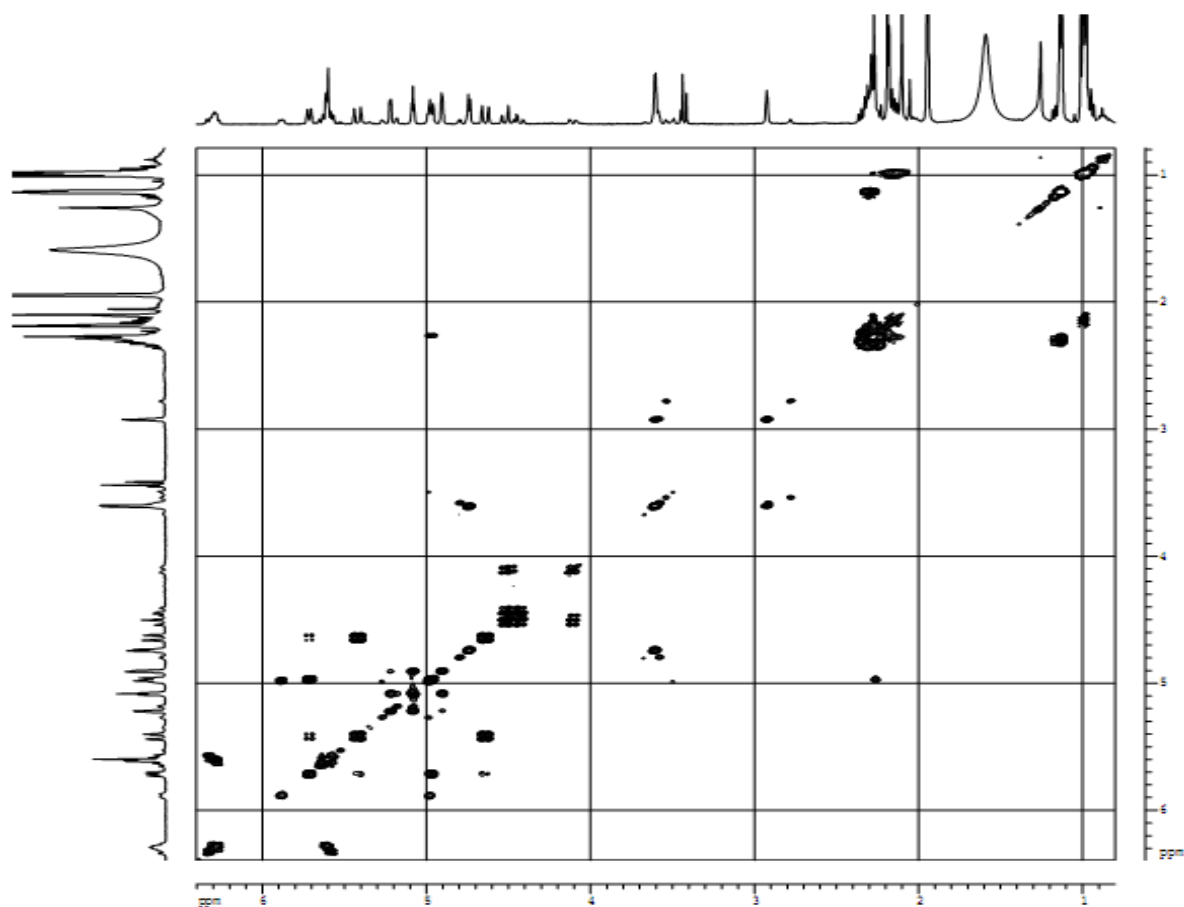

Figure S47. HMBC spectrum of the new compound 6.

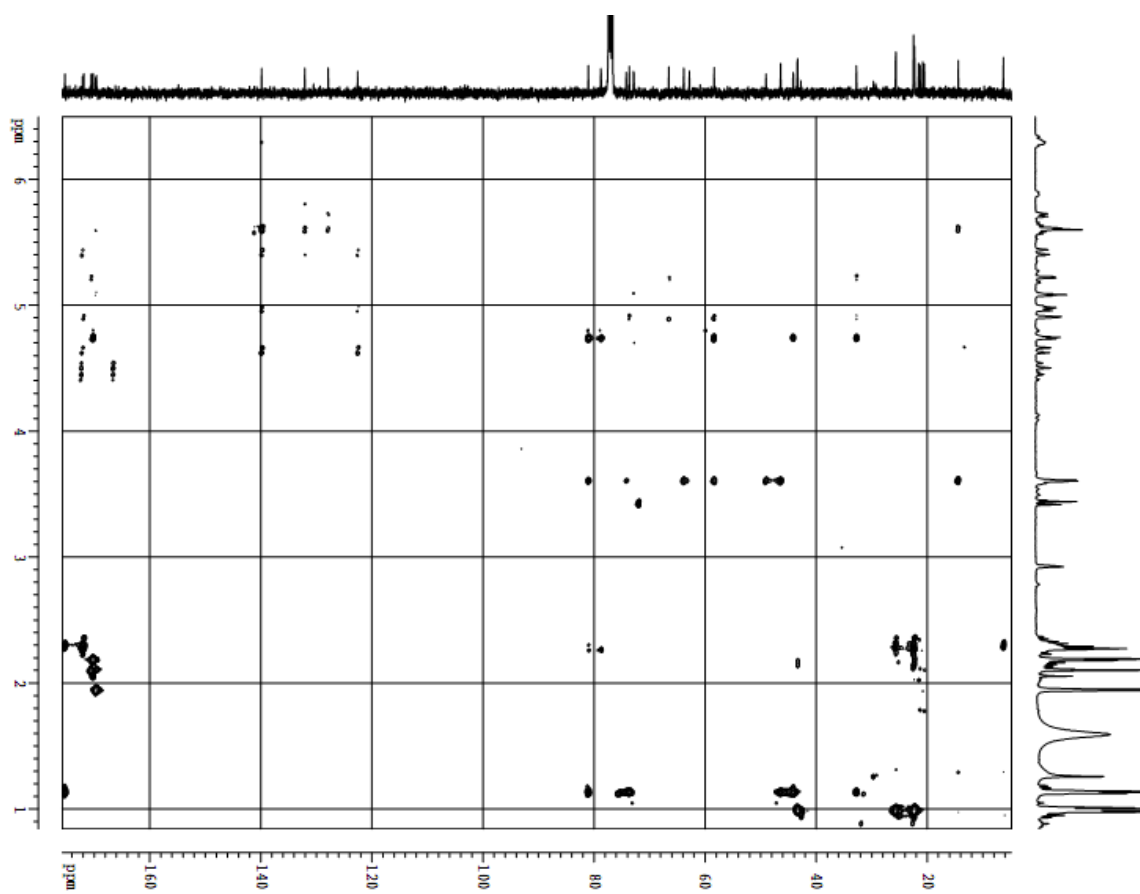

Figure S48. NOESY spectrum of the new compound 6.

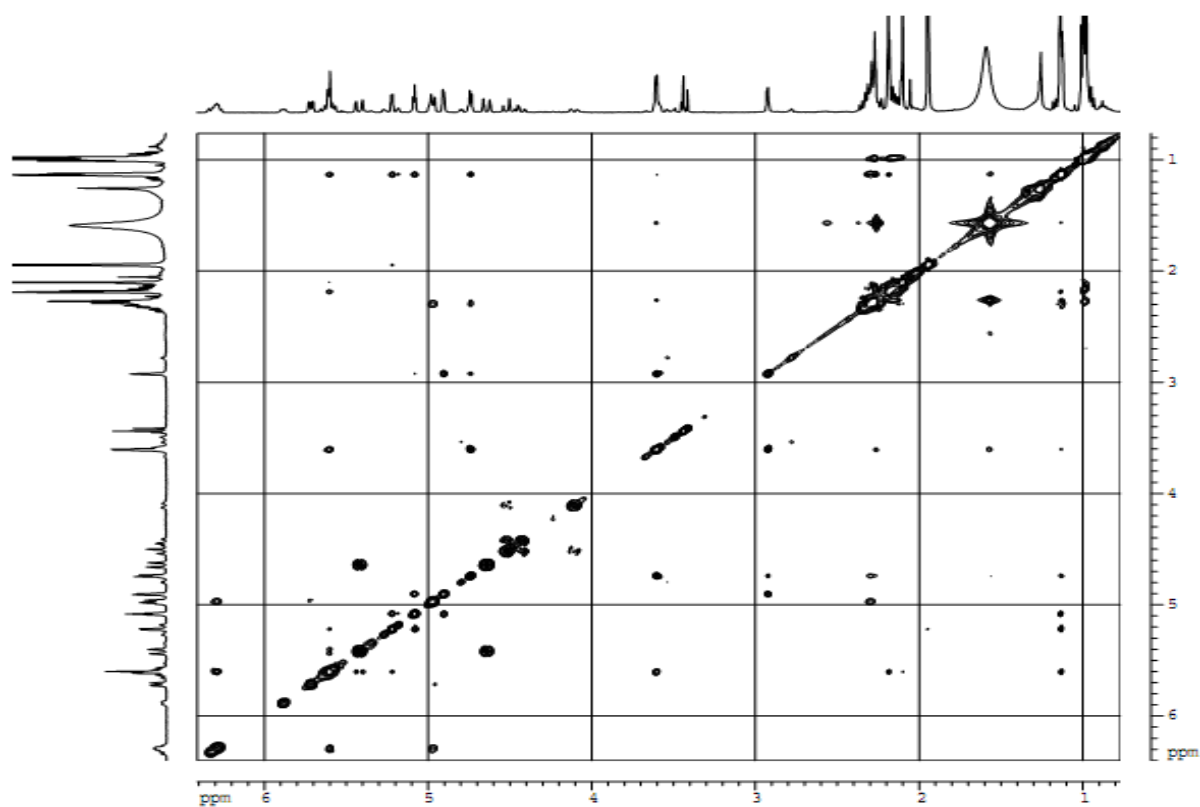

Figure S49. HRESIMS spectrum of compound 7.

Tolerance = 10.0 PPM / DBE: min = -1.5, max = 50.0  
 Selected filters: None

Monoisotopic Mass, Even Electron Ions

25 formula(e) evaluated with 1 results within limits (up to 50 closest results for each mass)

Elements Used:

C: 10-38 H: 10-60 O: 5-18 Na: 1-1

SIPI

JM-110 M.W=722

WQ12-442H2 18 (0.621) AM (Cen,4, 80.00, Ar,5000.0,775.30,0.70); Sm (SG, 2x1.00); Cm (9:18)

Q-ToF micro

YA019

04-Nov-2012,11:40:33

TOF MS ES+

7.46e3

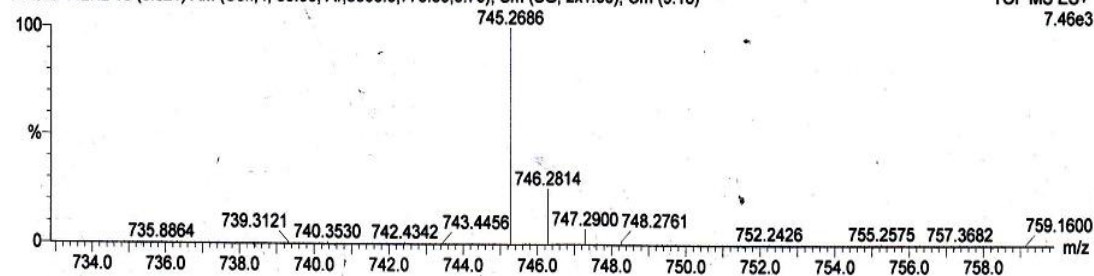

Minimum: 65.00  
 Maximum: 100.00

| Mass     | RA     | Calc. Mass | mDa | PPM | DBE  | i-FIT | Formula        |
|----------|--------|------------|-----|-----|------|-------|----------------|
| 745.2686 | 100.00 | 745.2684   | 0.2 | 0.3 | 12.5 | 233.9 | C35 H46 O16 Na |

Figure S50. <sup>1</sup>H NMR spectrum of compound 7 in CDCl<sub>3</sub>.

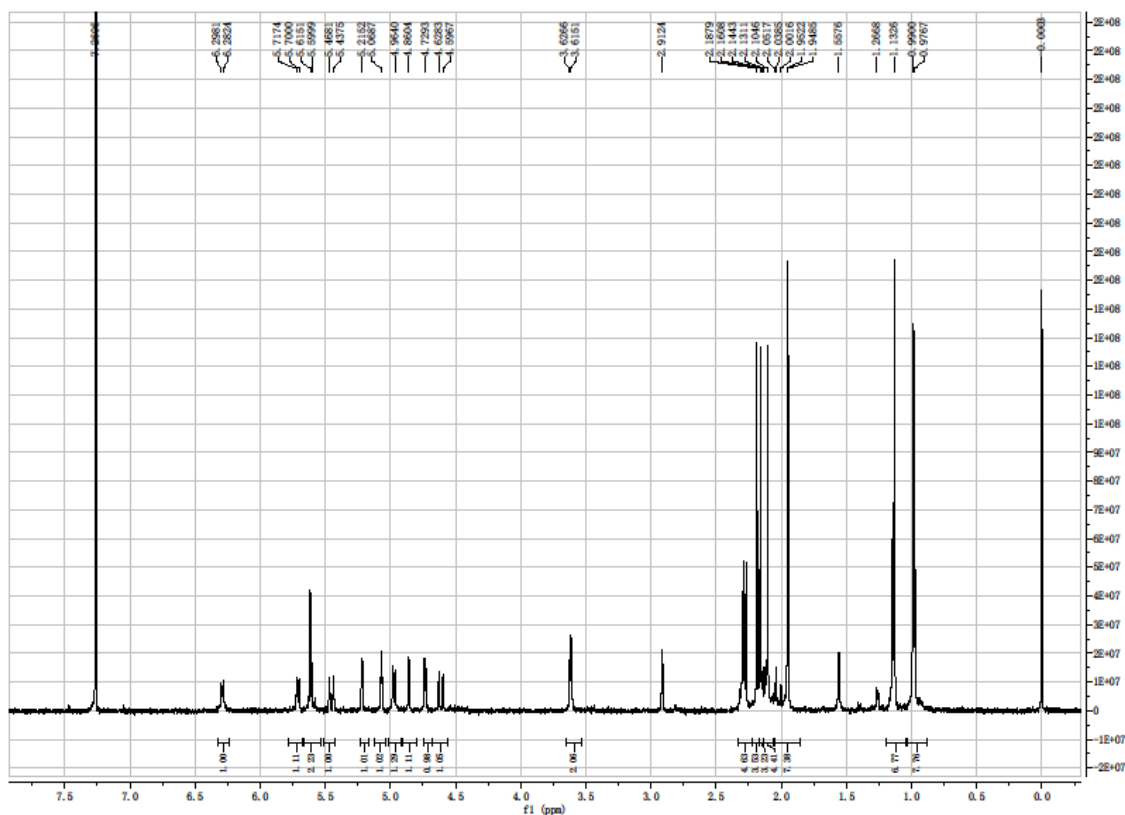

Figure S51.  $^{13}\text{C}$  NMR spectrum of compound **7** in  $\text{CDCl}_3$ .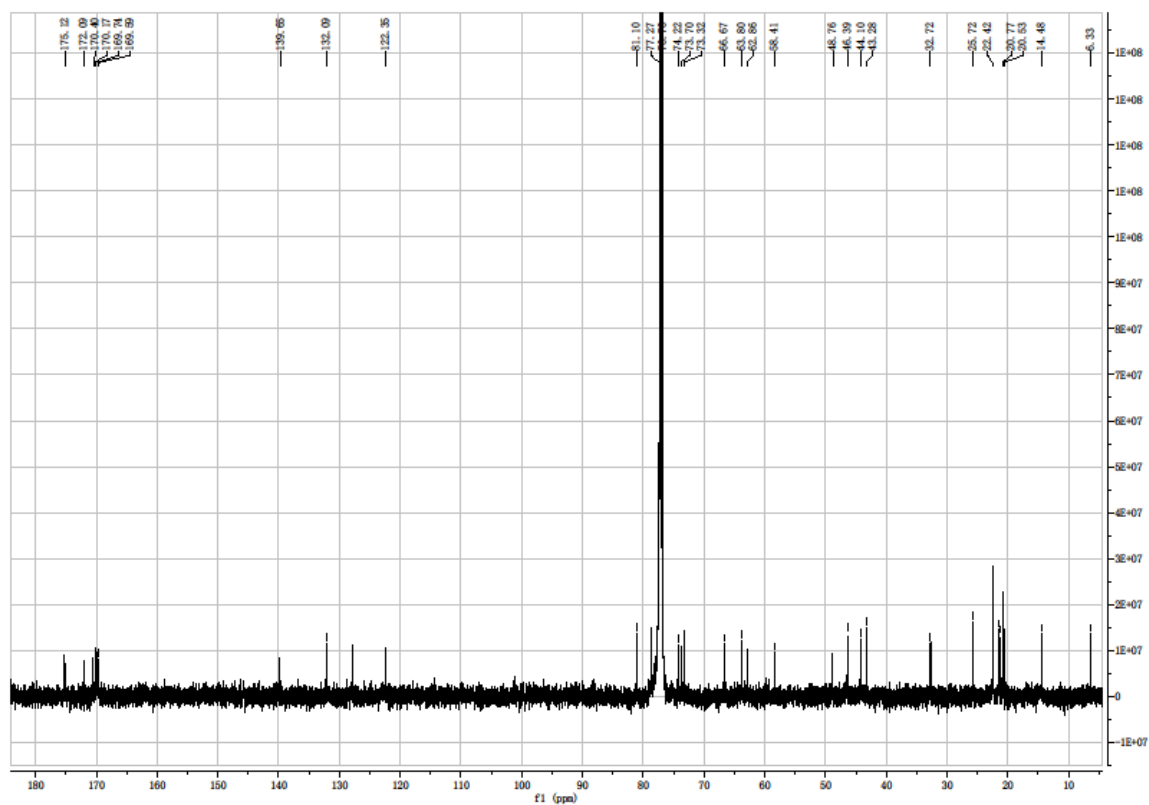Figure S52. DEPT spectrum of compound **7** in  $\text{CDCl}_3$ .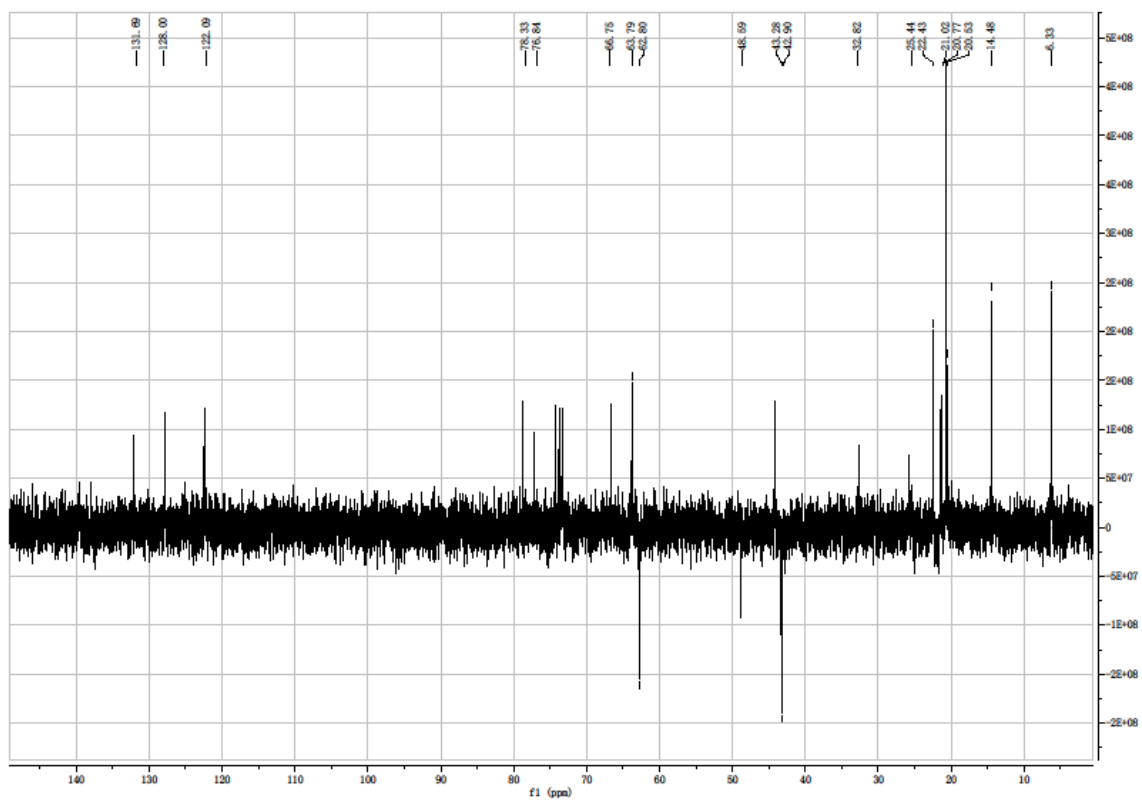

Figure S53. HSQC spectrum of compound 7 in CDCl<sub>3</sub>.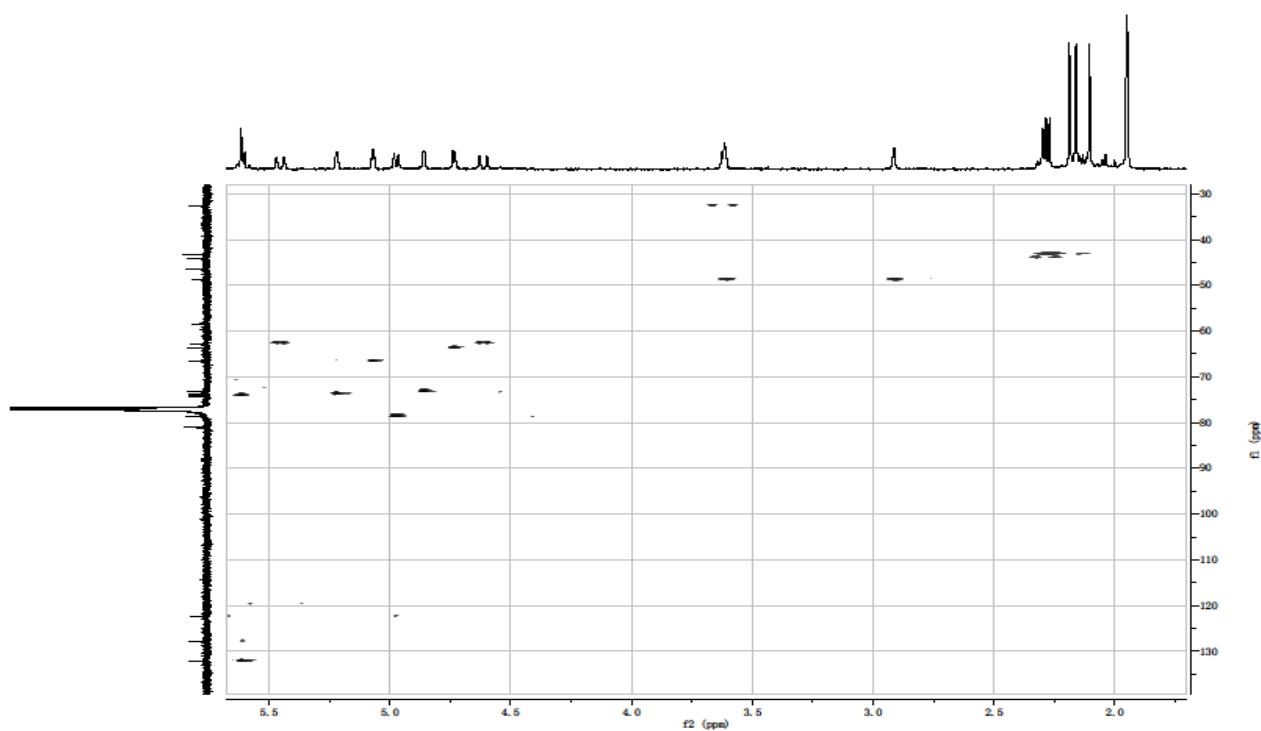Figure S54. <sup>1</sup>H-<sup>1</sup>H COSY spectrum of compound 7 in CDCl<sub>3</sub>.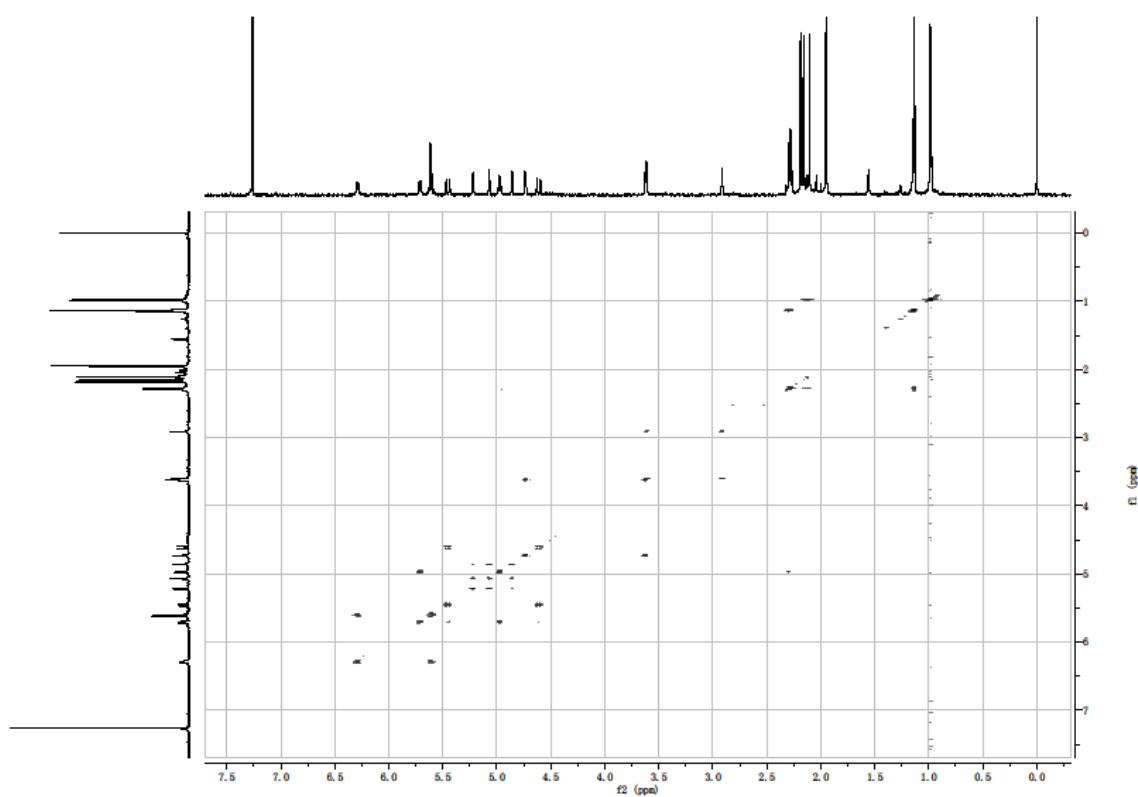

**Figure S55.** HMBC spectrum of compound **7** in CDCl<sub>3</sub>.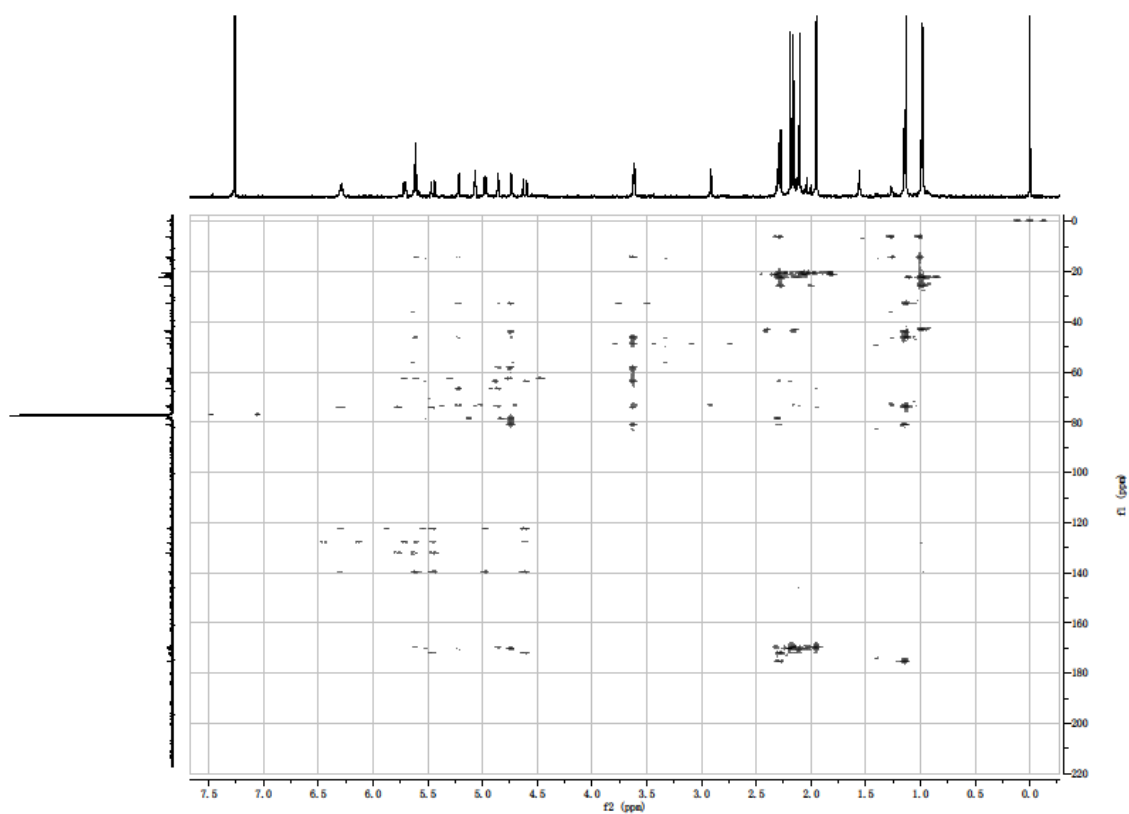**Figure S56.** NOESY spectrum of compound **7** in CDCl<sub>3</sub>.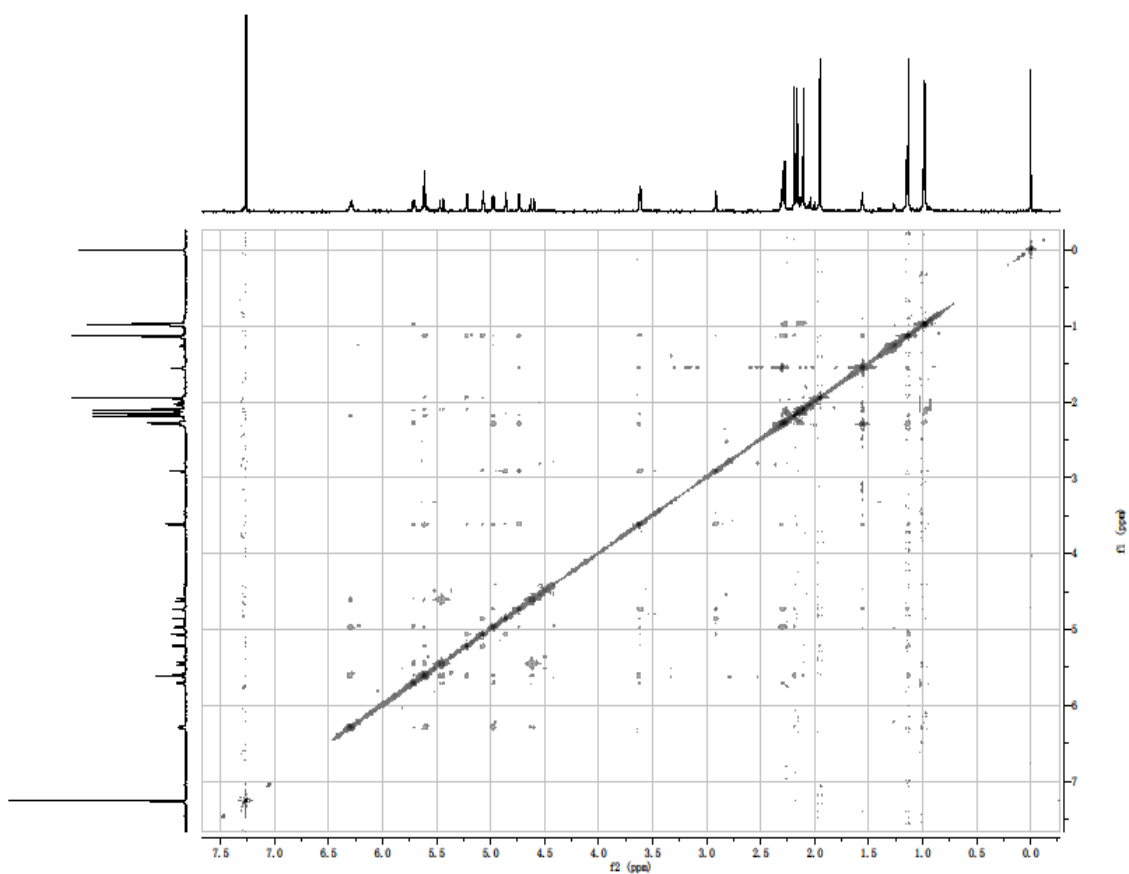



Figure S57. HR-ESIMS spectrum of the new compound 8.

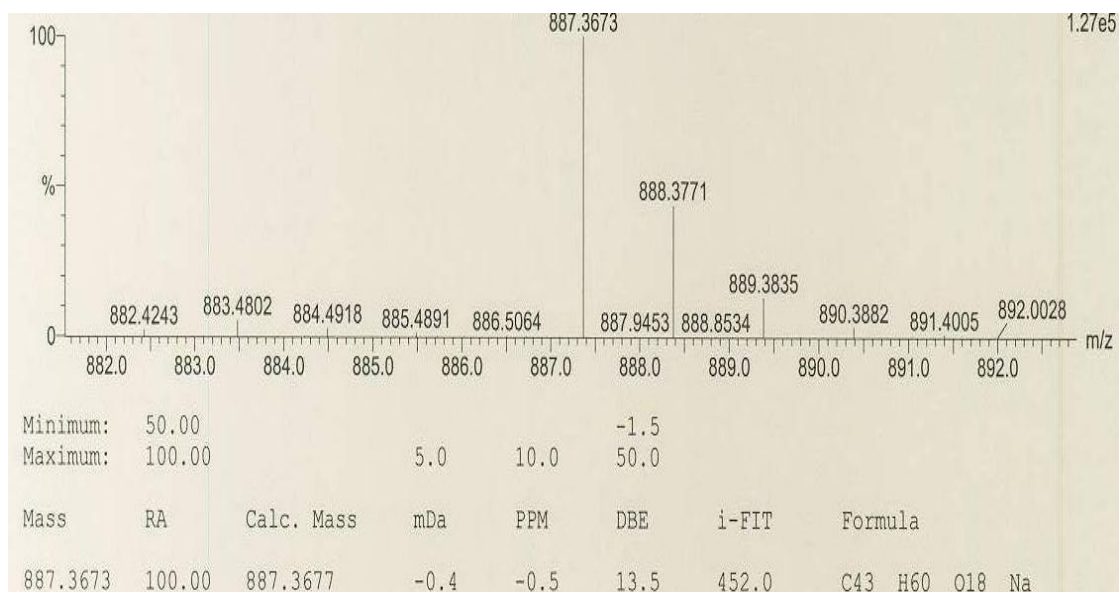

Figure S58. <sup>1</sup>H NMR spectrum of the new compound 8.

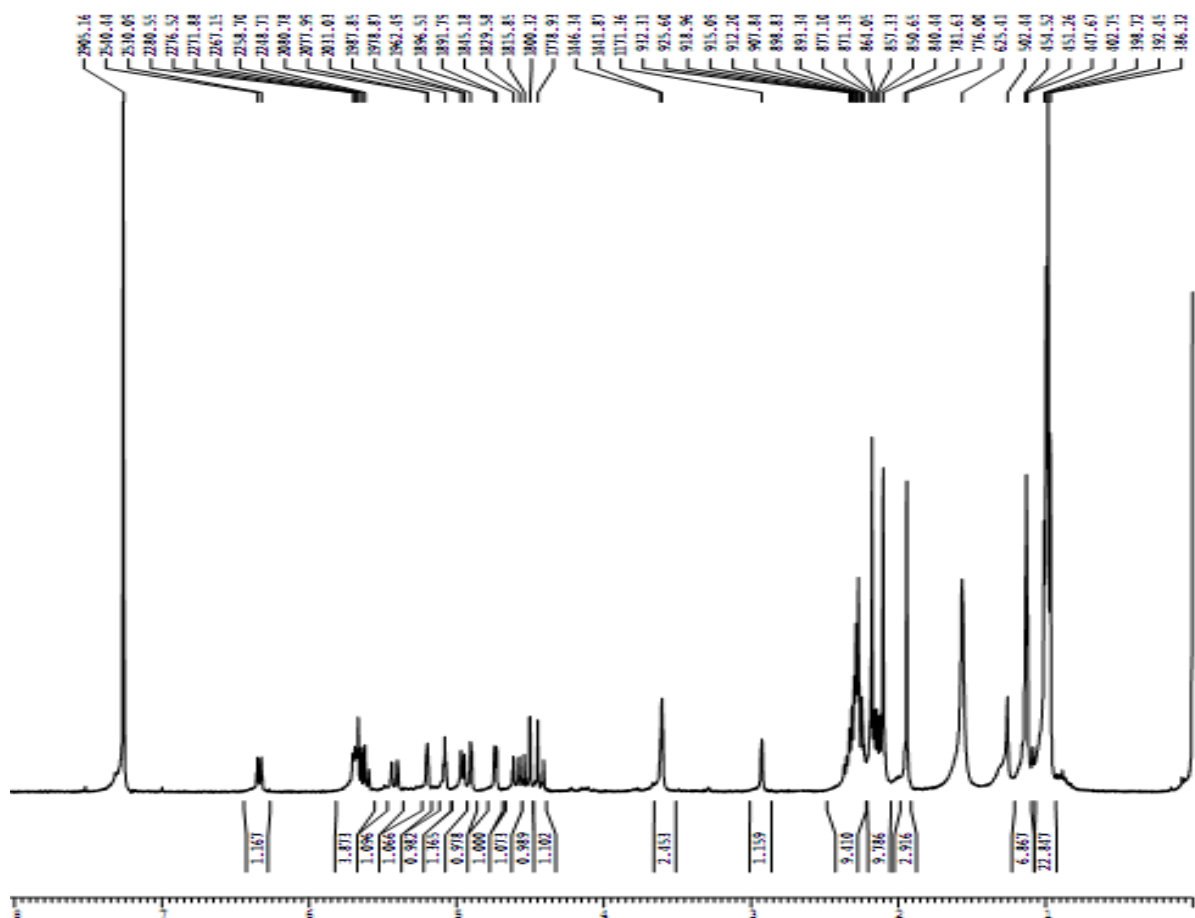

Figure S59. <sup>13</sup>C NMR spectrum of the new compound 8.

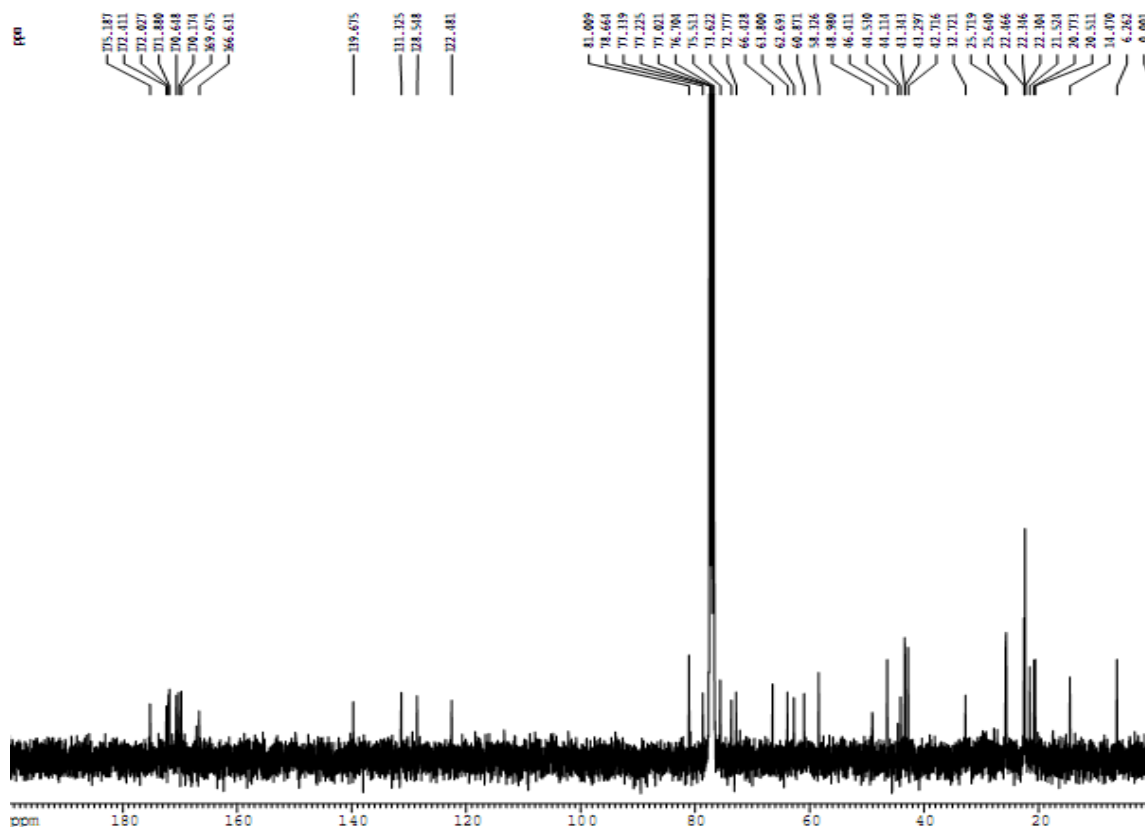

Figure S60. DEPT spectrum of the new compound 8.

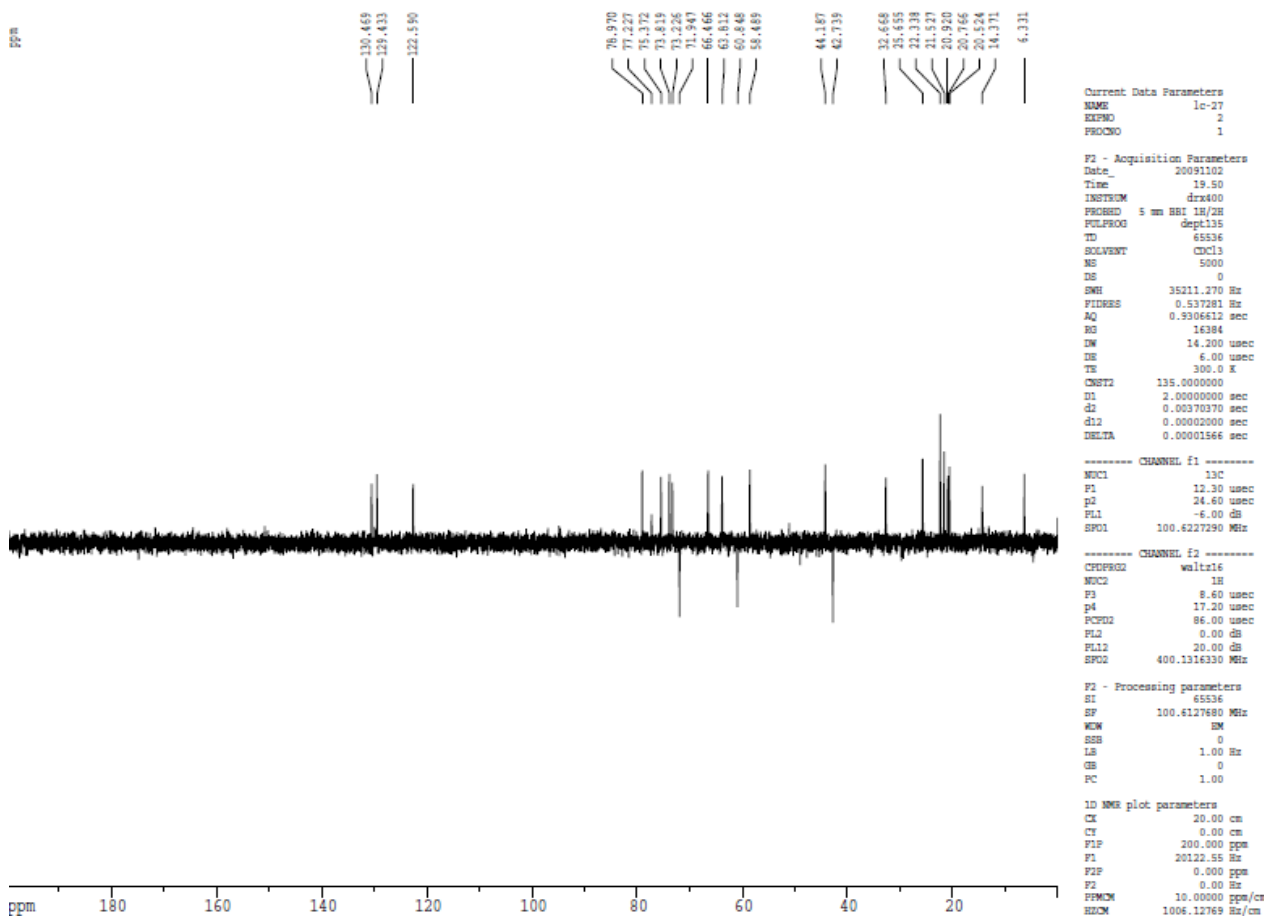

**Figure S61.** HSQC spectrum of the new compound **8**.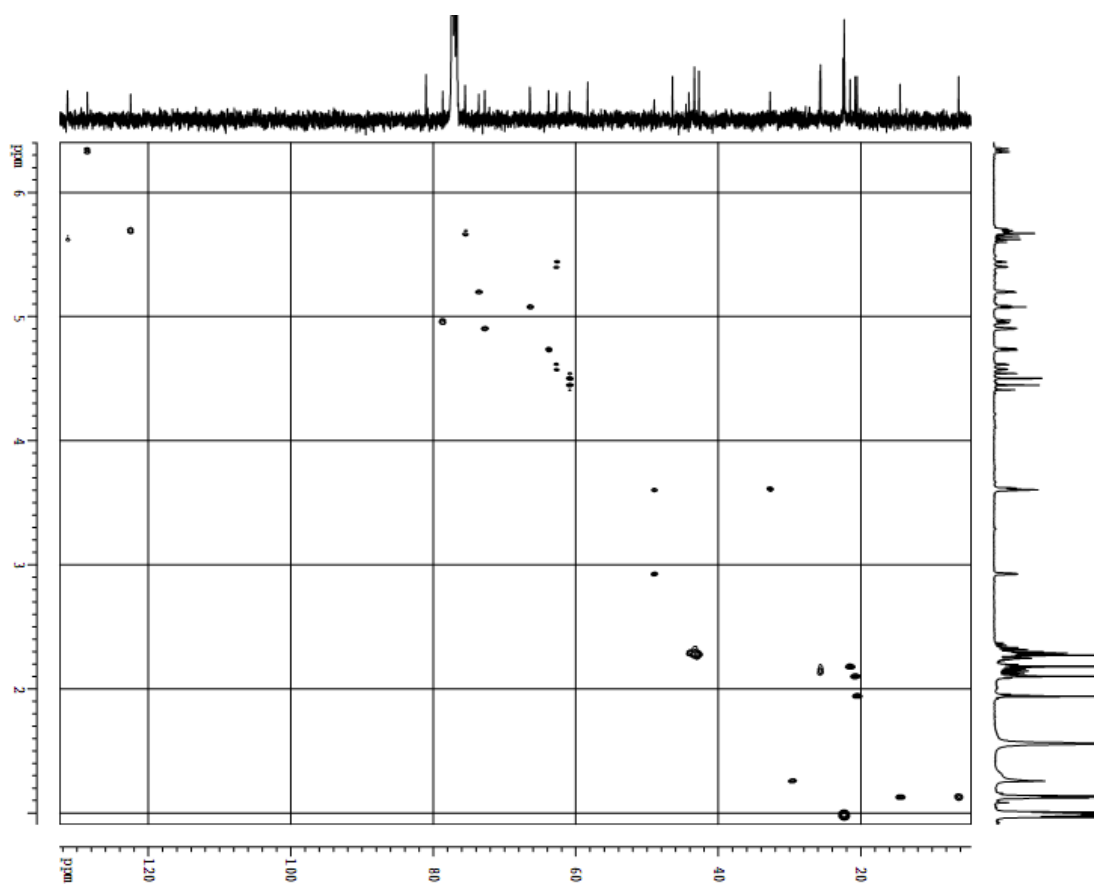**Figure S62.**  $^1\text{H}$ - $^1\text{H}$  COSY spectrum of the new compound **8**.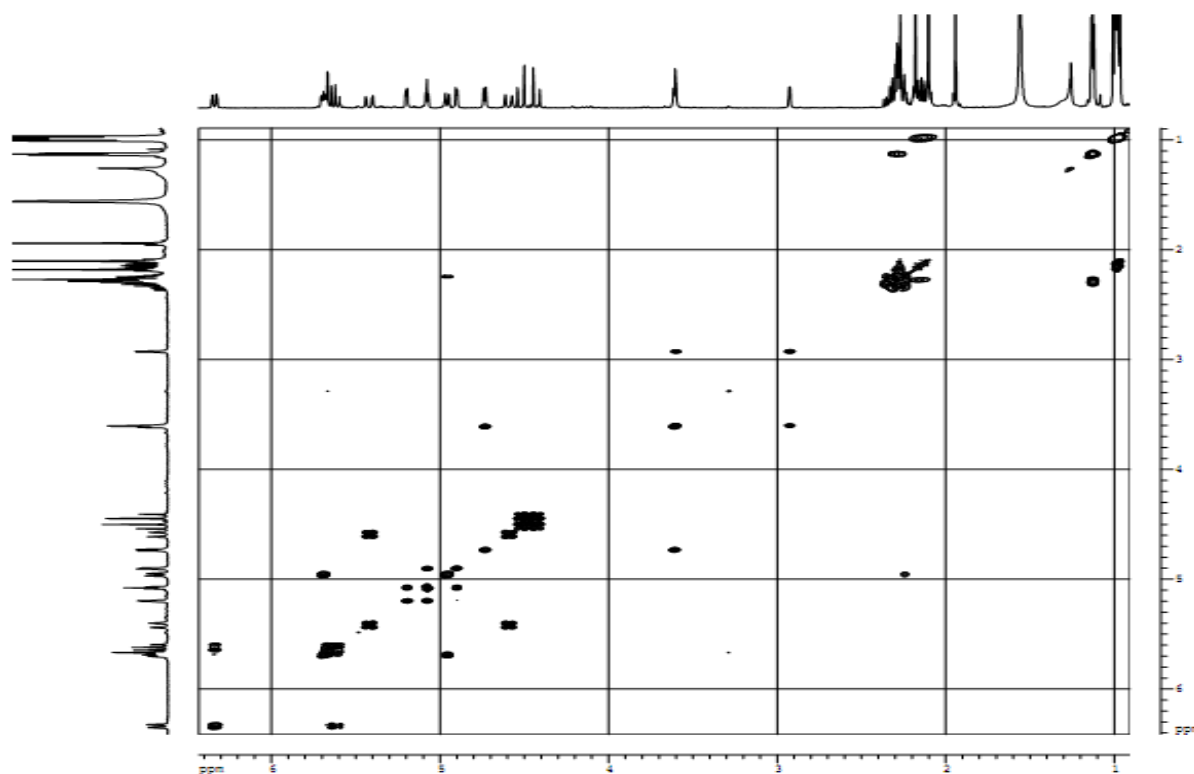

Figure S63. HMBC spectrum of the new compound 8.

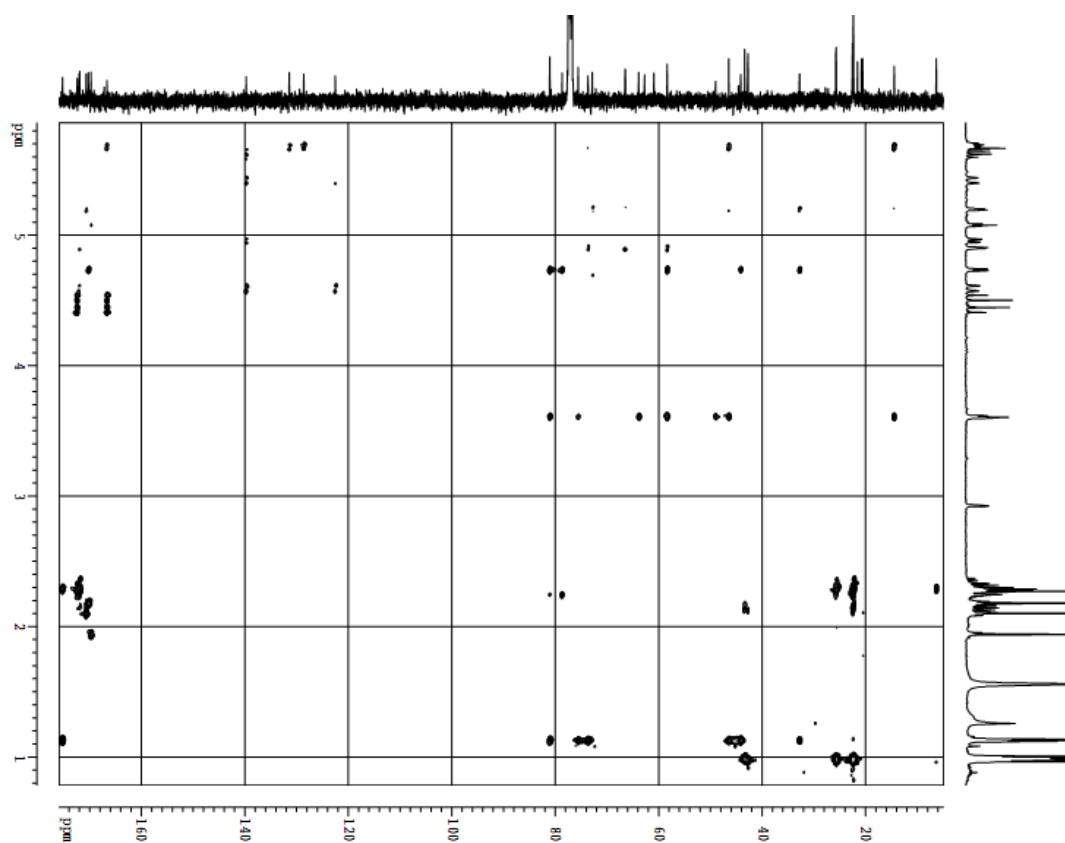

Figure S64. NOESY spectrum of the new compound 8.

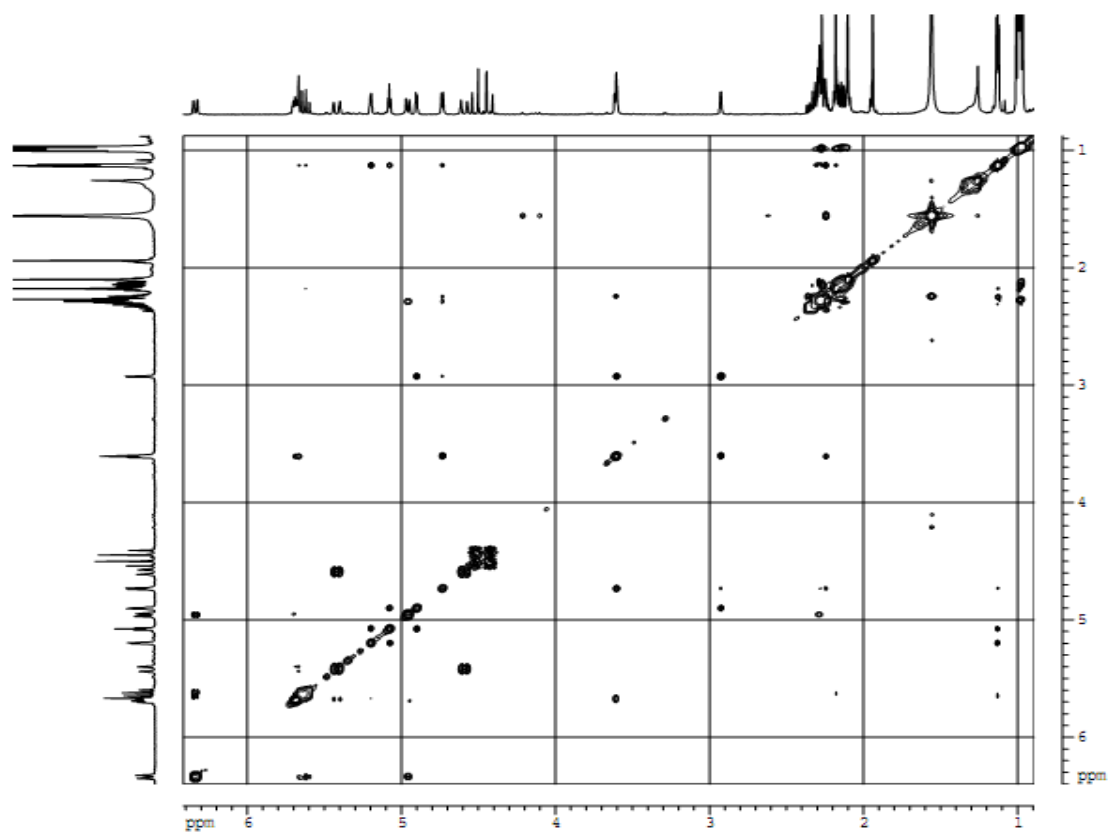

Figure S65. HRESIMS spectrum of compound 9.

Tolerance = 10.0 PPM / DBE: min = -1.5, max = 50.0  
 Selected filters: None

Monoisotopic Mass, Even Electron Ions  
 24 formula(e) evaluated with 1 results within limits (up to 50 closest results for each mass)  
 Elements Used:

C: 10-40 H: 10-60 O: 5-17 Cl: 0-1

SIP1

JM-55 M.W.=780

WQ12-448NH1 104 (3.597) AM (Cen,4, 80.00, Ar,5000.0,861.19,0.70); Sm (SG, 2x1.00); Cm (92:105)

04-Nov-2012,14:06:47

TOF MS ES-  
 4.65e3

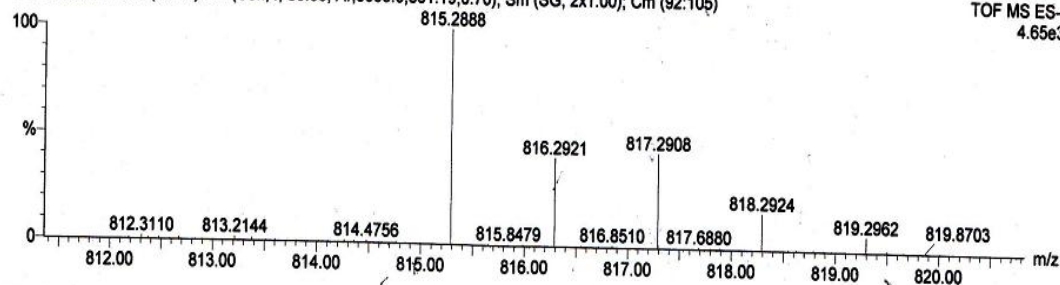

| Mass     | RA     | Calc. Mass | mDa  | PPM  | DBE  | i-FIT | Formula        |
|----------|--------|------------|------|------|------|-------|----------------|
| 815.2888 | 100.00 | 815.2893   | -0.5 | -0.6 | 12.5 | 2.8   | C38 H52 O17 Cl |

Figure S66. <sup>1</sup>H NMR spectrum of compound 9 in CDCl<sub>3</sub>.

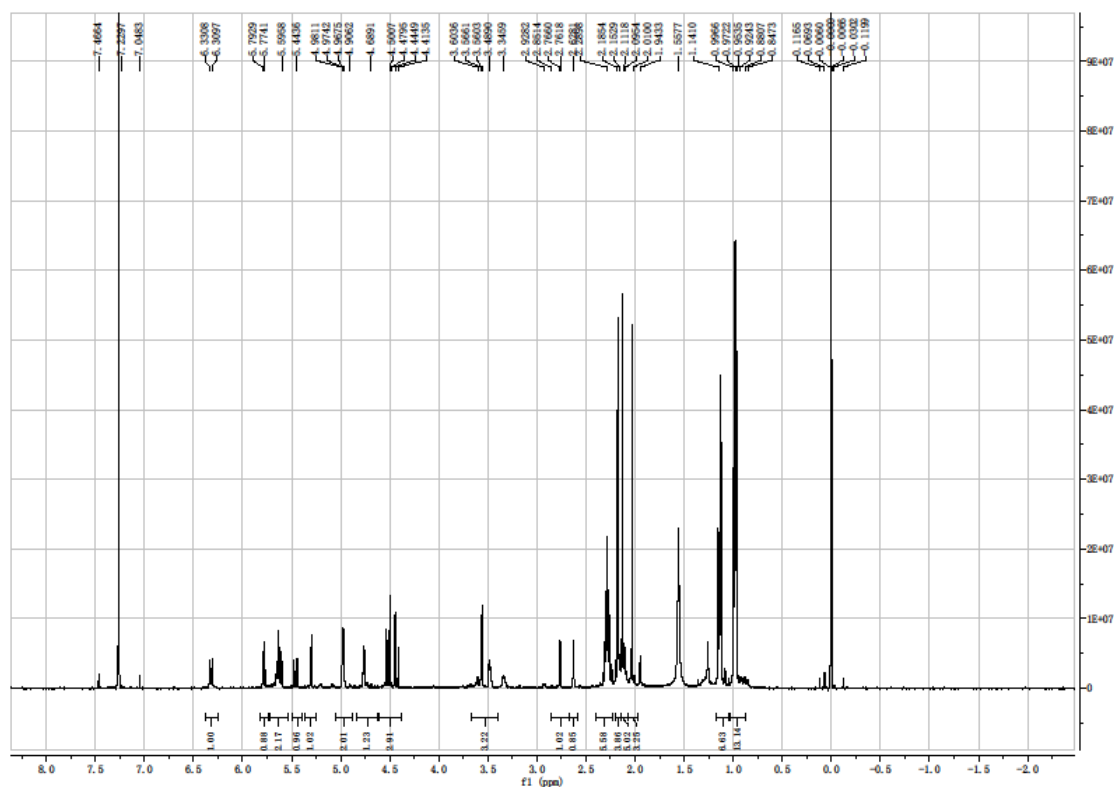

Figure S67. <sup>13</sup>C NMR spectrum of compound 9 in CDCl<sub>3</sub>.

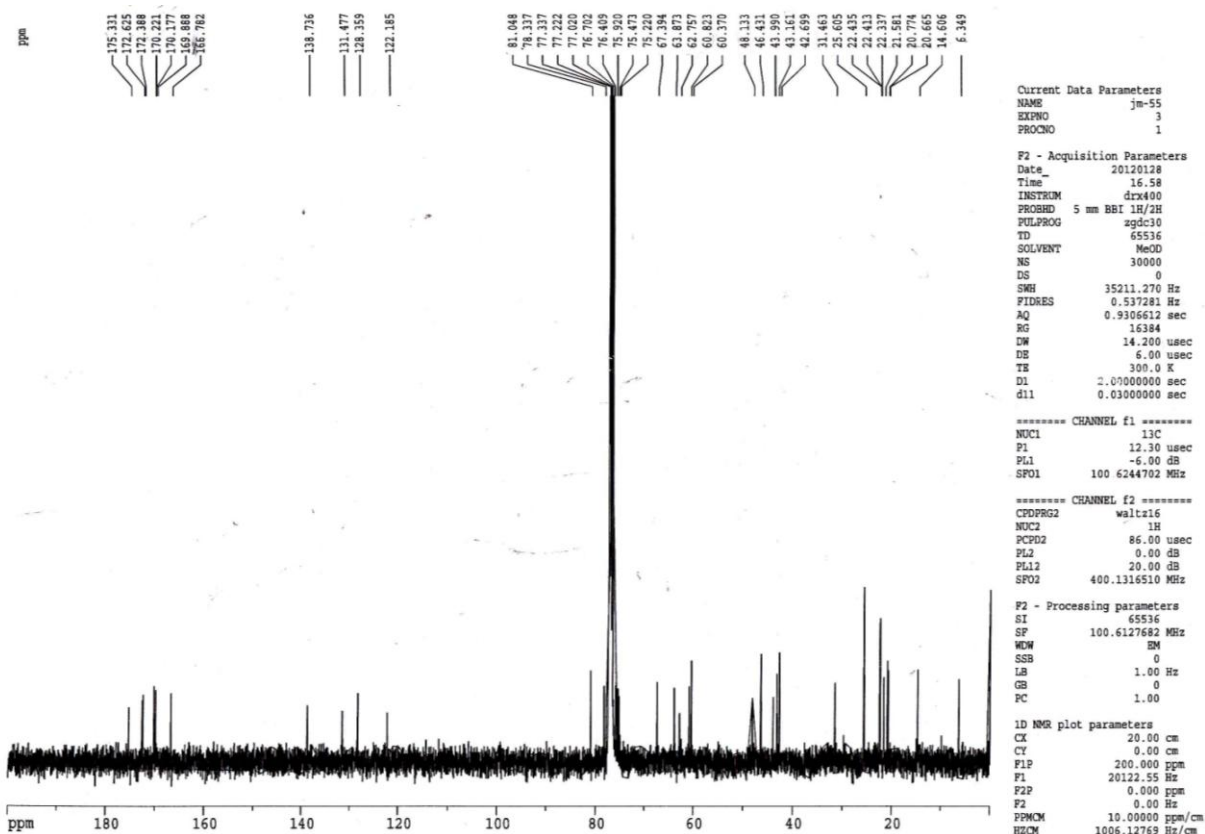

Figure S68. DEPT spectrum of compound 9 in CDCl<sub>3</sub>.

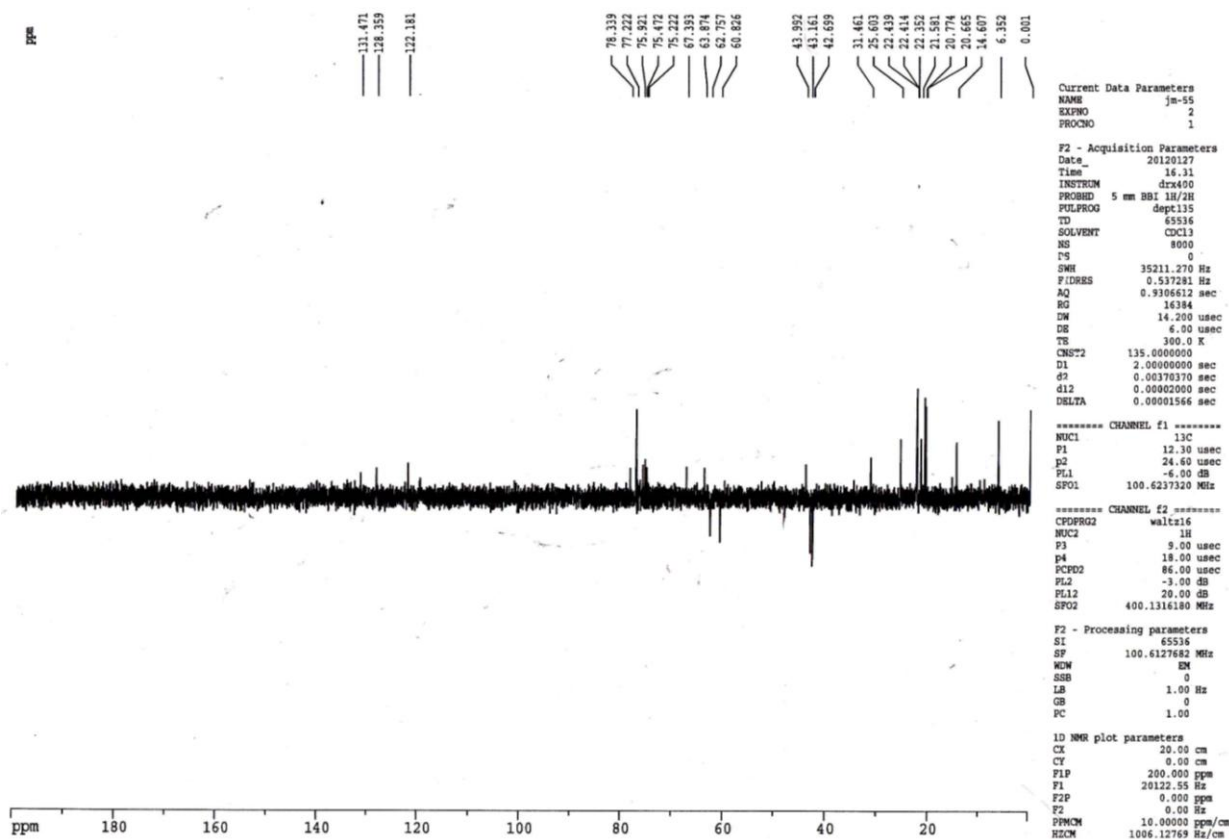

Figure S69. HSQC spectrum of compound **9** in CDCl<sub>3</sub>.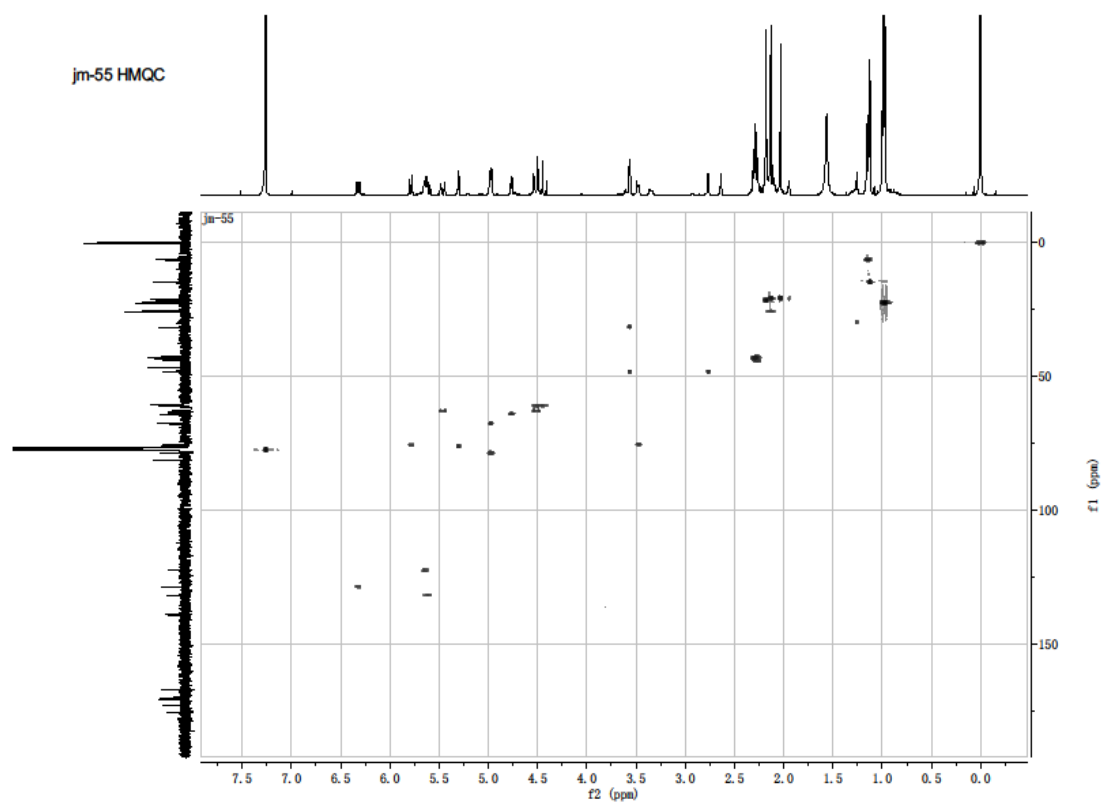Figure S70. <sup>1</sup>H-<sup>1</sup>H COSY spectrum of compound **9** in CDCl<sub>3</sub>.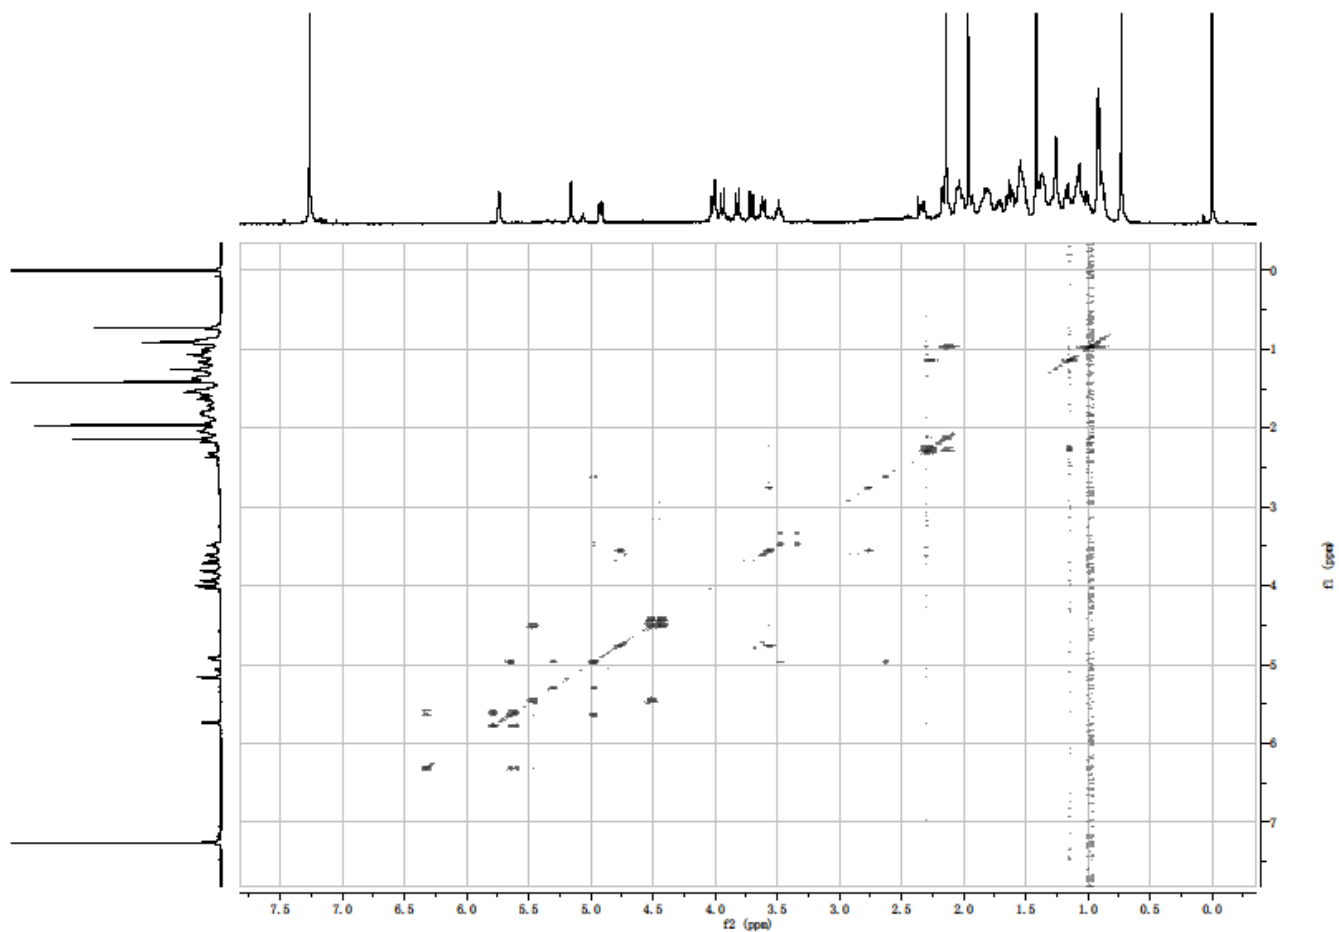

Figure S71. HMBC spectrum of compound **9** in CDCl<sub>3</sub>.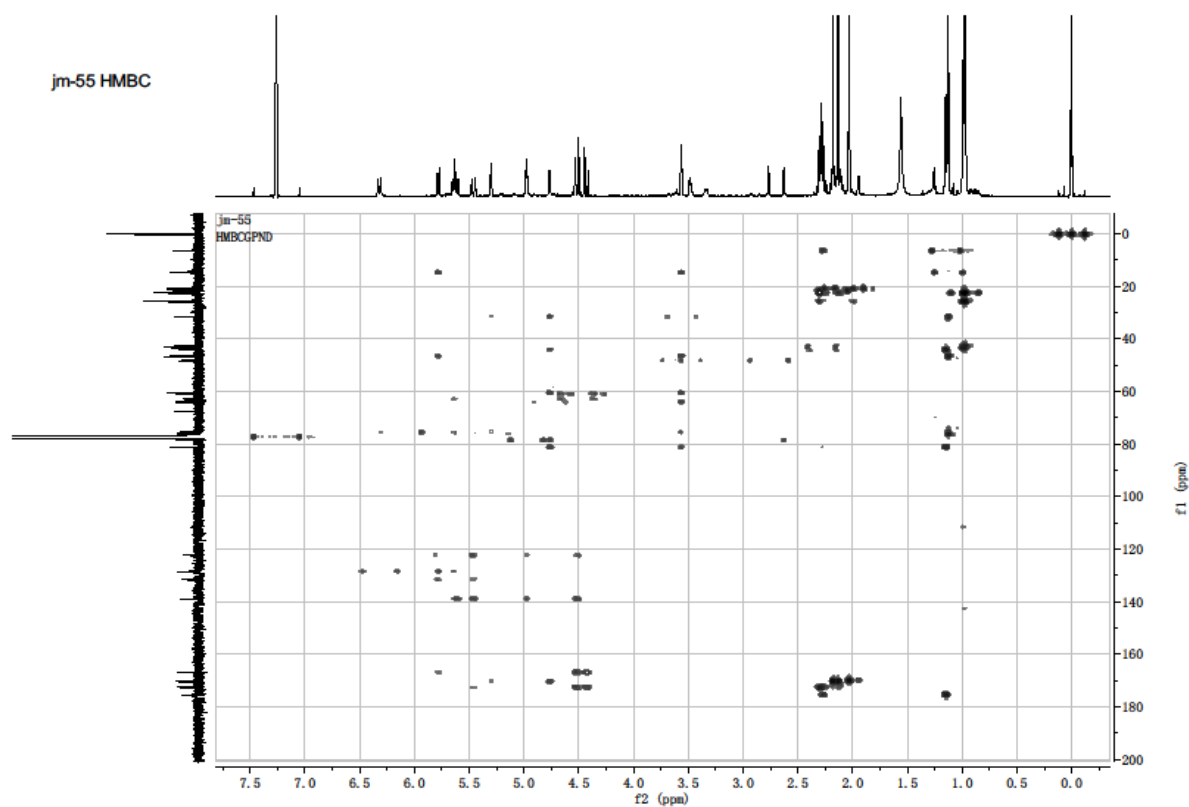Figure S72. NOESY spectrum of compound **9** in CDCl<sub>3</sub>.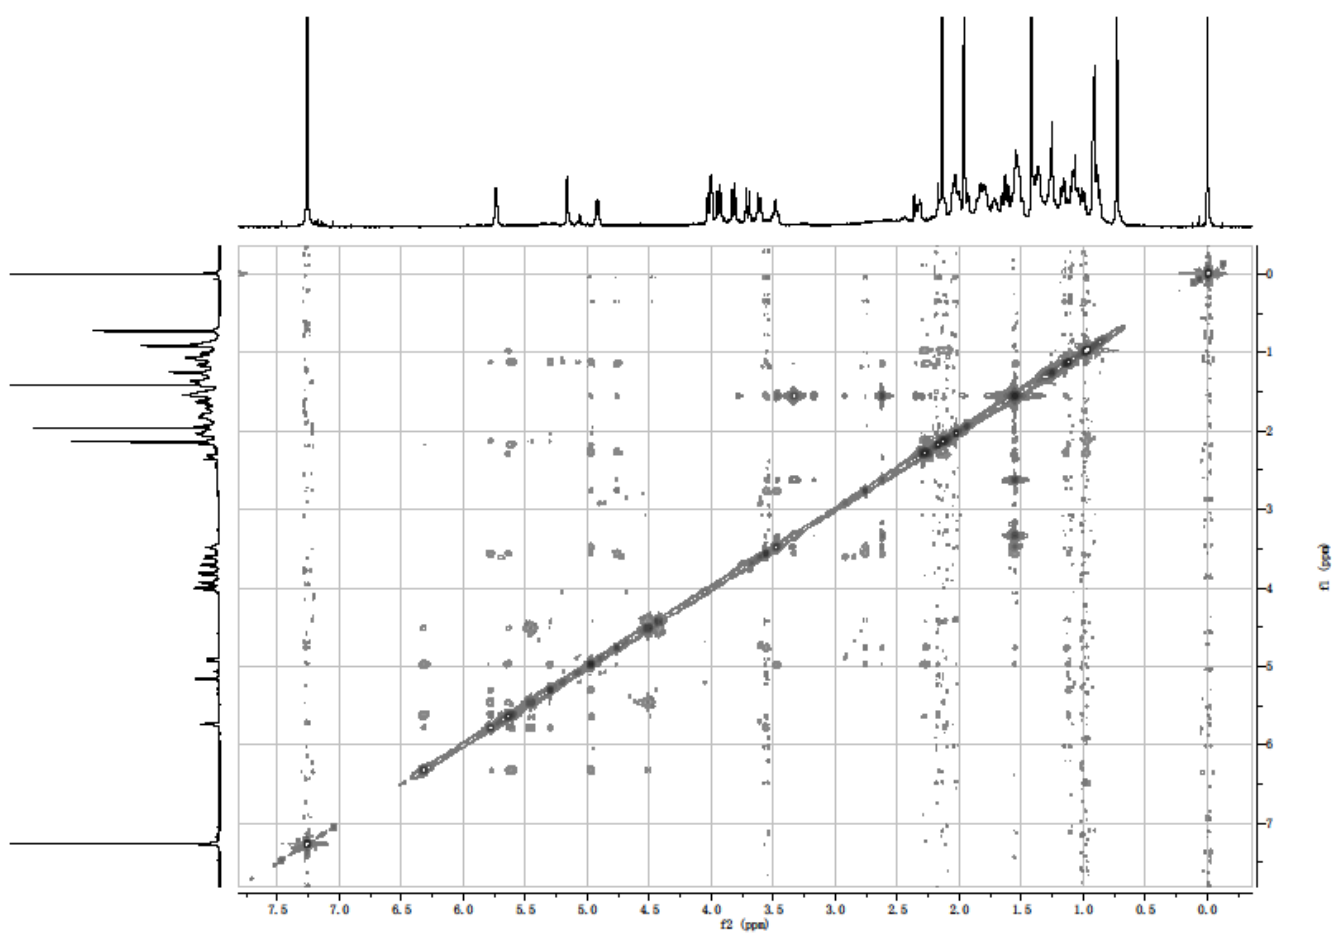



Figure S73. HR-ESIMS spectrum of the new compound 10.

**Multiple Mass Analysis: 2 mass(es) processed**

Tolerance = 10.0 PPM / DBE: min = -1.5, max = 50.0

Selected filters: None

Monoisotopic Mass, Even Electron Ions

12 formula(e) evaluated with 1 results within limits (up to 50 closest results for each mass)

Elements Used:

C: 5-38 H: 10-60 O: 3-16 Na: 1-1 Cl: 1-1

SIPI

LA-18 M.W=798

WQ10372H1 6 (0.207) AM (Cen,6, 80.00, Ar,5000.0,830.34,1.00); Sm (SG, 2x3.00); Cm (3:25)

Q-ToF micro  
YA019

09-Oct-2010,16:05:11

0.00000000

TOF MS ES+

4.75e4

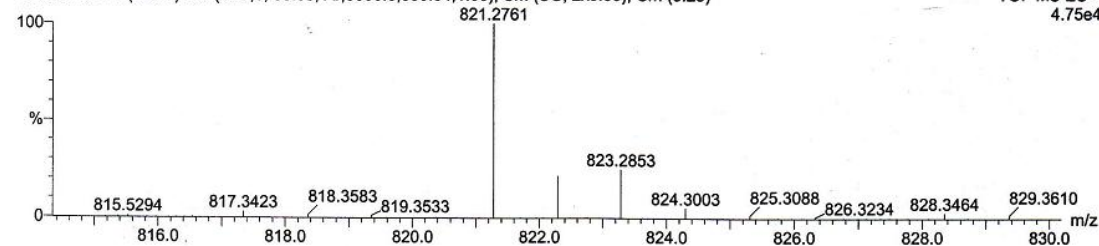

Minimum: 25.00  
Maximum: 100.00

5.0 10.0 50.0

| Mass     | RA     | Calc. Mass | mDa  | PPM  | DBE  | i-FIT  | Formula           |
|----------|--------|------------|------|------|------|--------|-------------------|
| 821.2761 | 100.00 | 821.2763   | -0.2 | -0.2 | 12.5 | 3469.0 | C38 H51 O16 Na Cl |

Figure S74. <sup>1</sup>H NMR spectrum of the new compound 10.

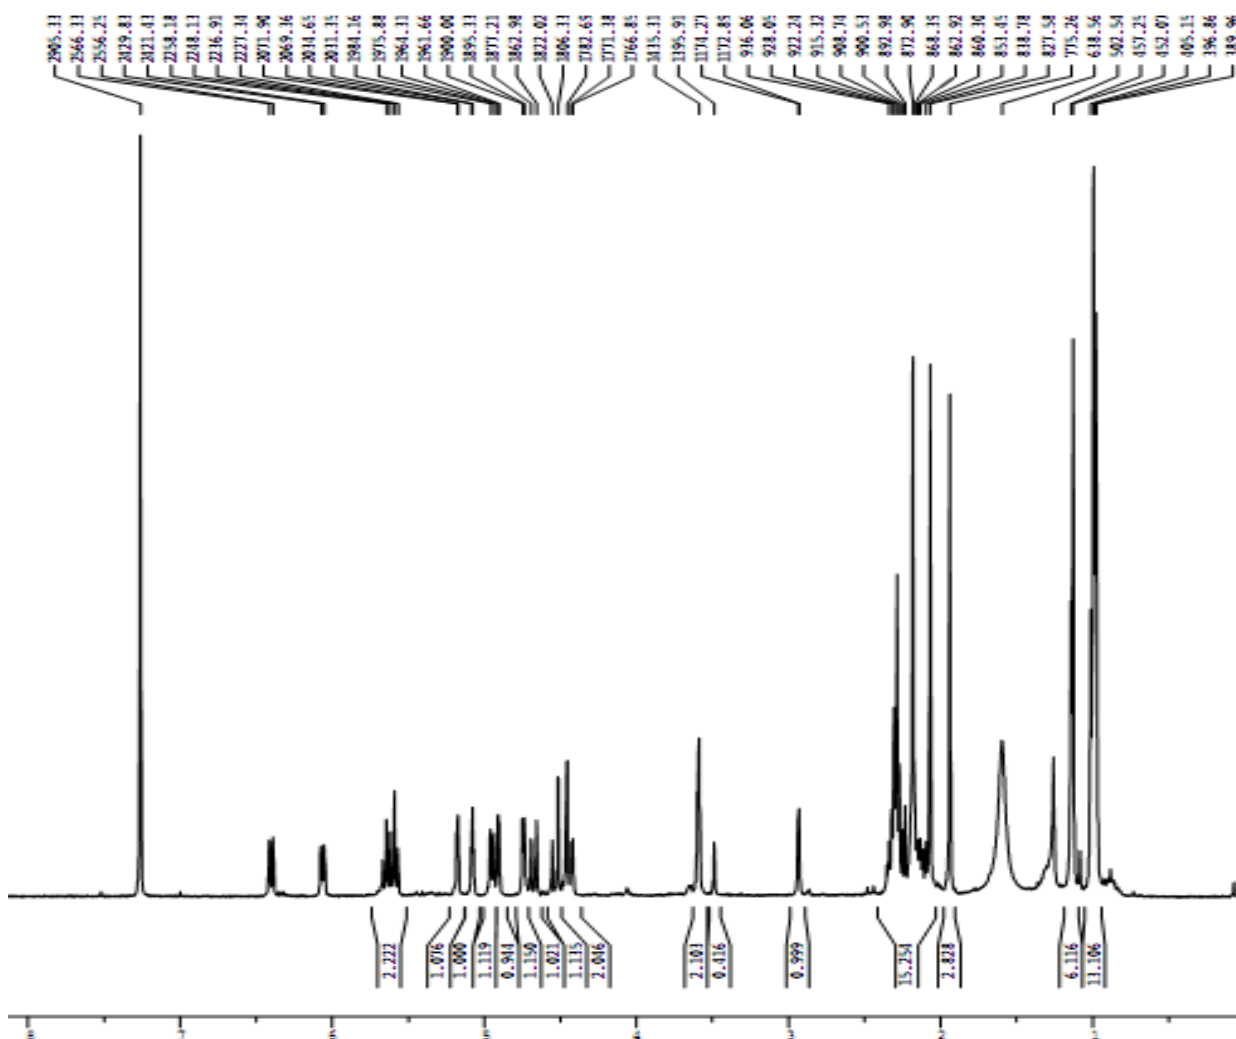

Figure S75. <sup>13</sup>C NMR spectrum of the new compound 10.

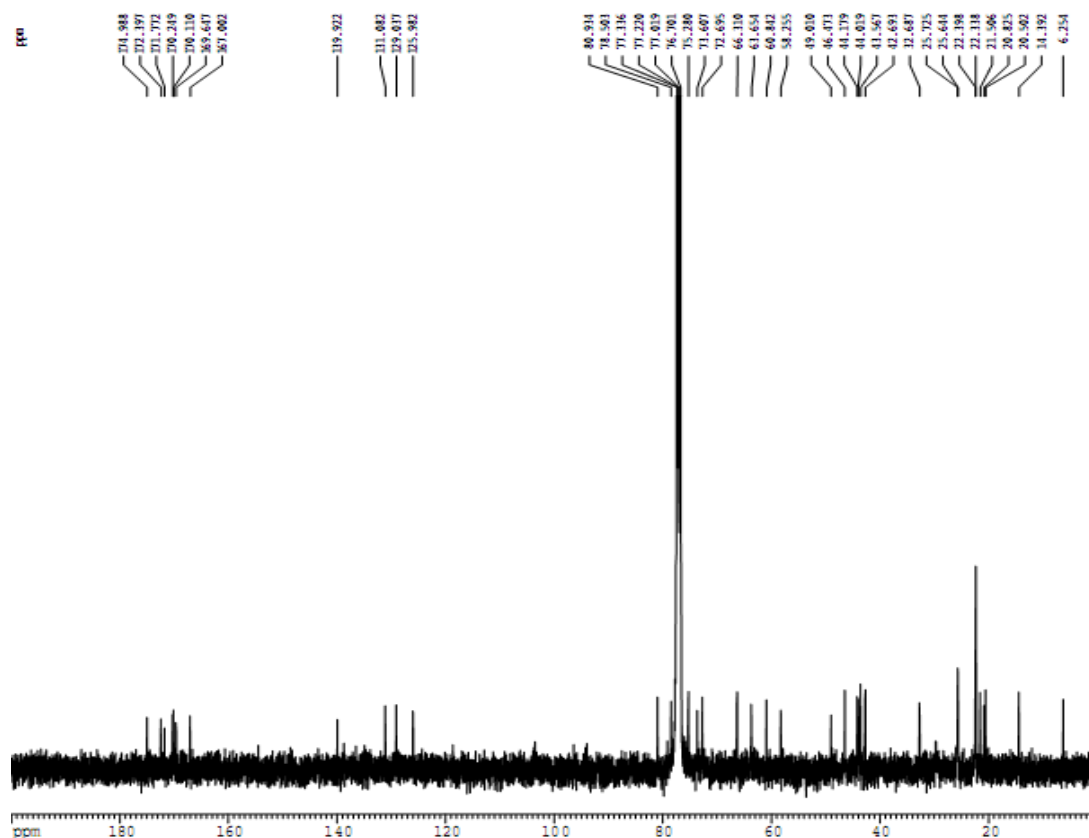

Figure S76. DEPT spectrum of the new compound 10.

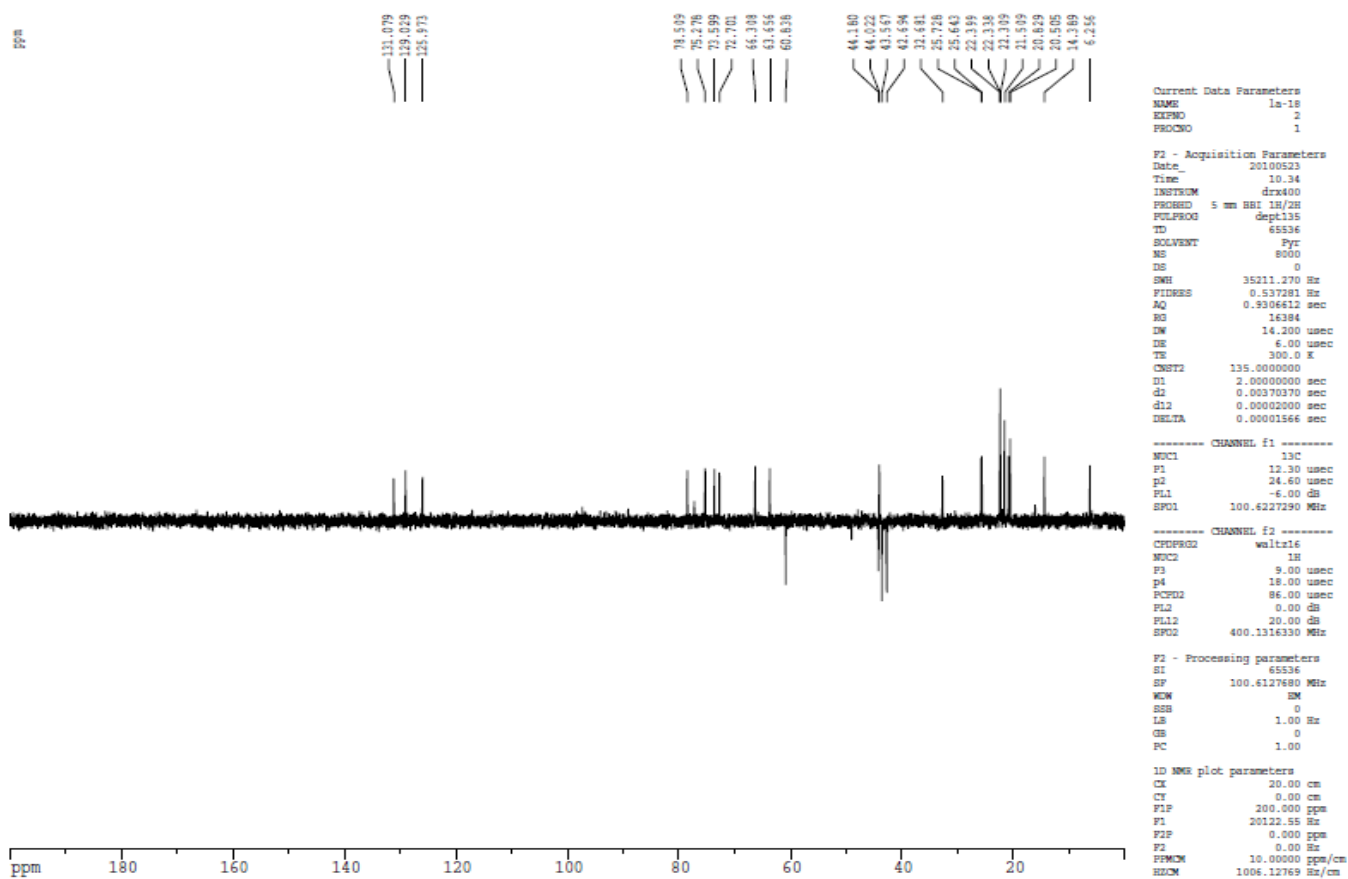

Figure S77. HSQC spectrum of the new compound 10.

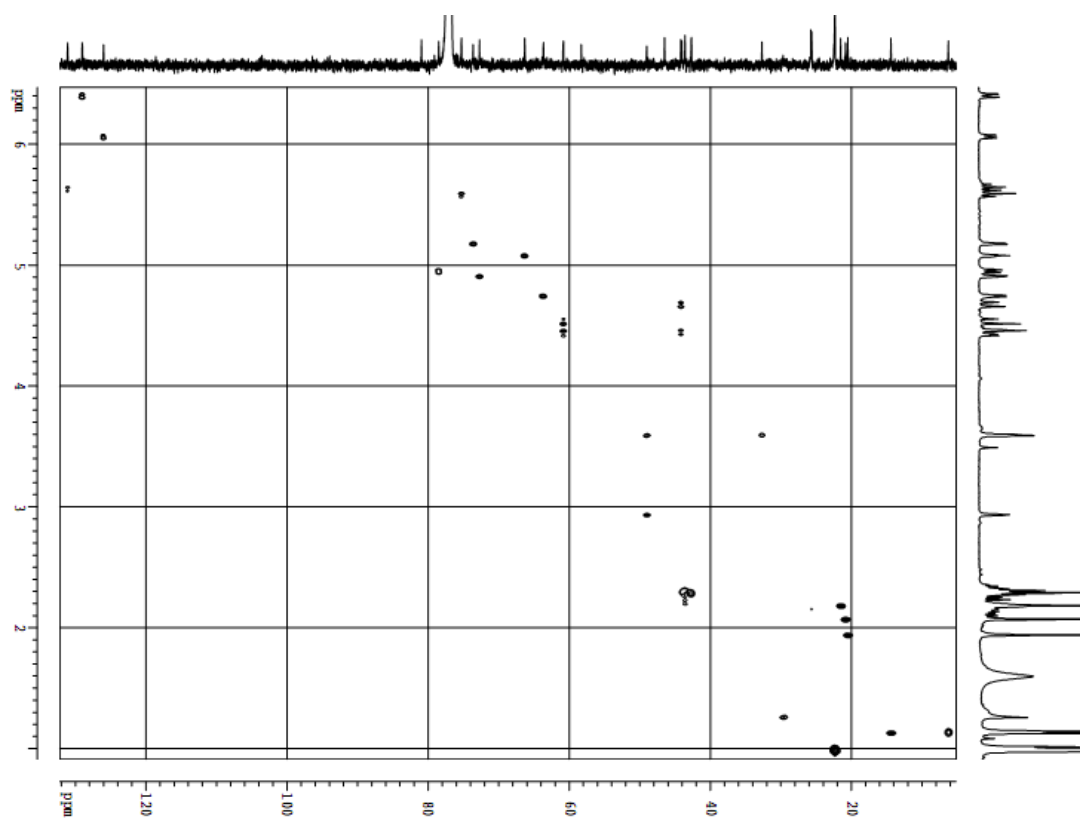Figure S78.  $^1\text{H}$ - $^1\text{H}$  COSY spectrum of the new compound 10.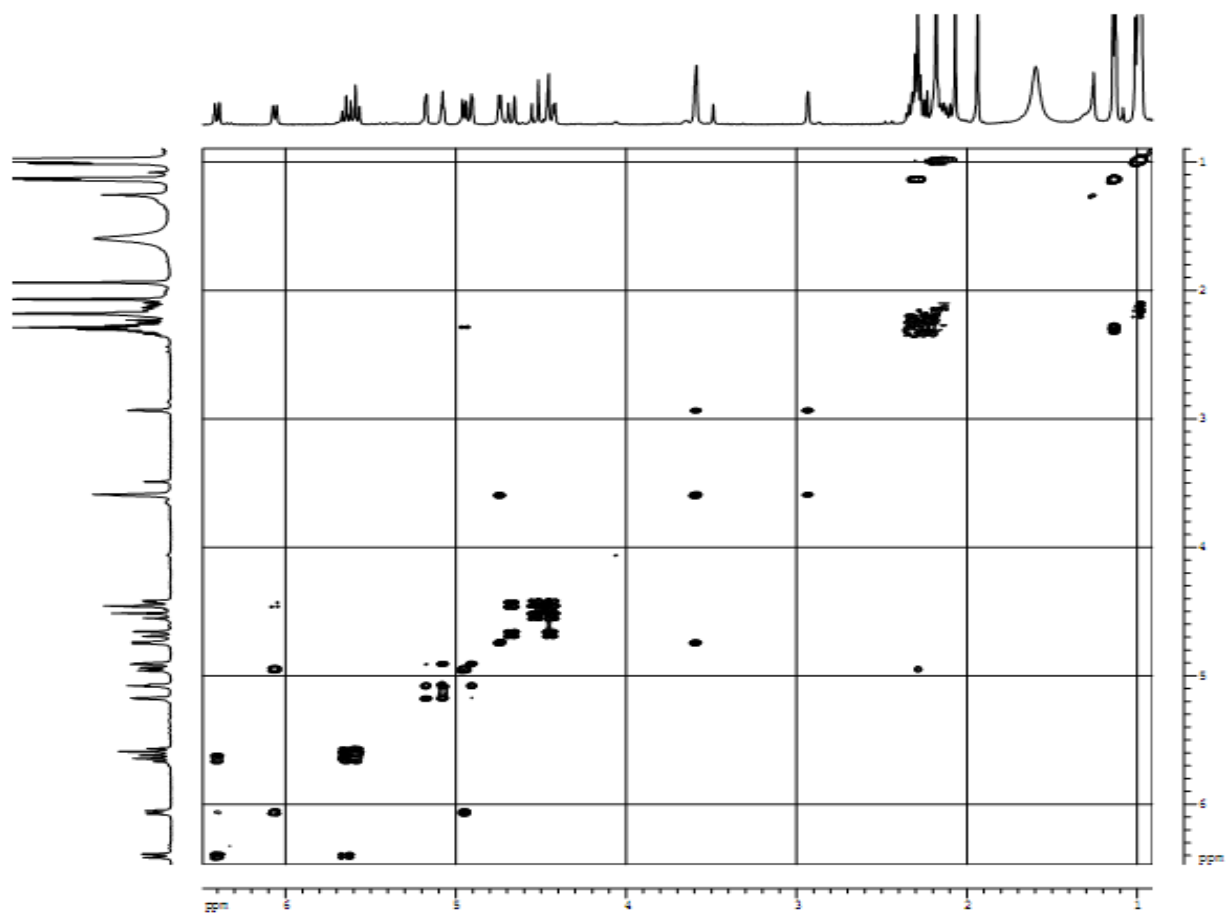

Figure S79. HMBC spectrum of the new compound 10.

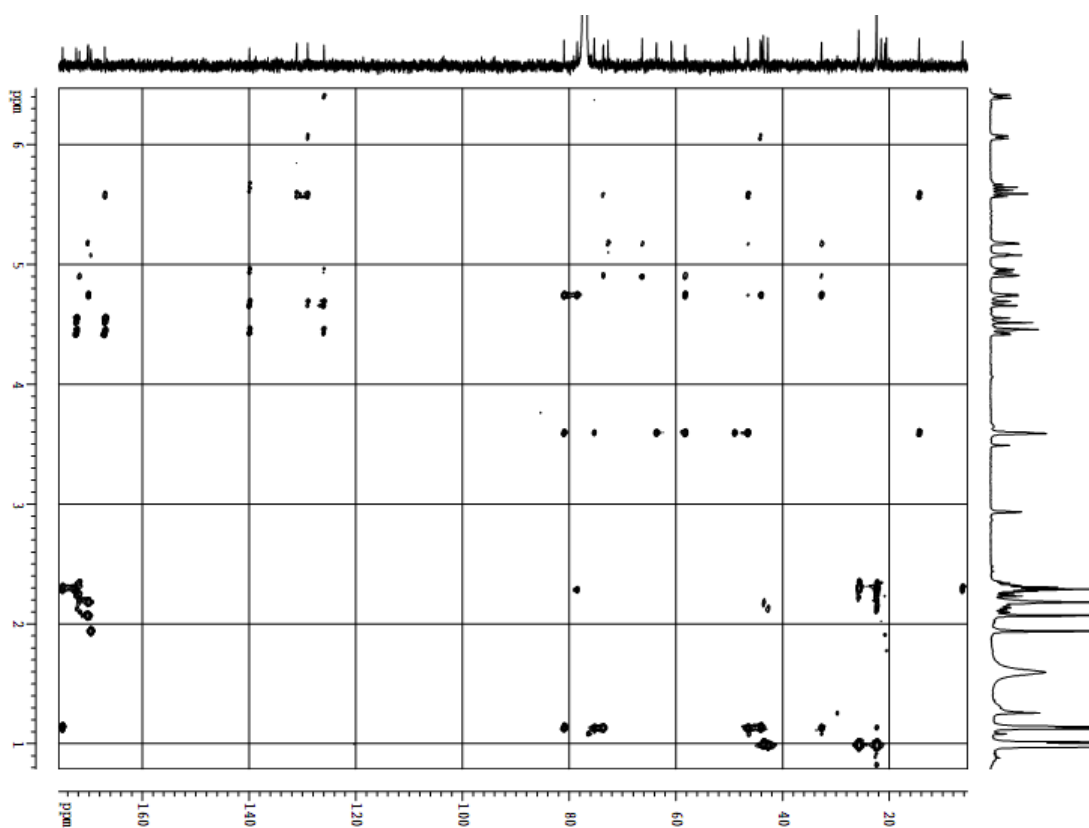

Figure S80. NOESY spectrum of the new compound 10.

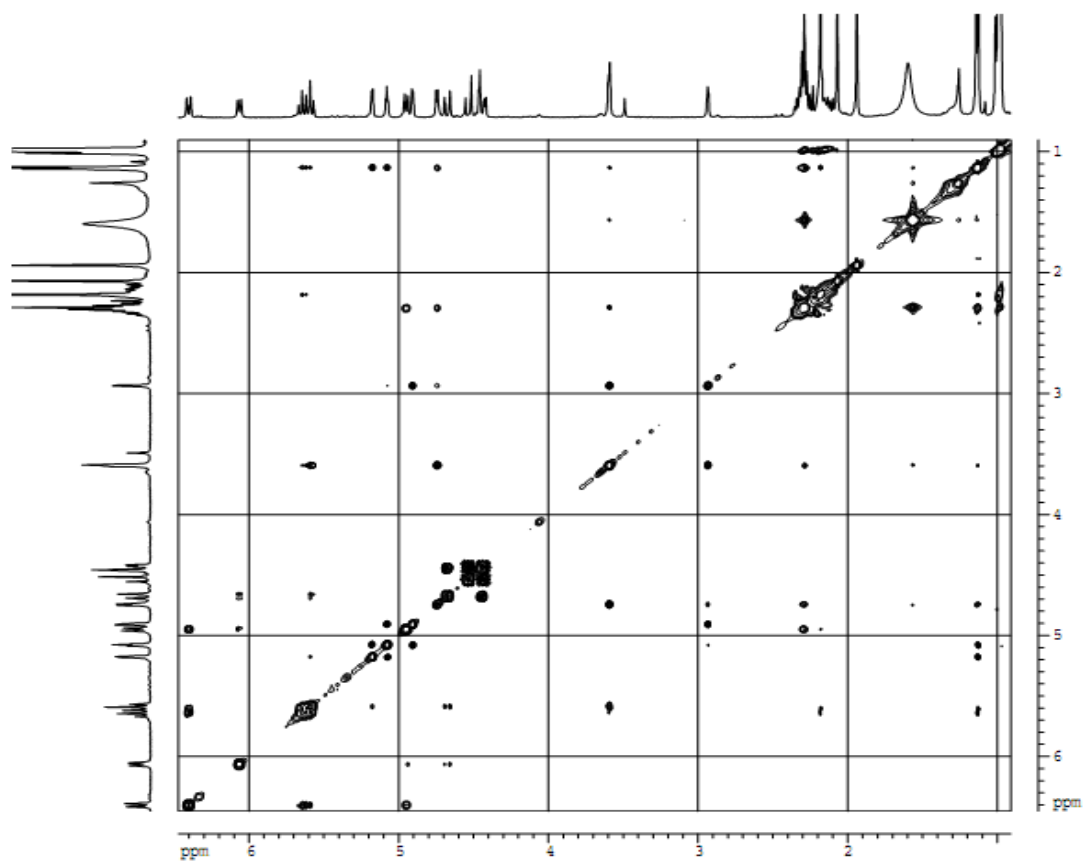

Figure S81. HRESIMS spectrum of compound 11.

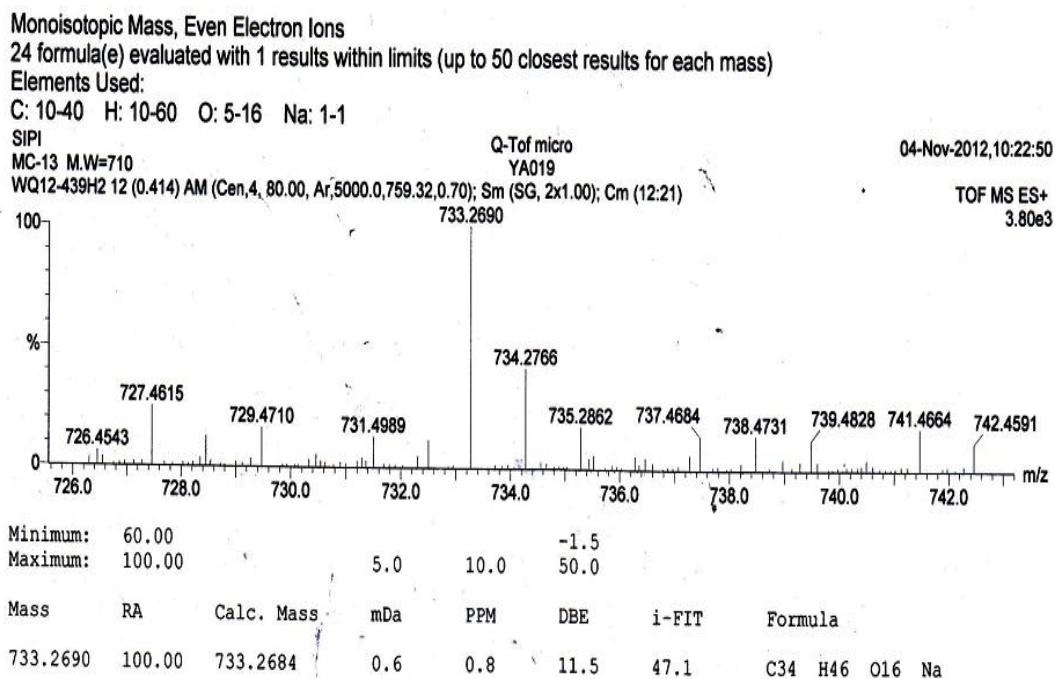

Figure S82. <sup>1</sup>H NMR spectrum of compound 11 in CDCl<sub>3</sub>.

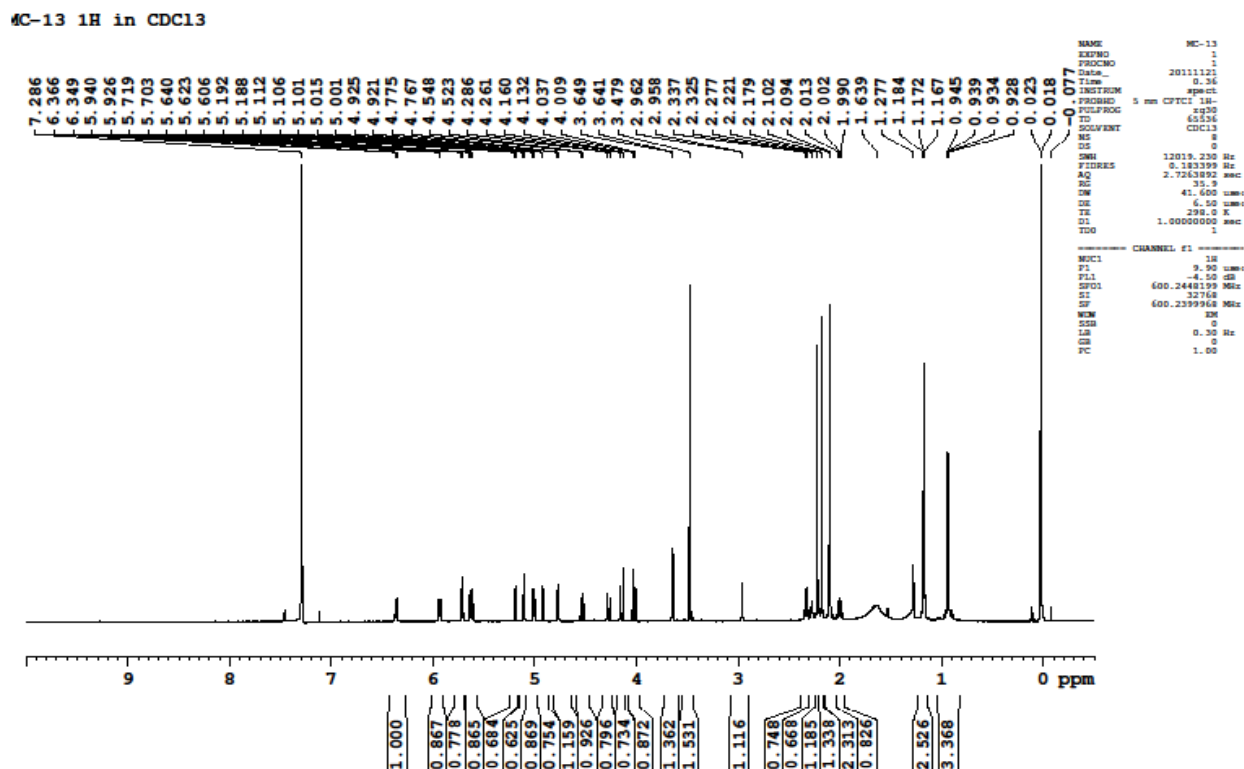

Figure S83. <sup>13</sup>C NMR spectrum of compound 11 in CDCl<sub>3</sub>.

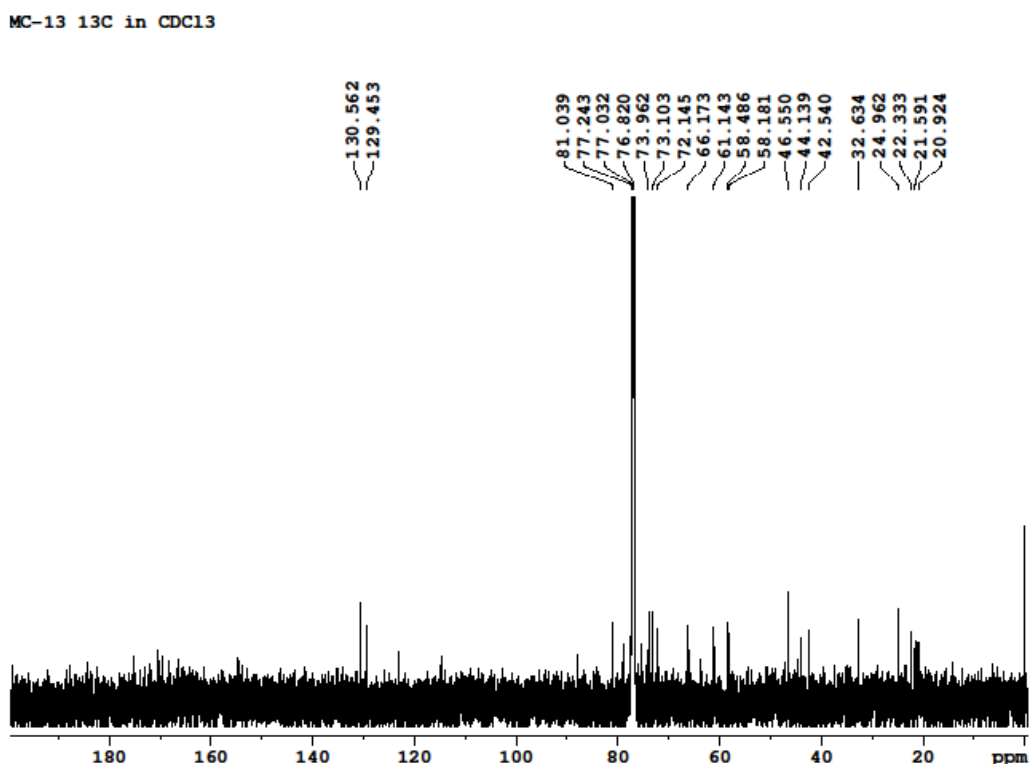

Figure S84. DEPT spectrum of compound 11 in CDCl<sub>3</sub>.

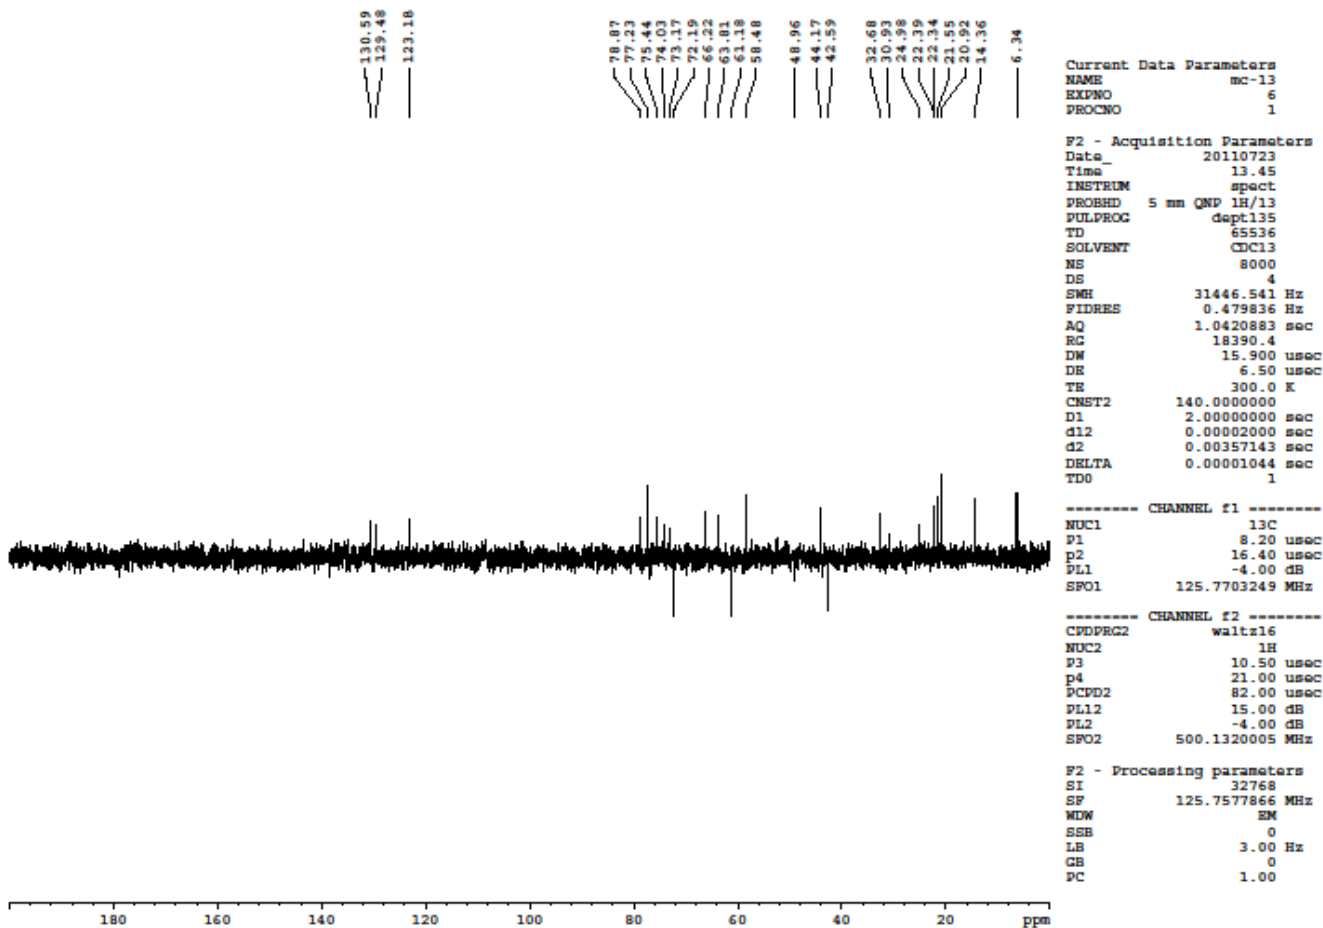

Figure S85. HSQC spectrum of compound **11** in CDCl<sub>3</sub>.

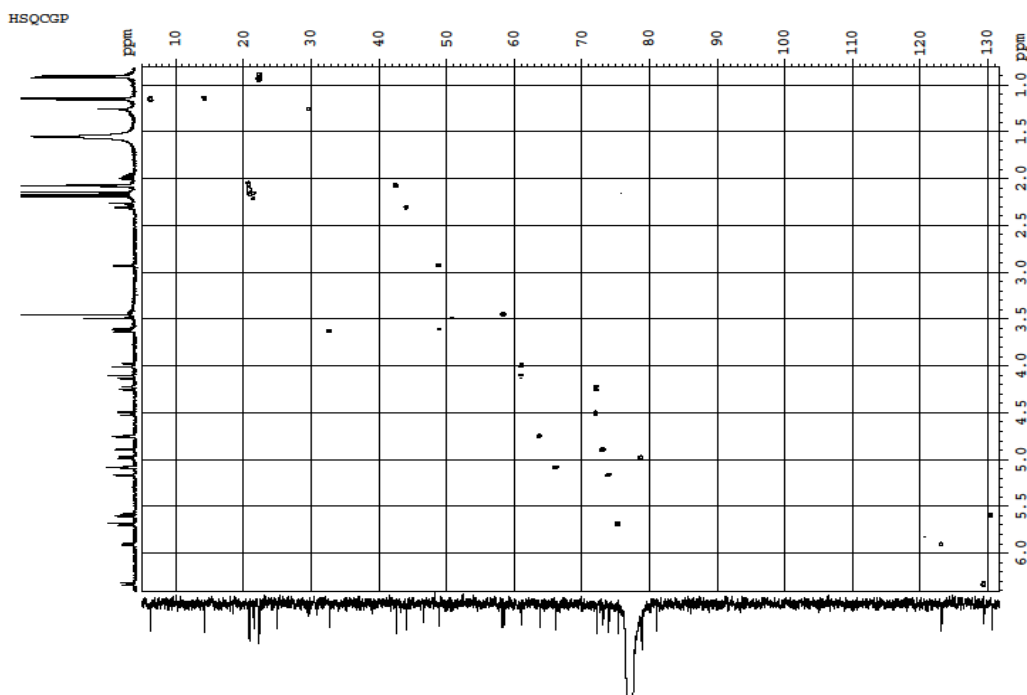

Figure S86. <sup>1</sup>H-<sup>1</sup>H COSY spectrum of compound **11** in CDCl<sub>3</sub>.

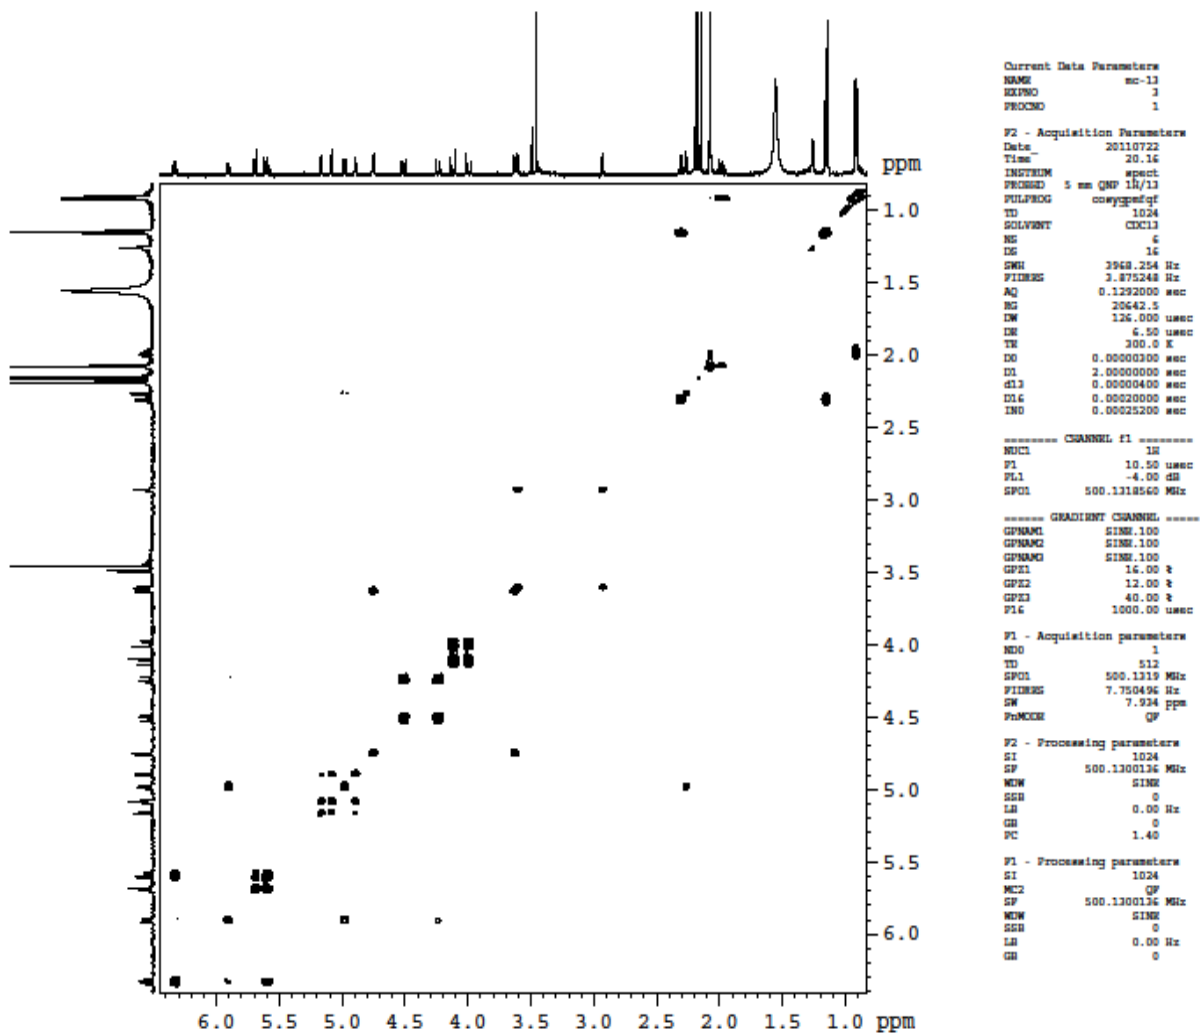

Figure S87. HMBC spectrum of compound 11 in CDCl<sub>3</sub>.

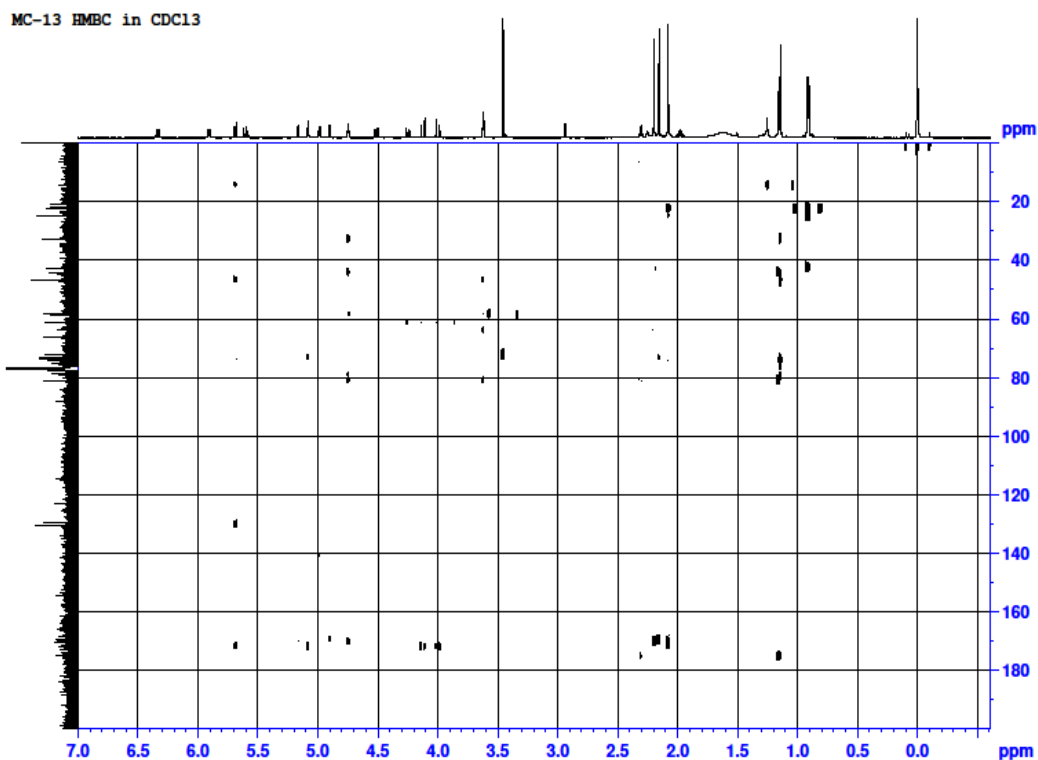

Figure S88. NOESY spectrum of compound 11 in CDCl<sub>3</sub>.

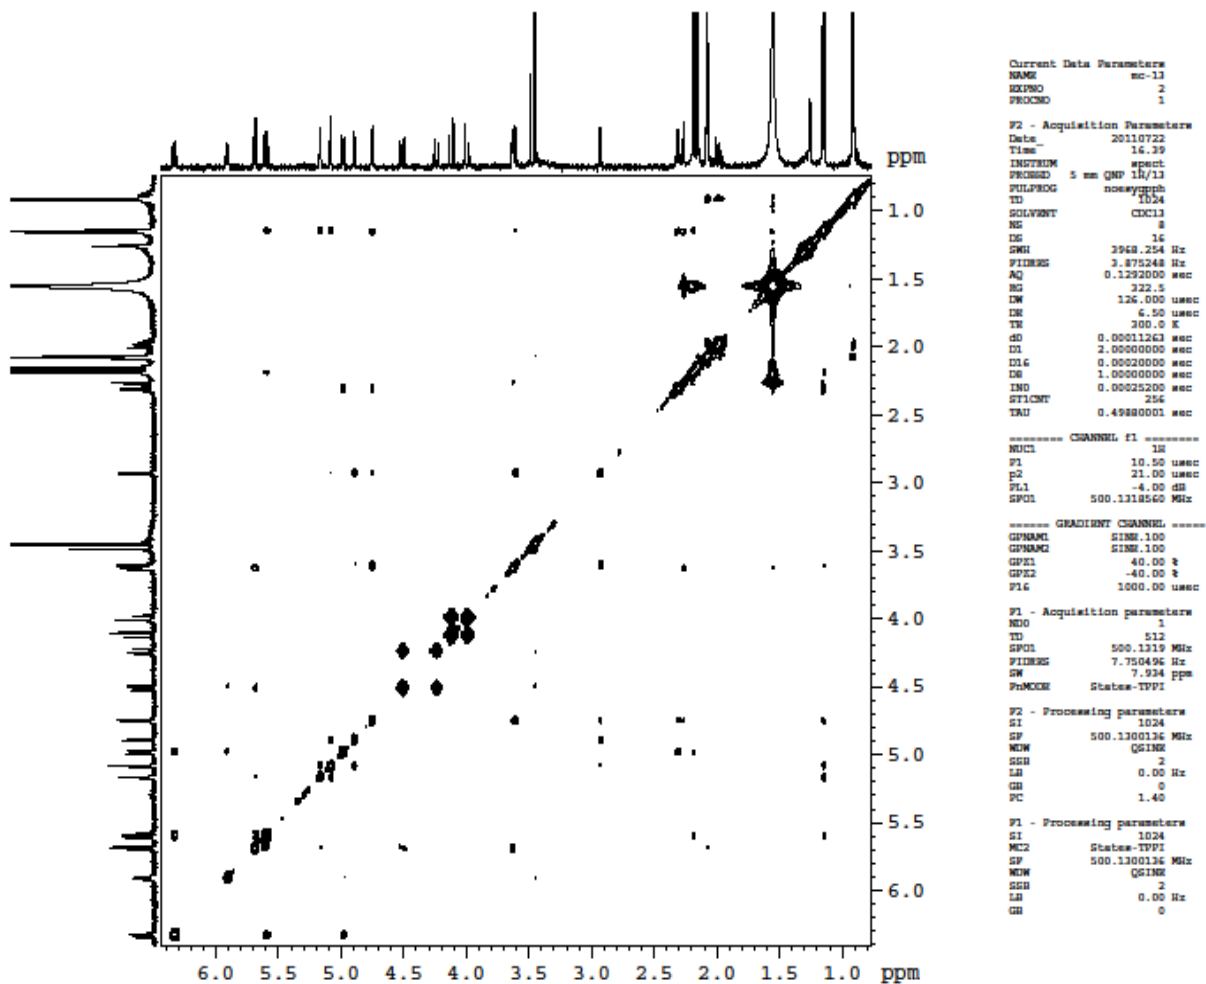



Figure S89. HR-ESIMS spectrum of the new compound 12.

Tolerance = 10.0 PPM / DBE: min = -1.5, max = 50.0  
 Selected filters: None

Monoisotopic Mass, Even Electron Ions

28 formula(e) evaluated with 1 results within limits (up to 50 closest results for each mass)

Elements Used:

C: 5-41 H: 10-60 O: 3-20 Na: 1-1

SIPI

LA-15 M.W.=794

WQ10369H1 14 (0.484) AM (Cen,6, 80.00, Ar,5000.0,859.51,1.00); Sm (SG, 2x3.00); Cm (6:18)

Q-ToF micro

YA019

09-Oct-2010,14:20:12

0.00000000

TOF MS ES+

3.77e5

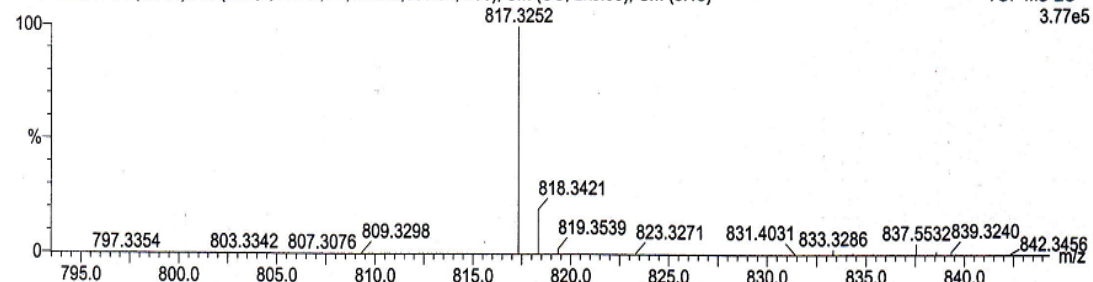

Minimum: 60.00  
 Maximum: 100.00

| Mass     | RA     | Calc. Mass | mDa  | PPM  | DBE  | i-FIT   | Formula        |
|----------|--------|------------|------|------|------|---------|----------------|
| 817.3252 | 100.00 | 817.3259   | -0.7 | -0.9 | 12.5 | 68929.6 | C39 H54 O17 Na |

Figure S90. <sup>1</sup>H MNR (400 MHz, CDCl<sub>3</sub>) spectrum of the new compound 12.

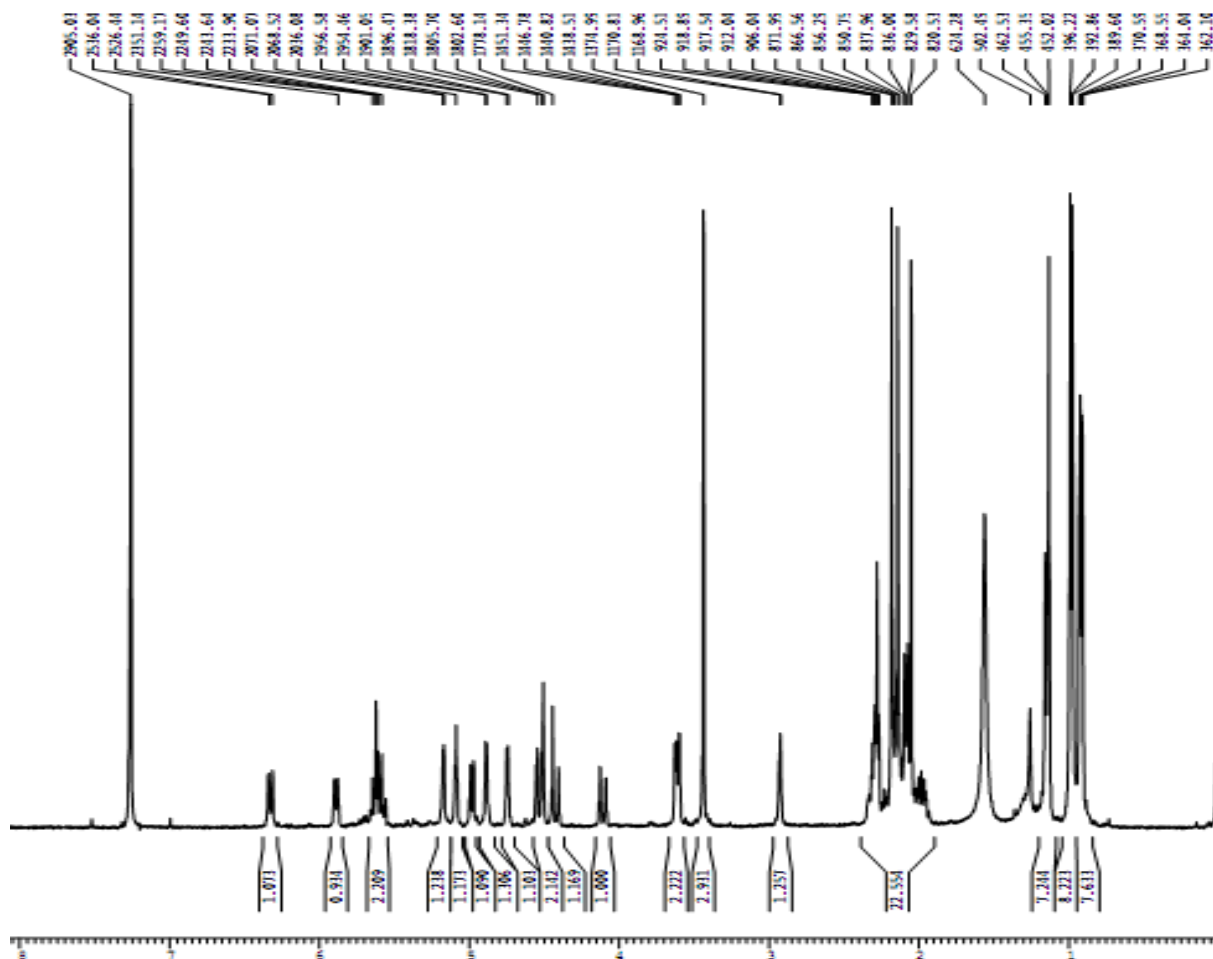

Figure S91. <sup>13</sup>C MNR (100 MHz, CDCl<sub>3</sub>) spectrum of the new compound 12.

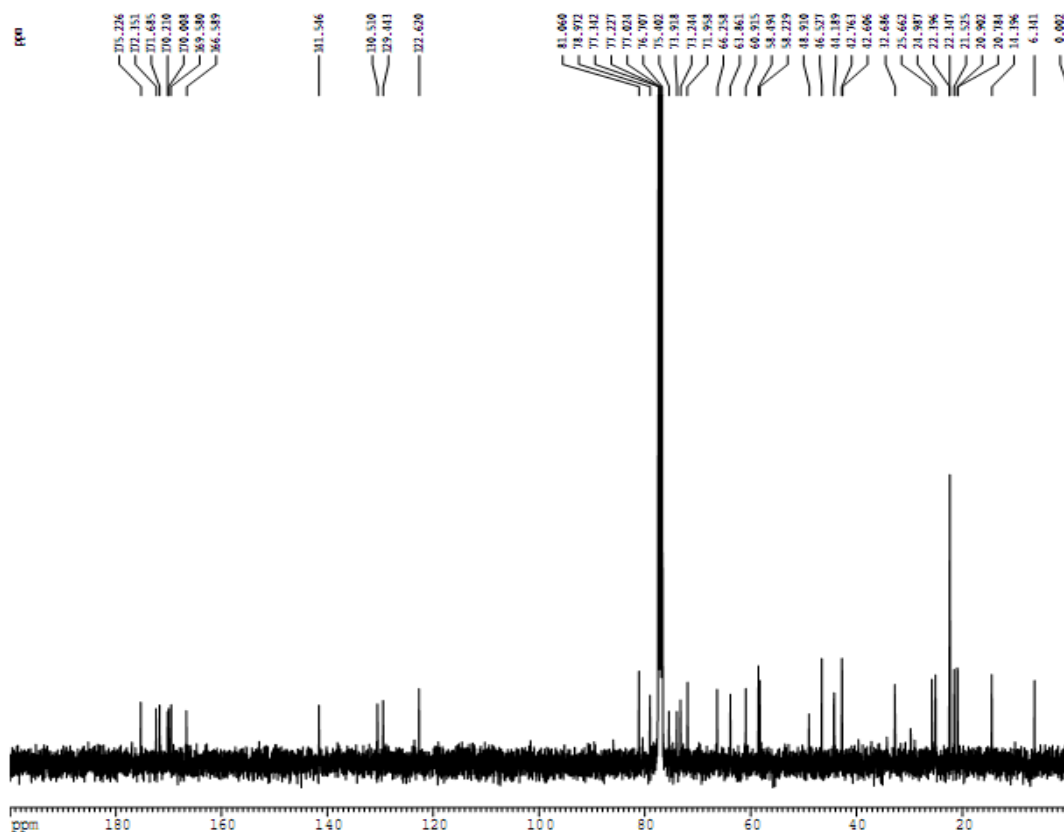

Figure S92. DEPT spectrum of the new compound 12.

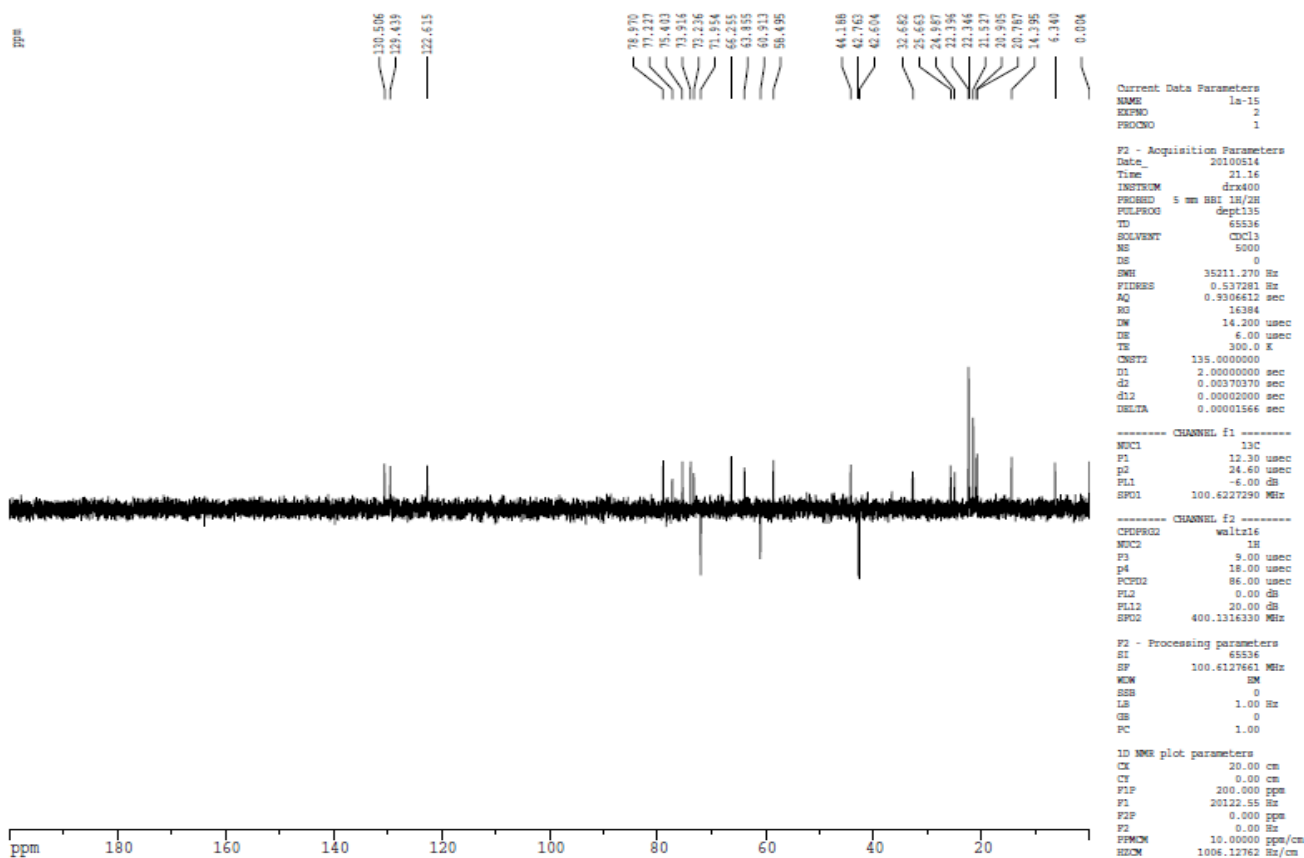

Figure S93. HSQC spectrum of the new compound 12.

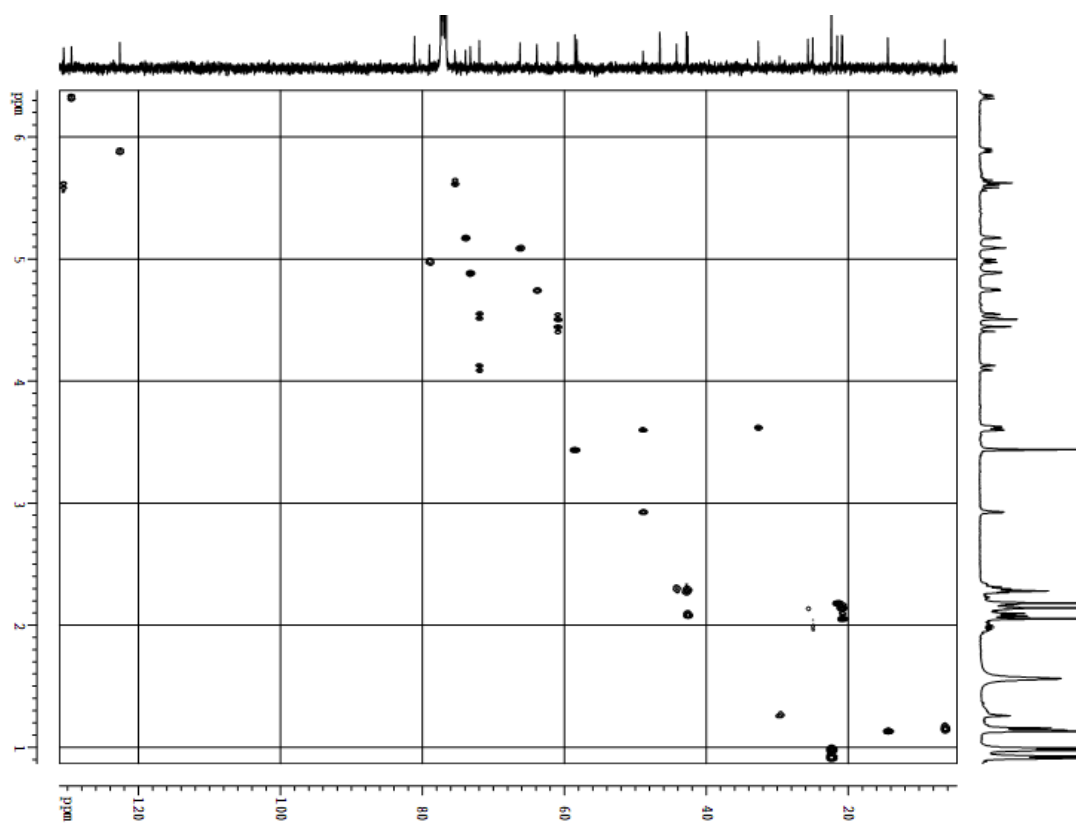Figure S94.  $^1\text{H}$ - $^1\text{H}$  COSY spectrum of the new compound 12.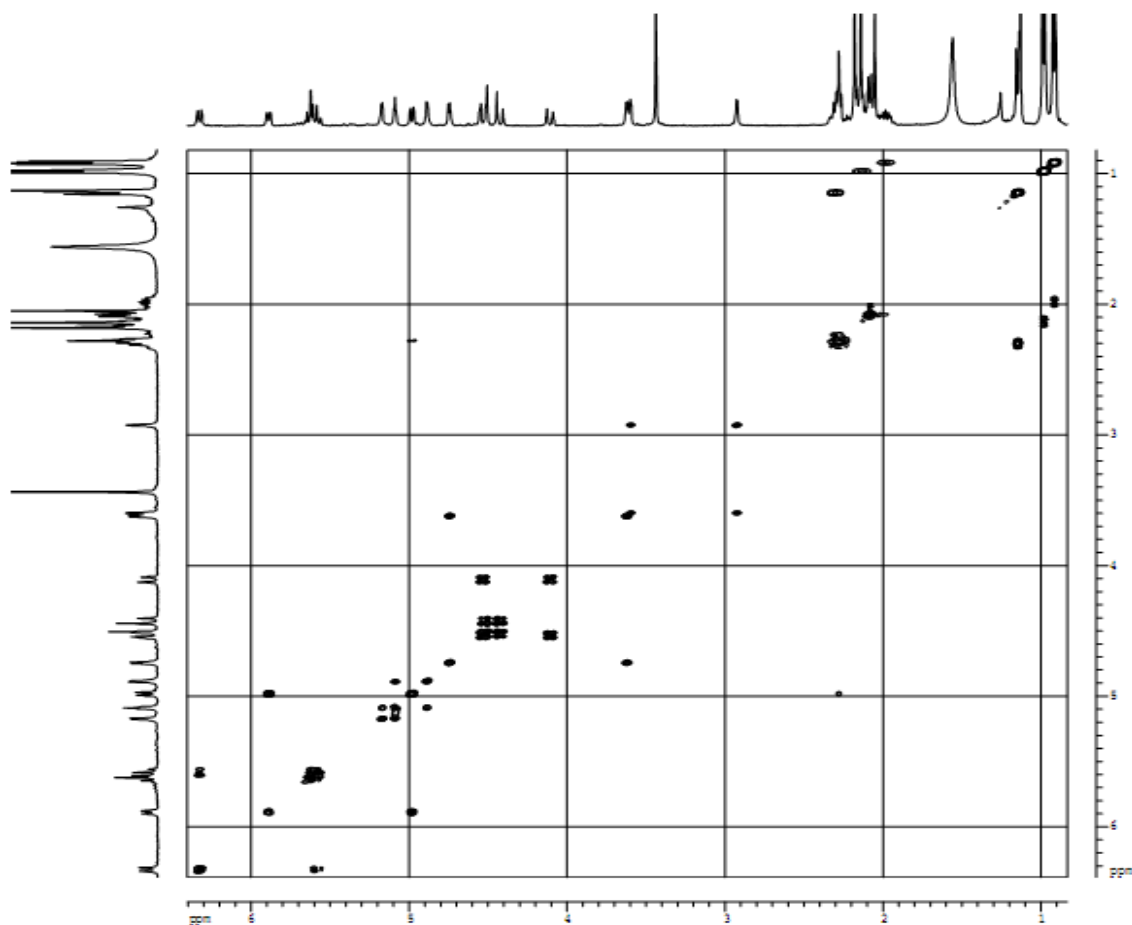

Figure S95. HMBC spectrum of the new compound 12.

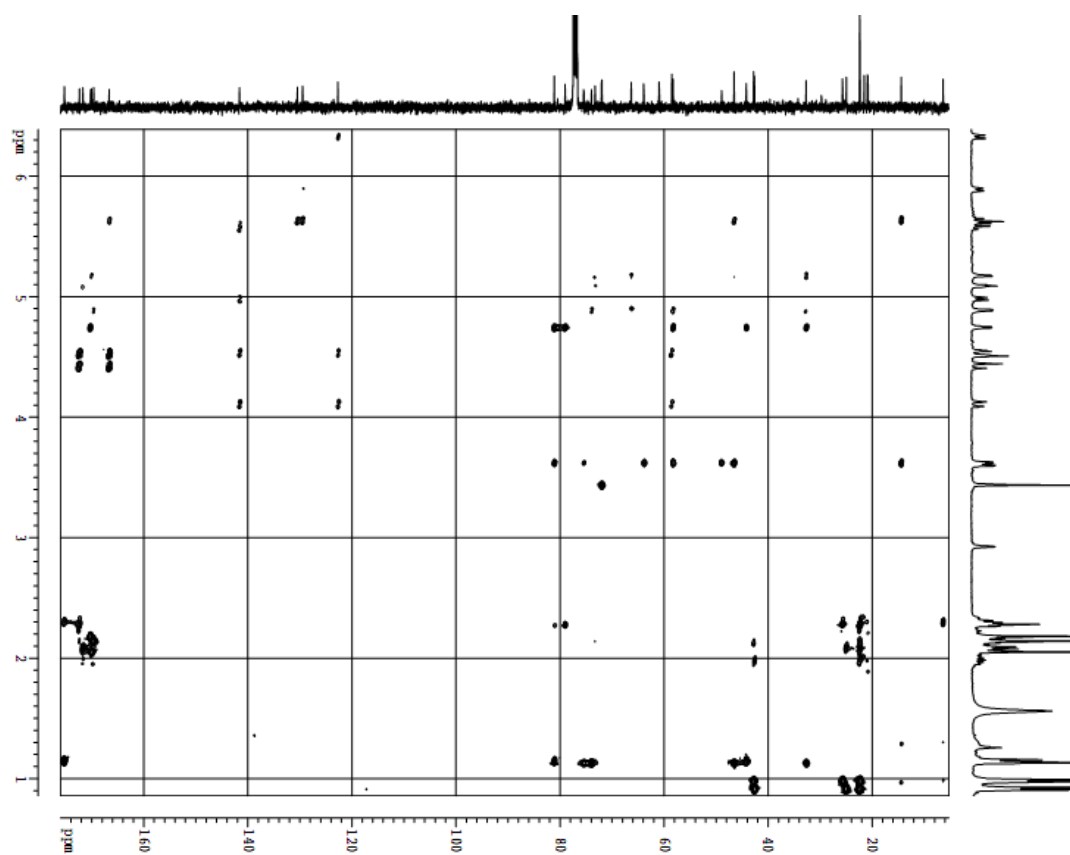

Figure S96. NOESY spectrum of the new compound 12.

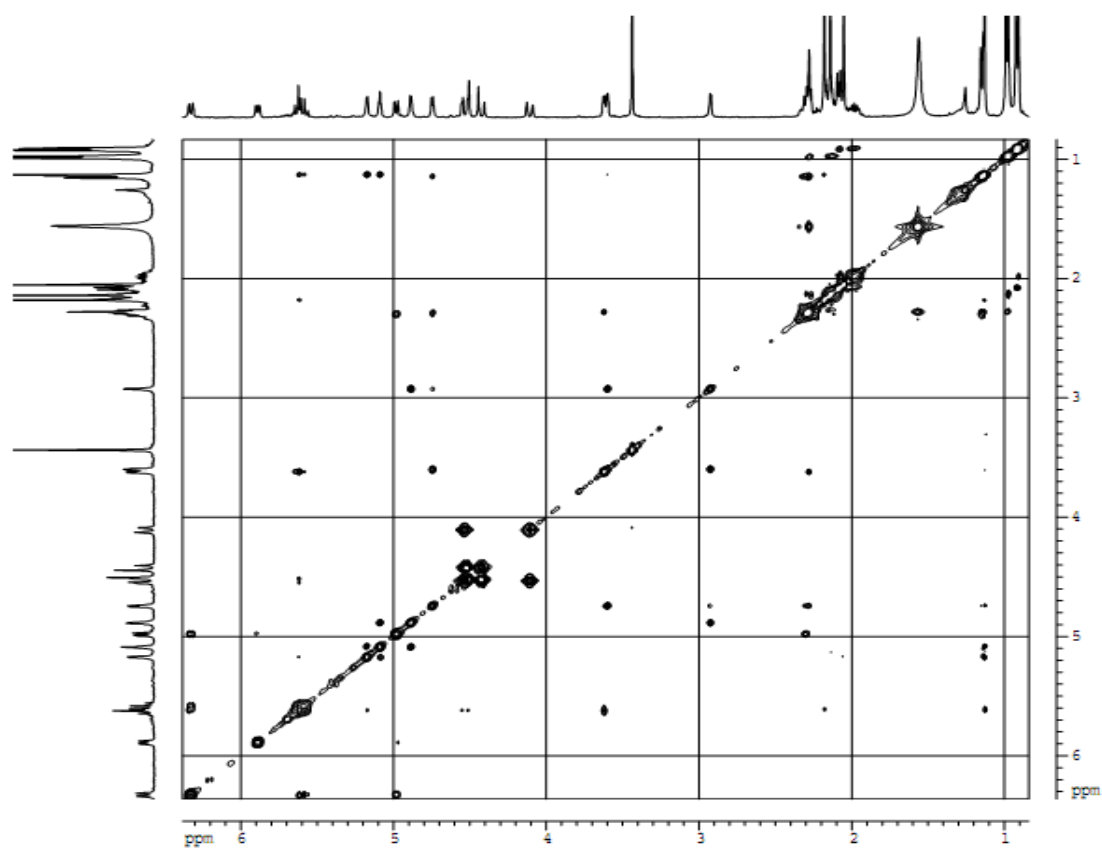

Figure S97. HRESI spectrum of compound 13.

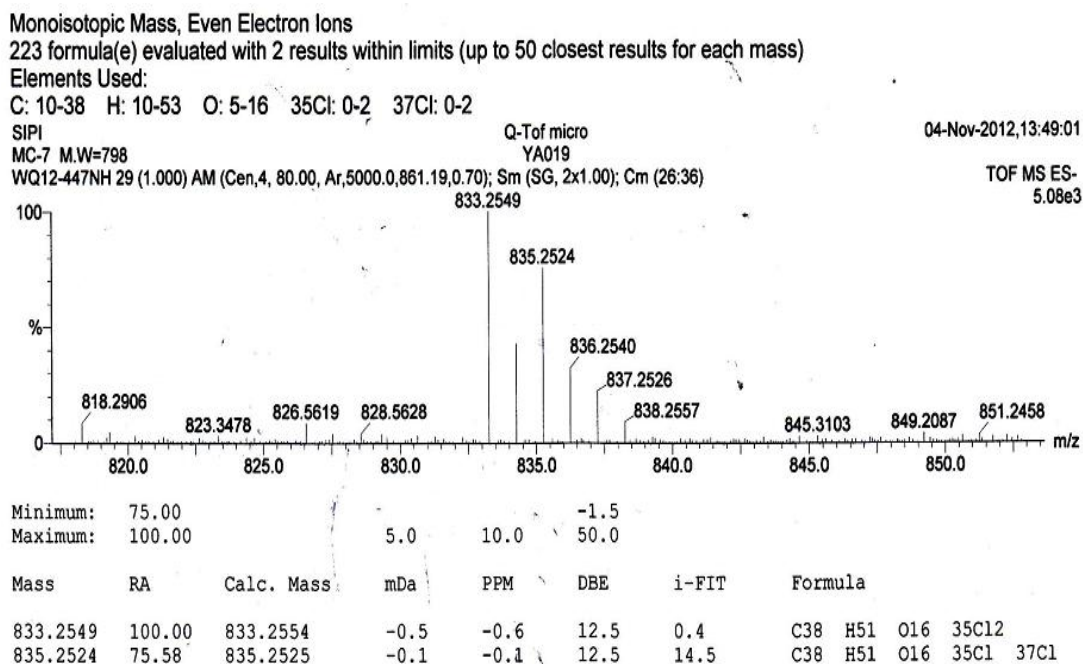

Figure S98. <sup>1</sup>H NMR spectrum of compound 13 in CDCl<sub>3</sub>.

MC-7 1H in CDCl3

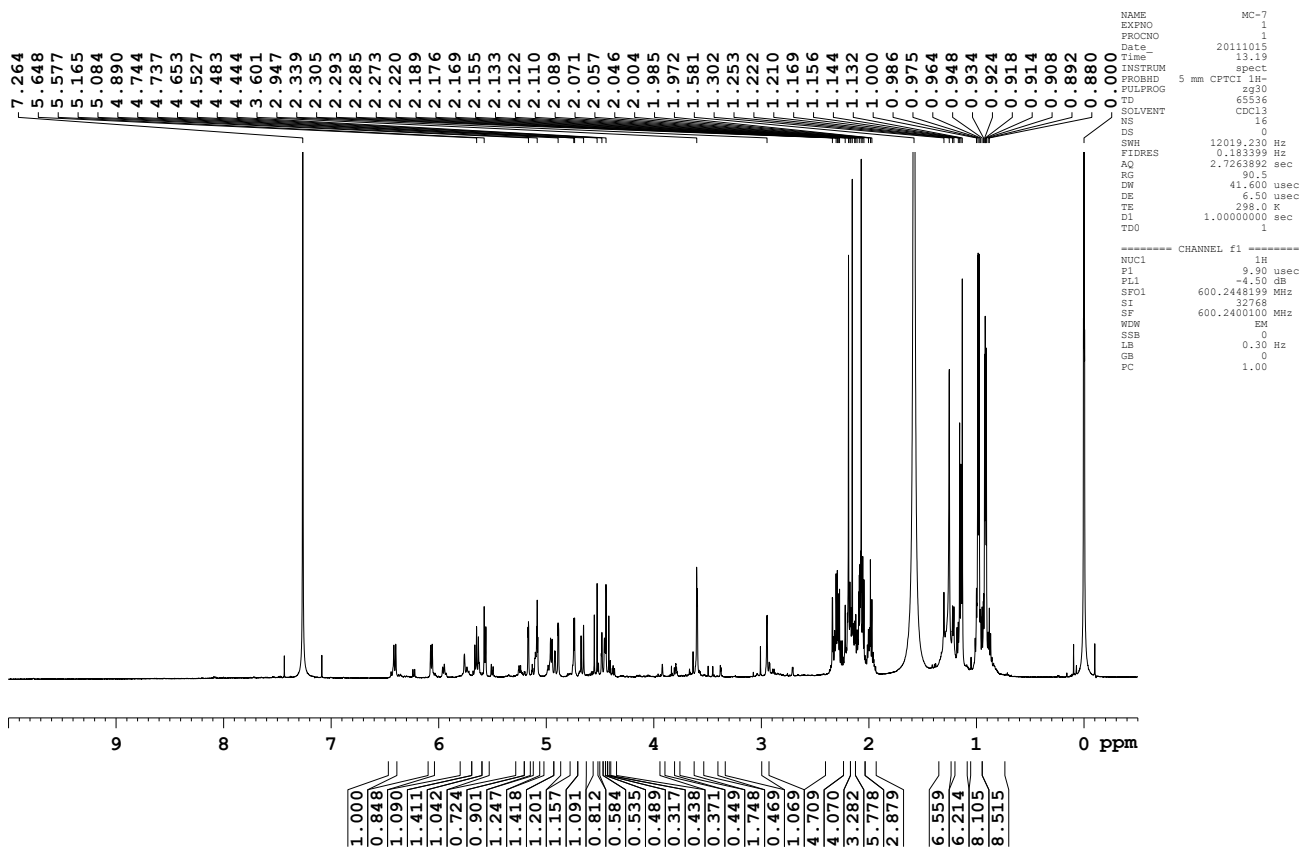

Figure S99. <sup>13</sup>C NMR spectrum of compound 13 in CDCl<sub>3</sub>.

MC-7 13C in CDCl3

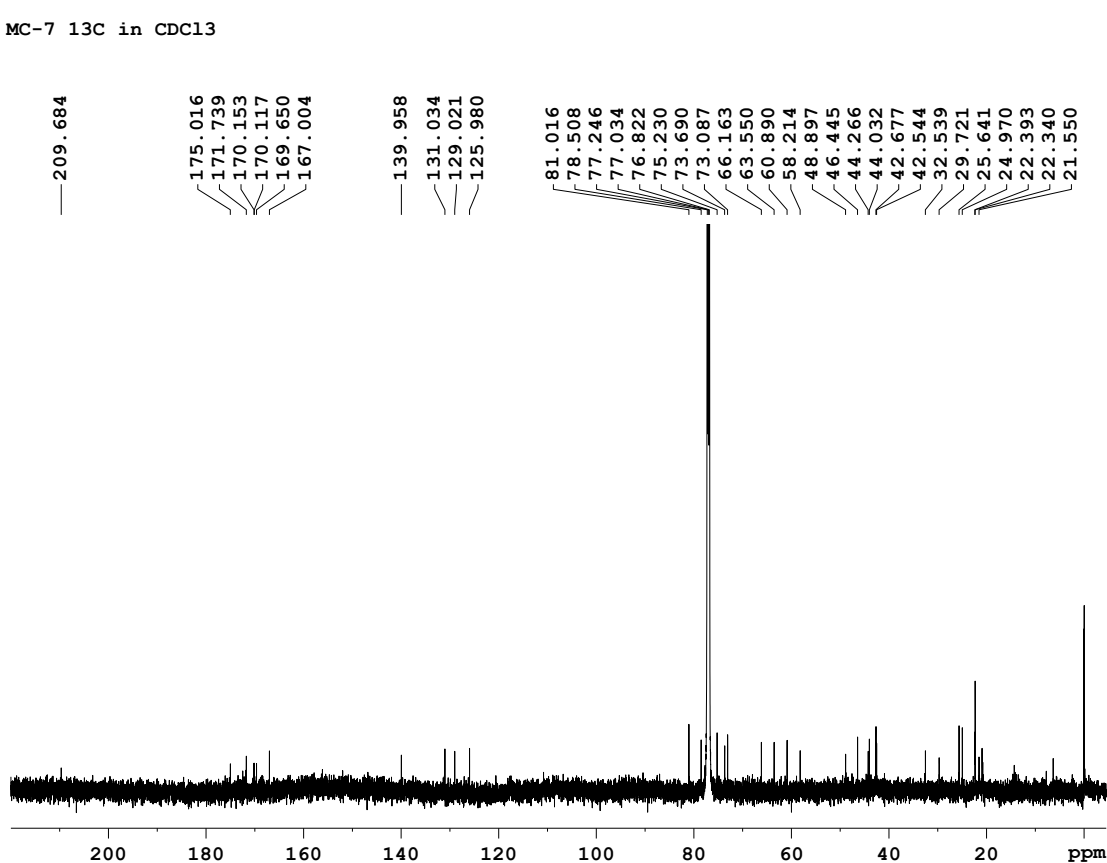

```

NAME          MC-7
EXPNO         2
PROCNO        1
Date_         20111015
Time_         9.39
INSTRUM       spect
PROBHD        5 mm CPTCI 1H-
PULPROG       zgpg30de
TD            65536
SOLVENT       CDCl3
NS            4344
DS            4
SWH           37593.984
FIDRES        0.573639
AQ            0.8716921
RG            29193
EW            13.300
DE            6.50
TE            298.0
D1            2.00000000
D11           0.03000000
TDO           1
    
```

Figure S100. DEPT spectrum of compound 13 in CDCl<sub>3</sub>.

MC-7 dept135 in CDCl3

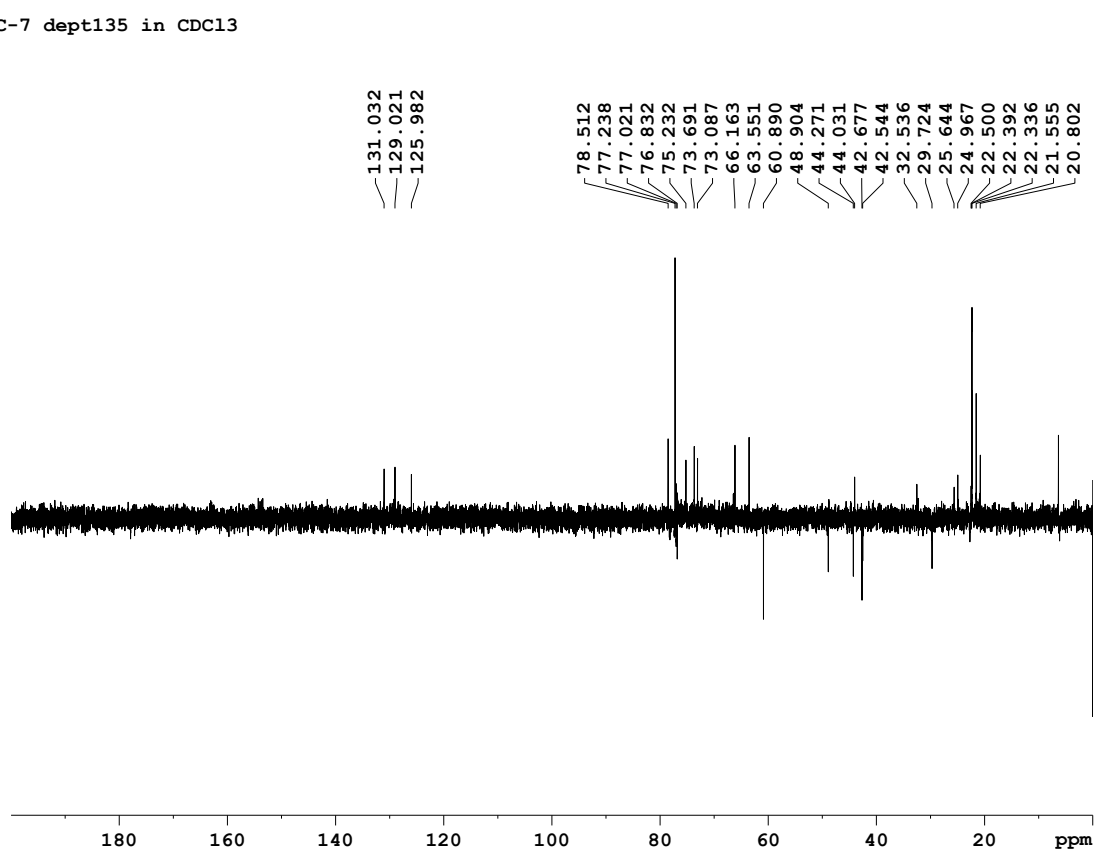

```

NAME          MC-7
EXPNO         4
PROCNO        1
Date_         20111020
Time_         13.53
INSTRUM       spect
PROBHD        5 mm CPTCI 1H-
PULPROG       dept135
TD            65536
SOLVENT       CDCl3
NS            1990
DS            4
SWH           35971.223
FIDRES        0.548877
AQ            0.9110143
RG            46311
EW            13.900
DE            6.50
TE            298.0
CNST2        145.0000000
D1            2.00000000
D2            0.00344828
D12           0.00002000
    
```

**Figure S101.** HSQC spectrum of compound **13** in CDCl<sub>3</sub>.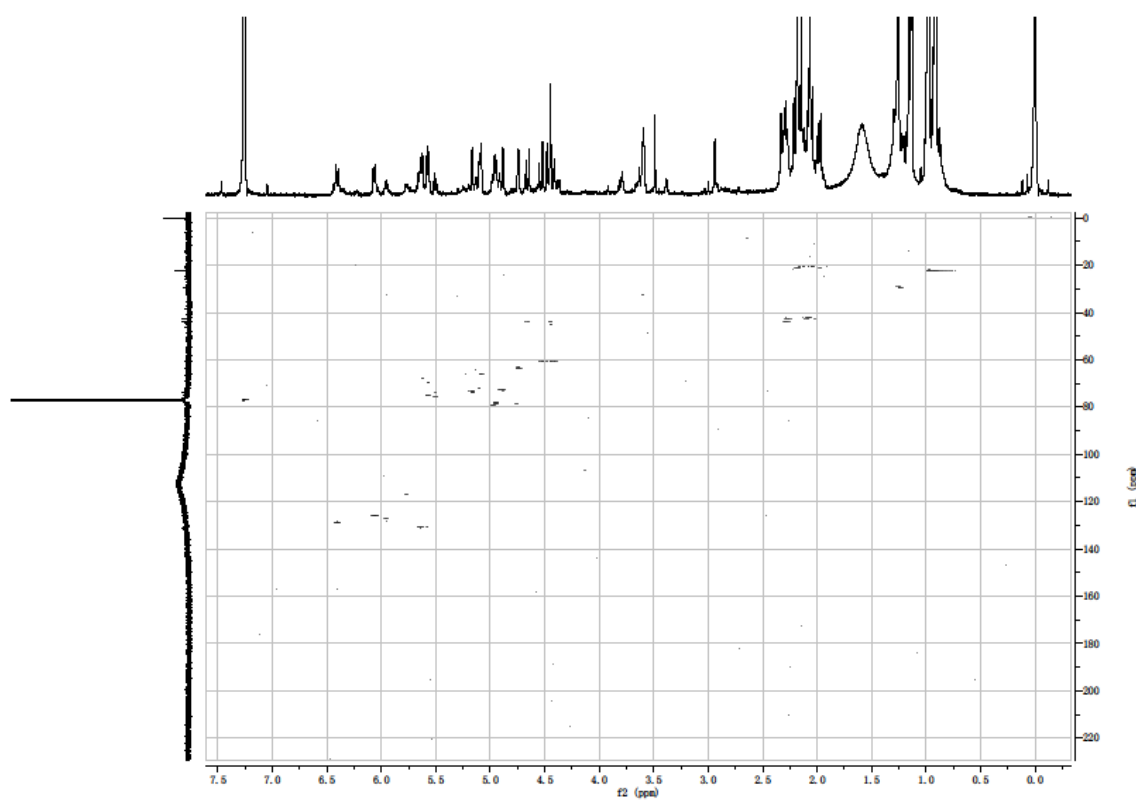**Figure S102.** <sup>1</sup>H-<sup>1</sup>H COSY spectrum of compound **13** in CDCl<sub>3</sub>.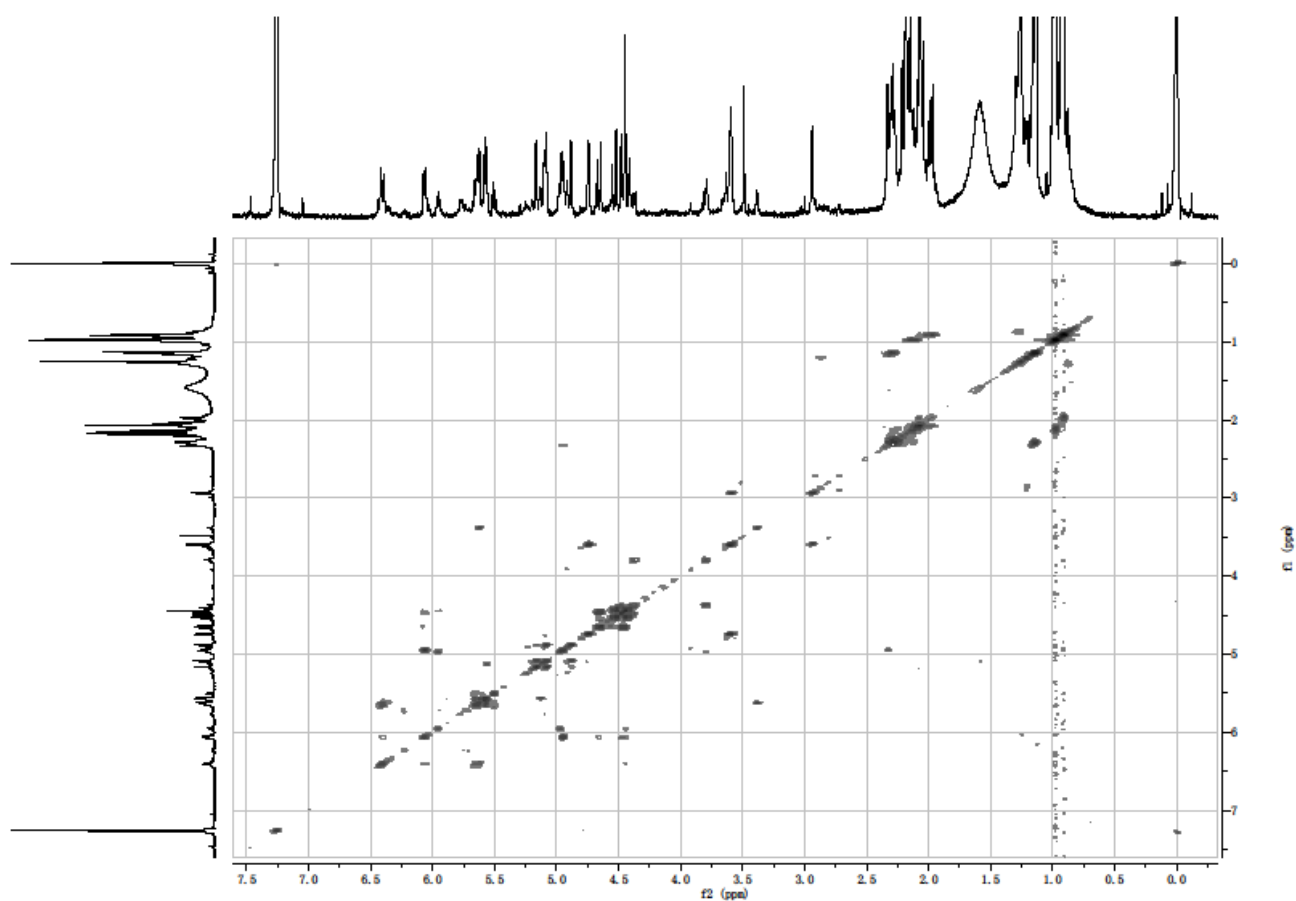

**Figure S103.** HMBC spectrum of compound **13** in CDCl<sub>3</sub>.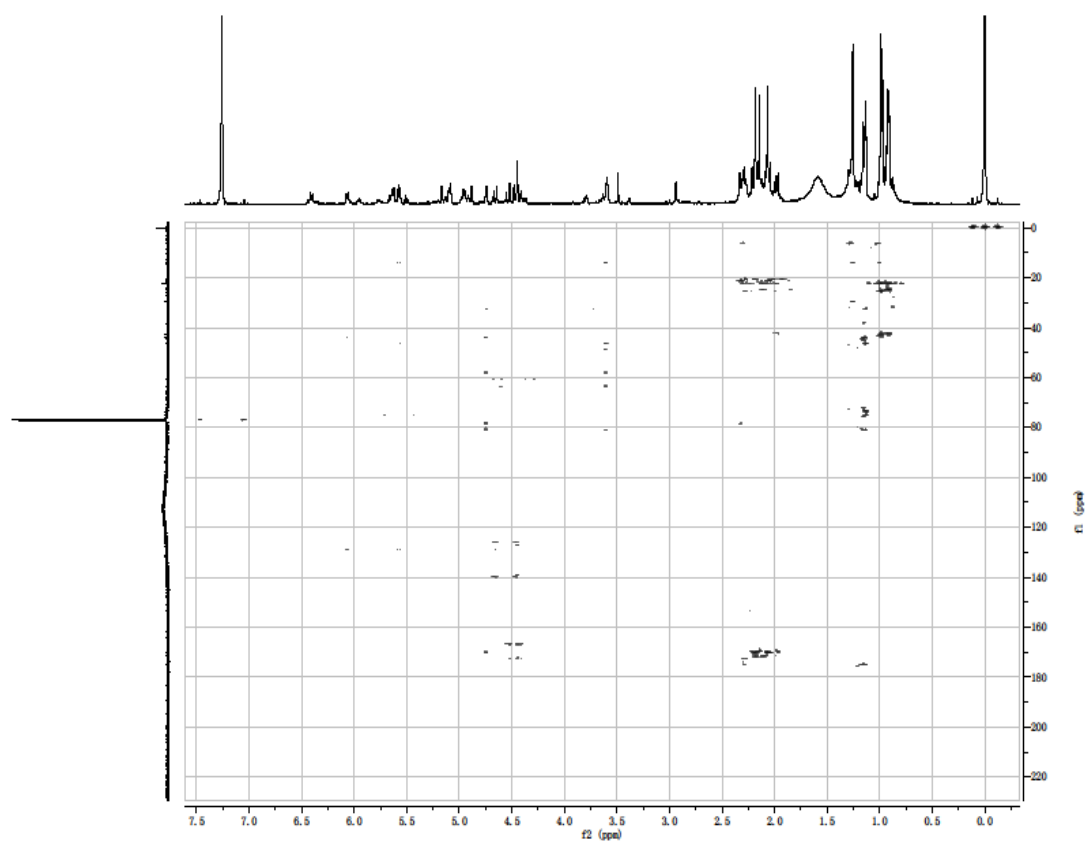**Figure S104.** NOESY spectrum of compound **13** in CDCl<sub>3</sub>.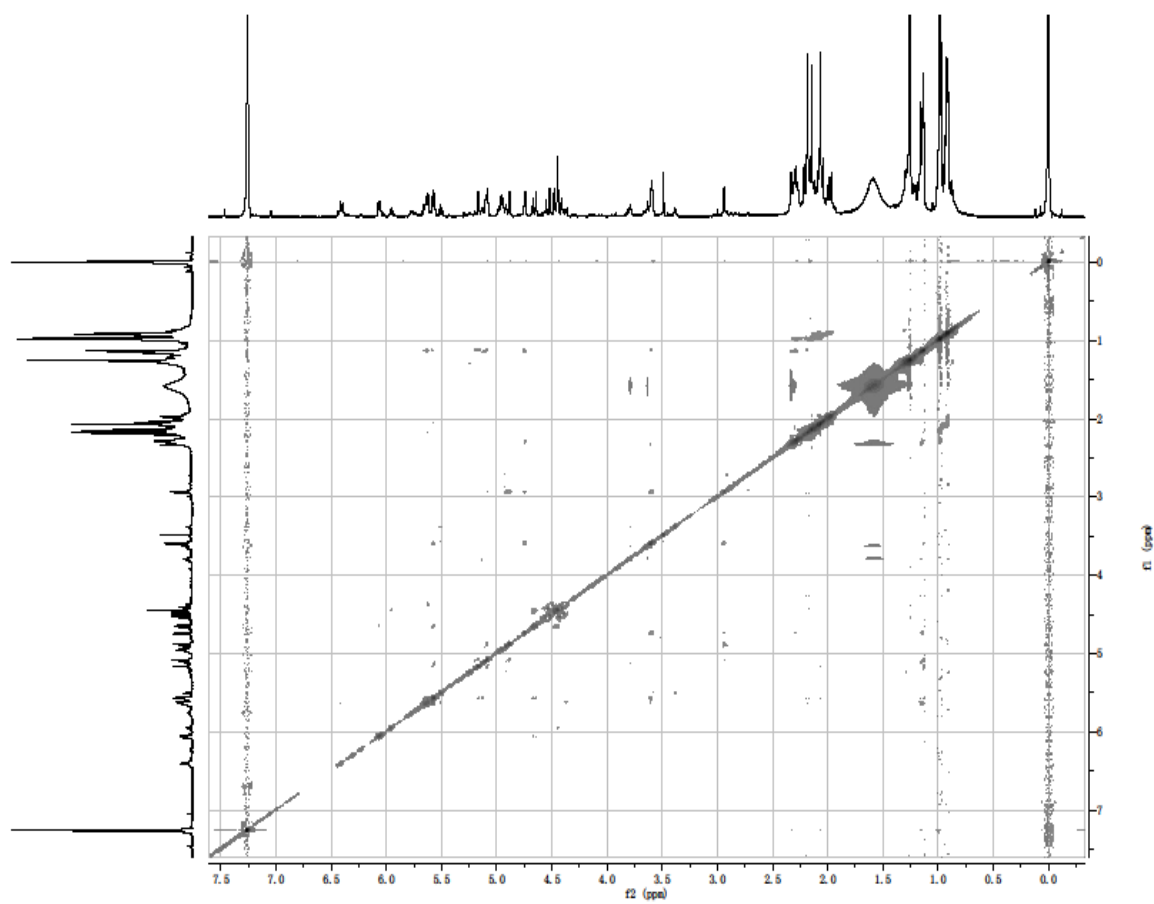



Figure S105. HRESI spectrum of compound 14.

Tolerance = 10.0 PPM / DBE: min = -1.5, max = 50.0  
 Selected filters: None

Monoisotopic Mass, Even Electron Ions  
 18 formula(e) evaluated with 1 results within limits (up to 50 closest results for each mass)  
 Elements Used:

C: 10-35 H: 10-60 O: 5-16 Na: 1-1 Cl: 1-1

SIPI  
 MC-10 M.W=714  
 WQ12-441H1 65 (2.247) AM (Cen,4, 80.00, Ar,5000.0,733.27,0.70); Sm (SG, 2x1.00); Cm (60:88)

04-Nov-2012,11:05:51

TOF MS ES+  
 4.07e3

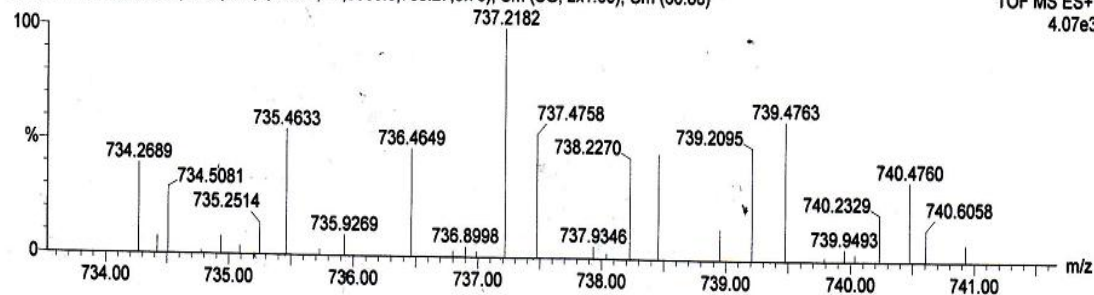

Minimum: 65.00  
 Maximum: 100.00

5.0 10.0 50.0  
 -1.5 50.0

| Mass     | RA     | Calc. Mass | mDa  | PPM  | DBE  | i-FIT | Formula           |
|----------|--------|------------|------|------|------|-------|-------------------|
| 737.2182 | 100.00 | 737.2188   | -0.6 | -0.8 | 11.5 | 22.3  | C33 H43 O15 Na Cl |

Figure S106. <sup>1</sup>H NMR spectrum of compound 14 in CDCl<sub>3</sub>.

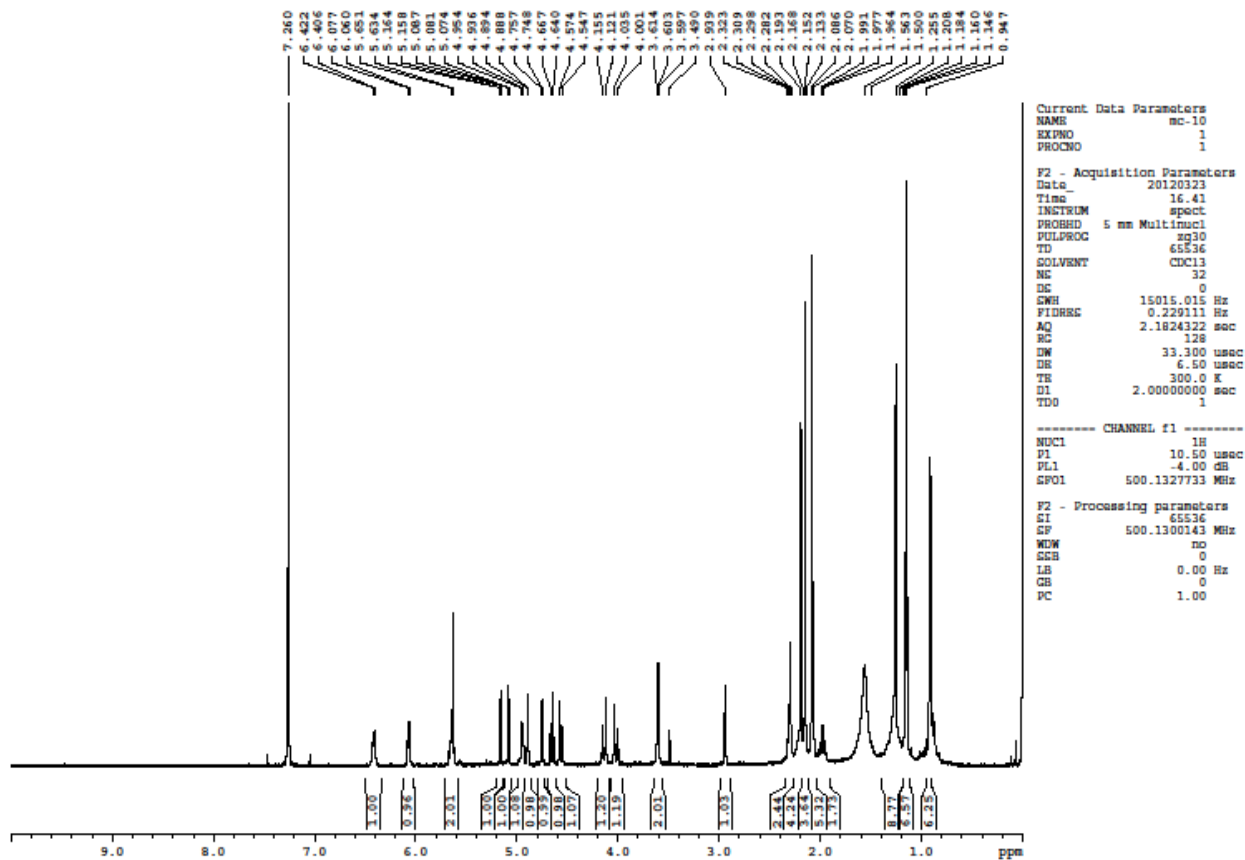

Figure S107. <sup>13</sup>C NMR spectrum of compound 14 in CDCl<sub>3</sub>.

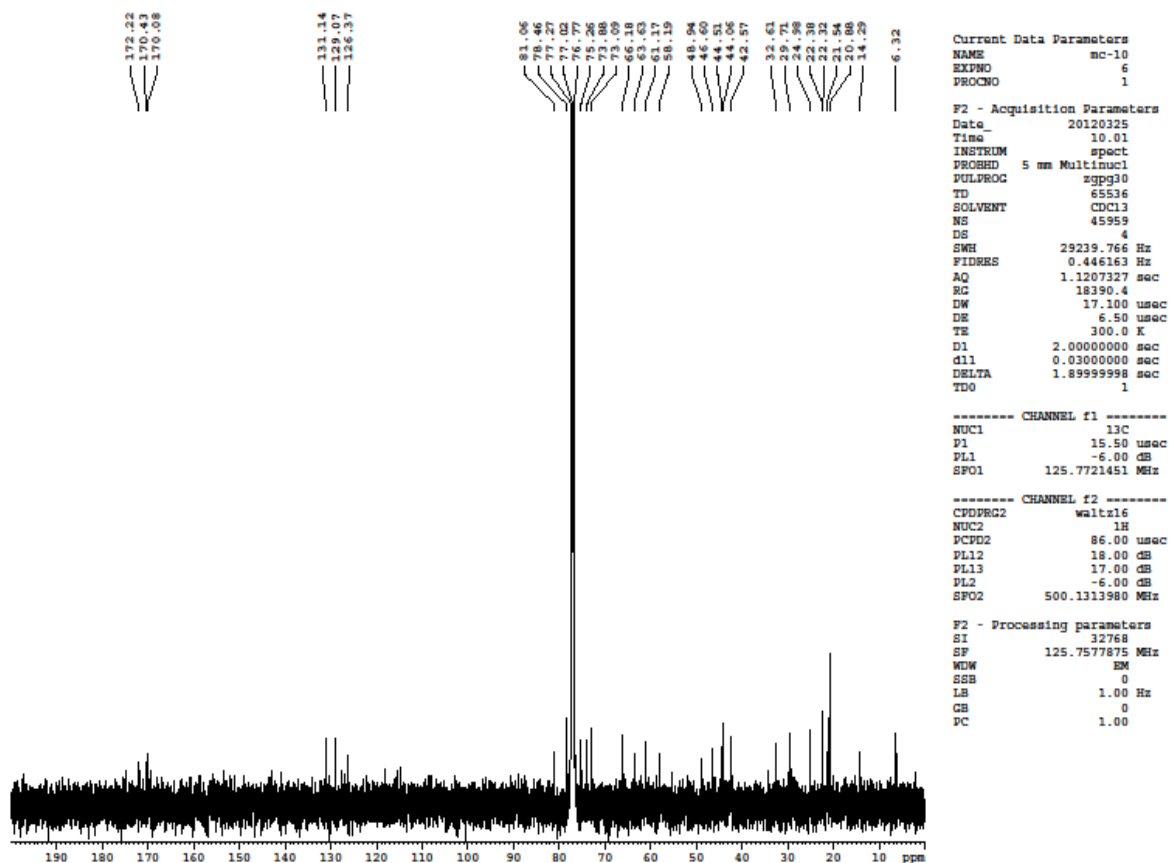

Figure S108. DEPT spectrum of compound 14 in CDCl<sub>3</sub>.

MC-10 dept135 in CDCl<sub>3</sub>

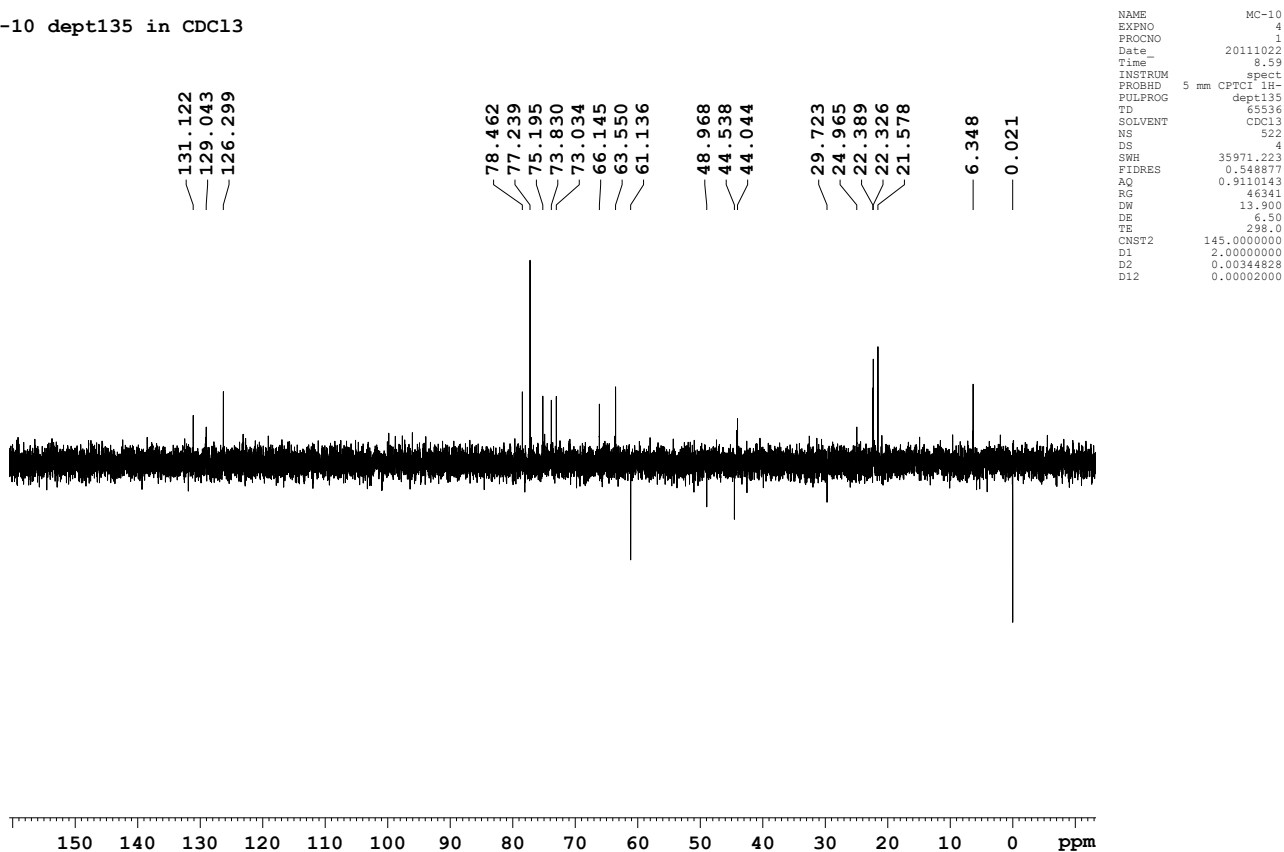

Figure S109. HSQC spectrum of compound **14** in CDCl<sub>3</sub>.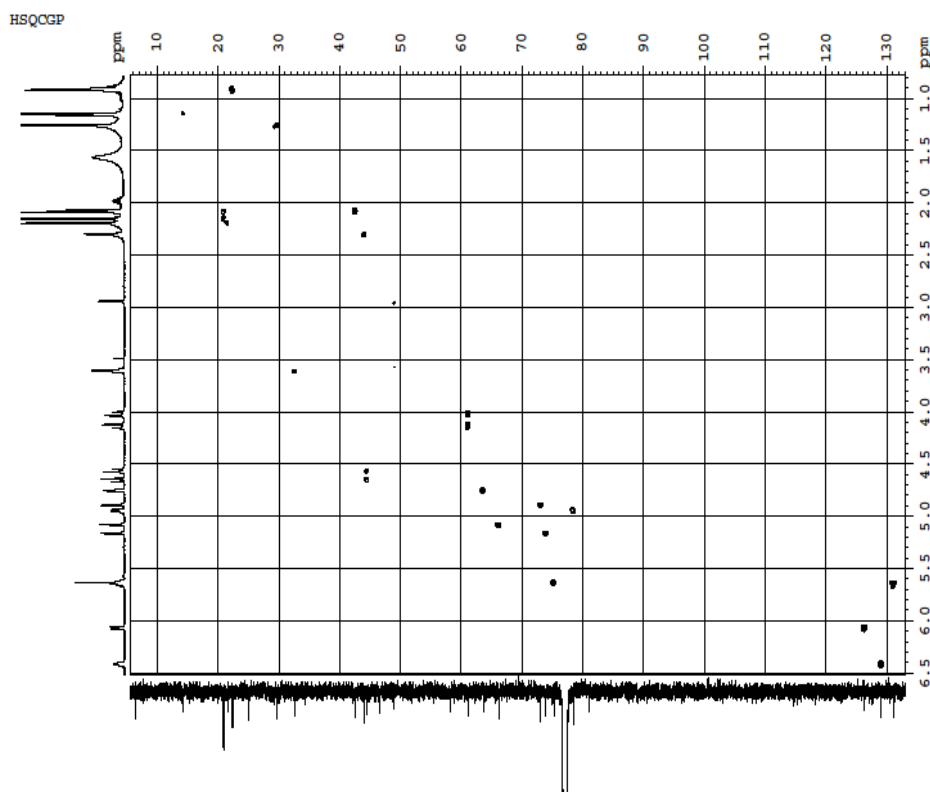Figure S110. <sup>1</sup>H-<sup>1</sup>H COSY spectrum of compound **14** in CDCl<sub>3</sub>.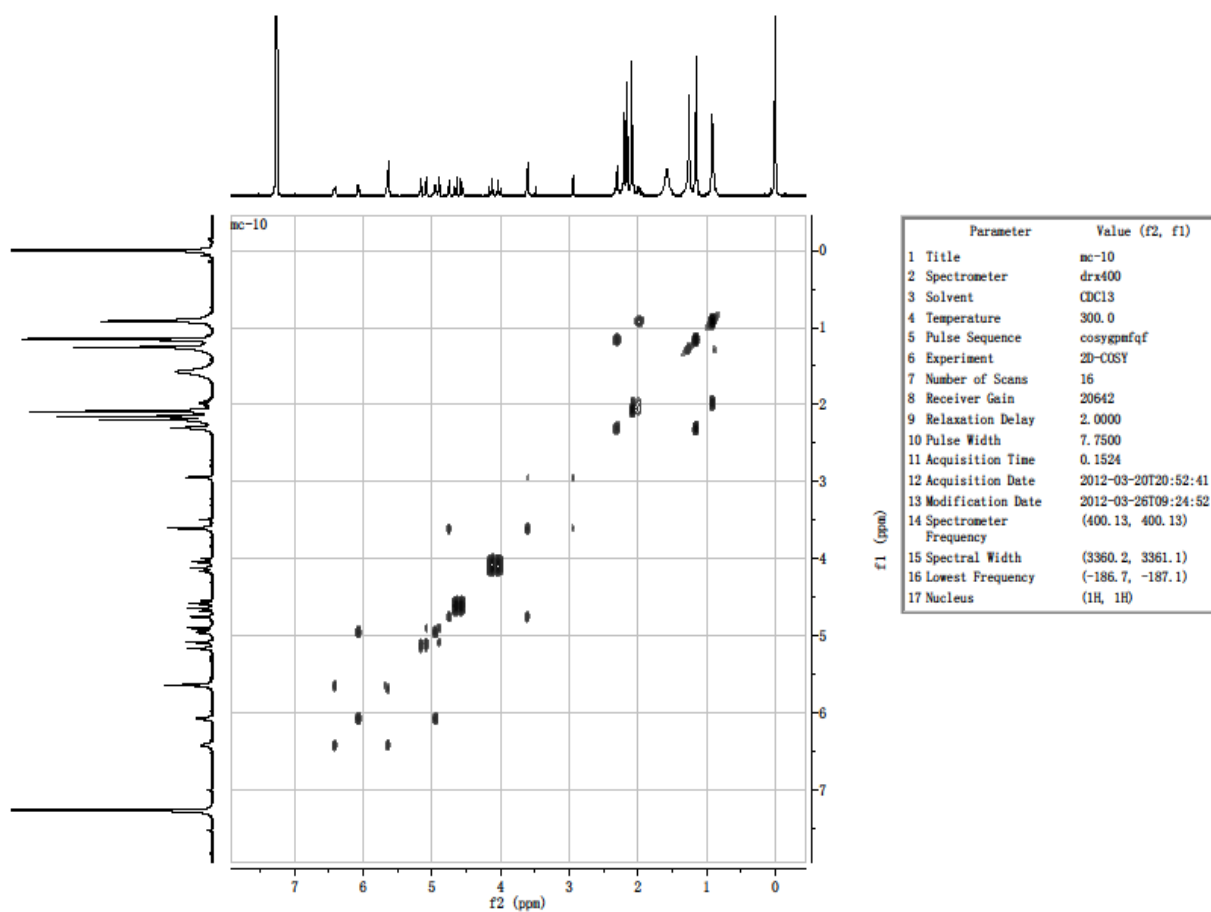

Figure S111. HMBC spectrum of compound 14 in CDCl<sub>3</sub>.

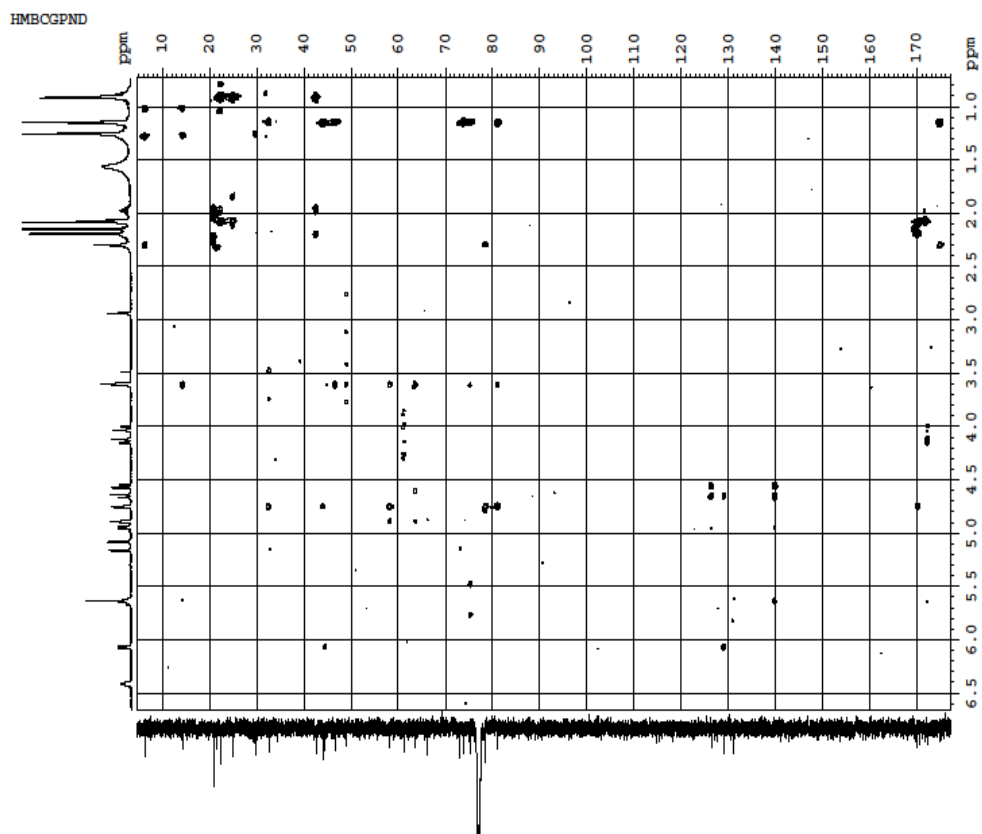

Figure S112. NOESY spectrum of compound 14 in CDCl<sub>3</sub>.

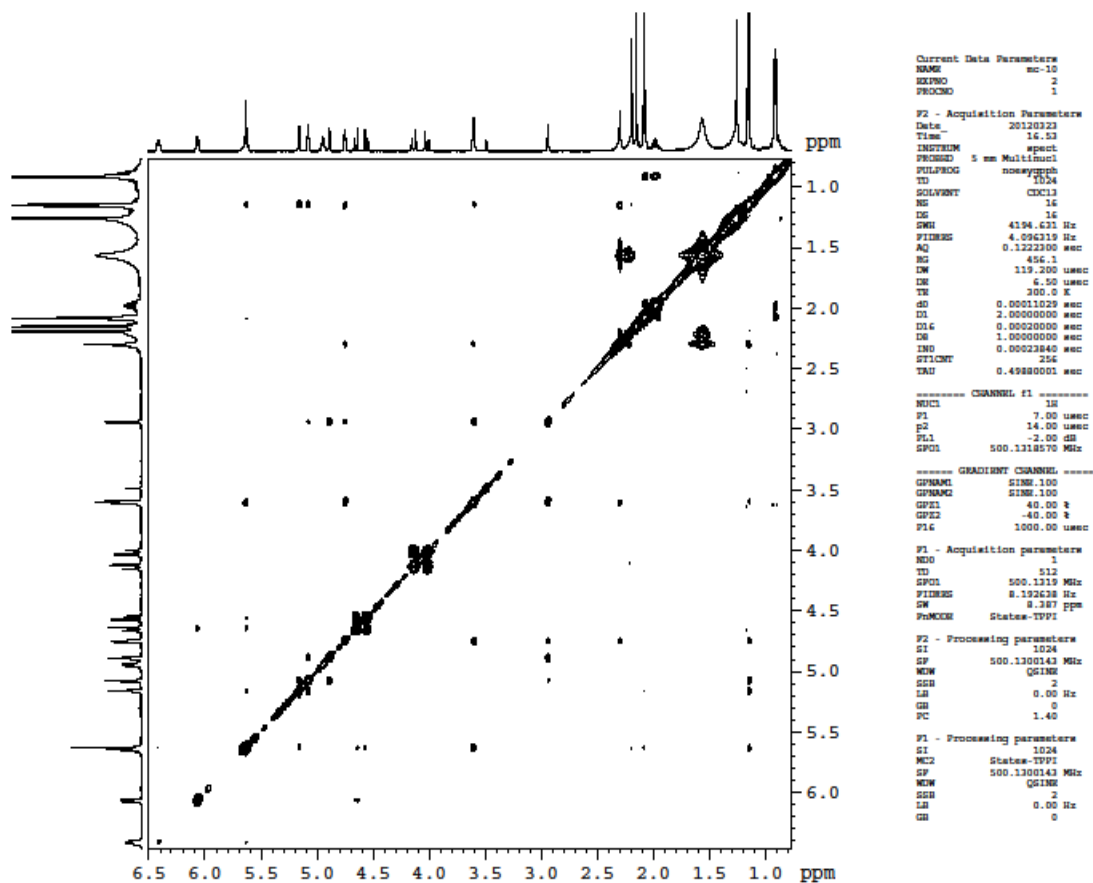

**Figure S113.** HR-ESIMS spectrum of the new compound **15**.

Tolerance = 5.0 PPM / DBE: min = -1.5, max = 50.0  
 Selected filters: None

Monoisotopic Mass, Even Electron Ions  
 41 formula(e) evaluated with 1 results within limits (up to 50 closest results for each mass)  
 Elements Used:  
 C: 5-45 H: 10-70 O: 1-20 Na: 1-1

SIPI  
 LA-21 M.W=822  
 WQ10385H 35 (1.209) AM (Cen,6, 80.00, Ar,5000.0,837.53,1.00); Sm (SG, 2x3.00); Cm (21:42)  
 Q-ToF micro YA019  
 13-Oct-2010,15:01:16  
 0.00000000  
 TOF MS ES+  
 3.80e5

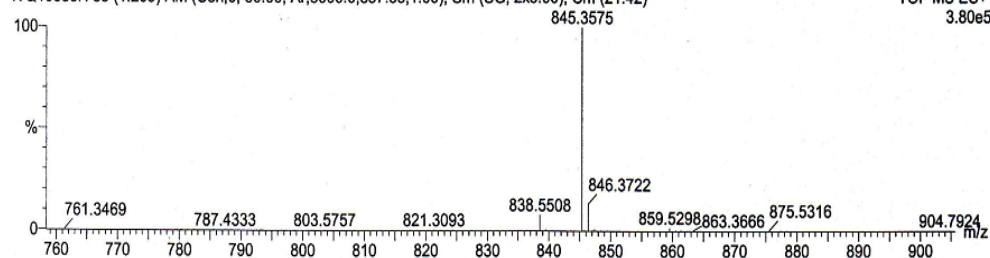

| Mass     | RA     | Calc. Mass | mDa | PPM | DBE  | i-FIT    | Formula        |
|----------|--------|------------|-----|-----|------|----------|----------------|
| 845.3575 | 100.00 | 845.3572   | 0.3 | 0.4 | 12.5 | 135178.0 | C41 H58 O17 Na |

**Figure S114.** <sup>1</sup>H NMR spectrum of the new compound **15**.

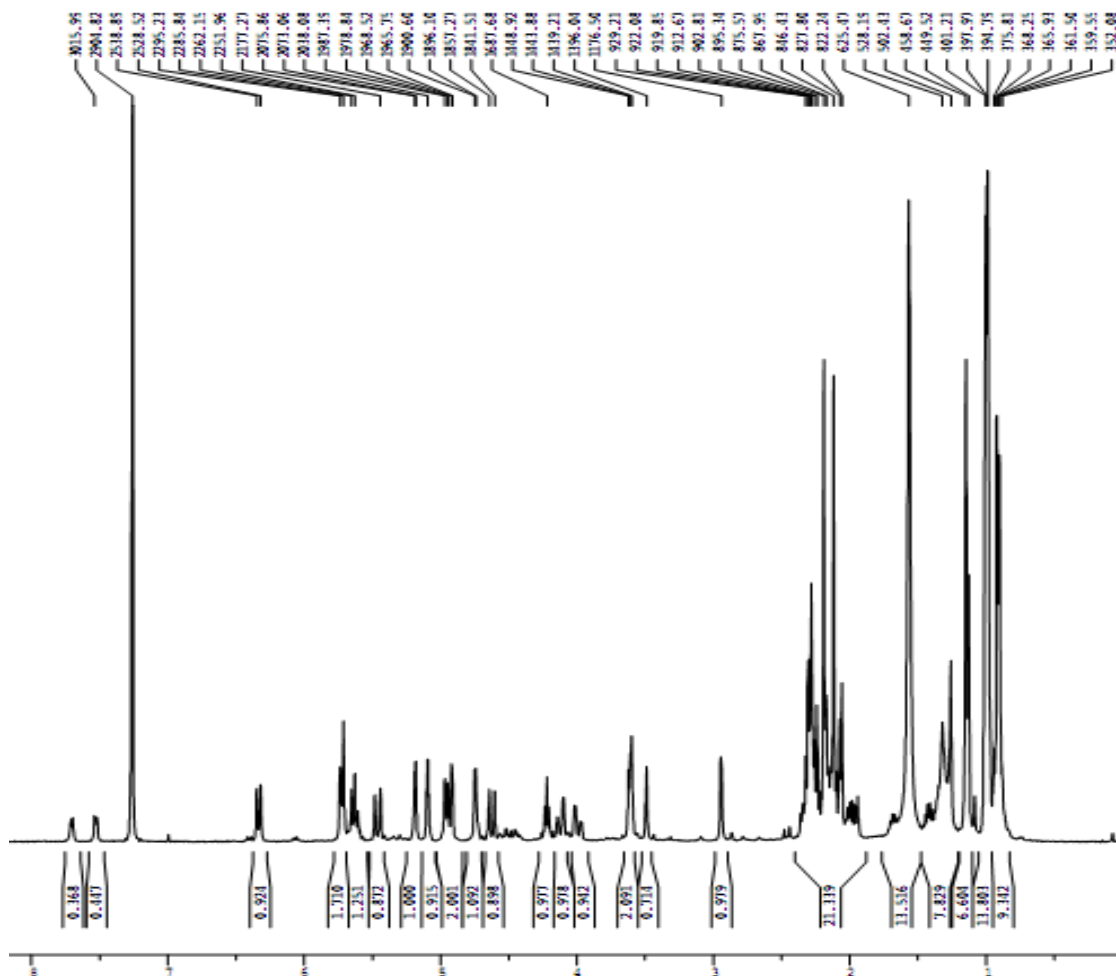

Figure S115. <sup>13</sup>C NMR spectrum of the new compound 15.

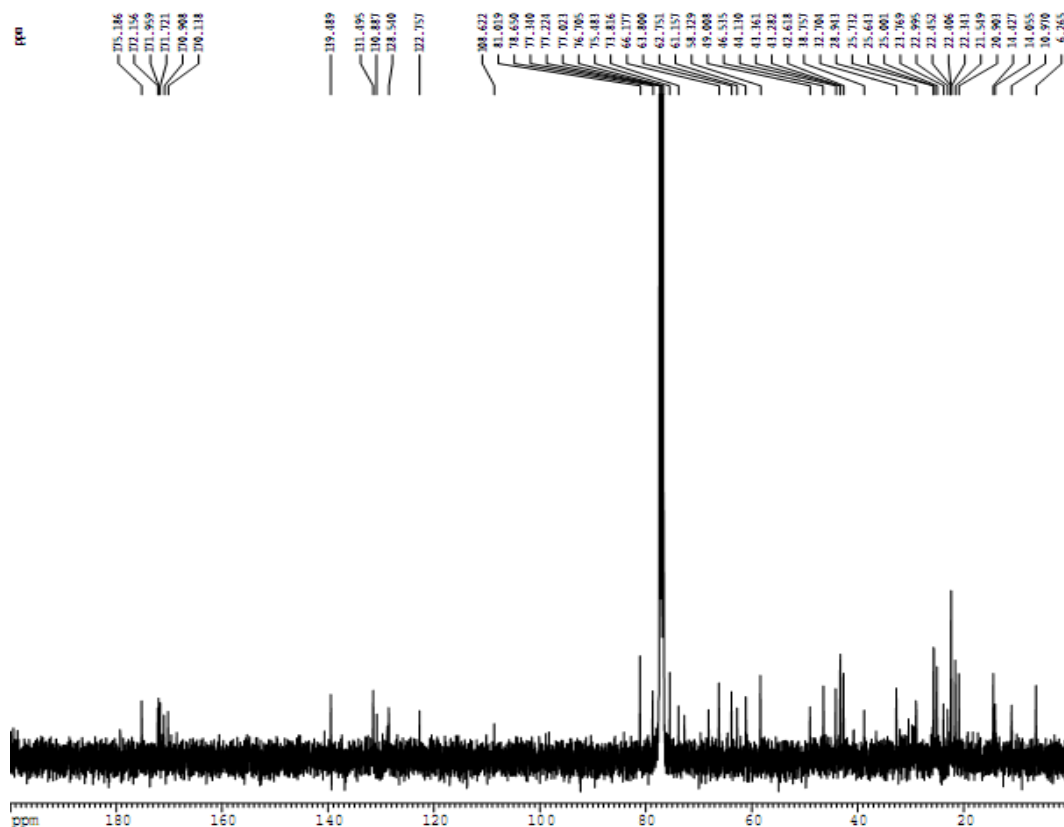

Figure S116. DEPT spectrum of the new compound 15.

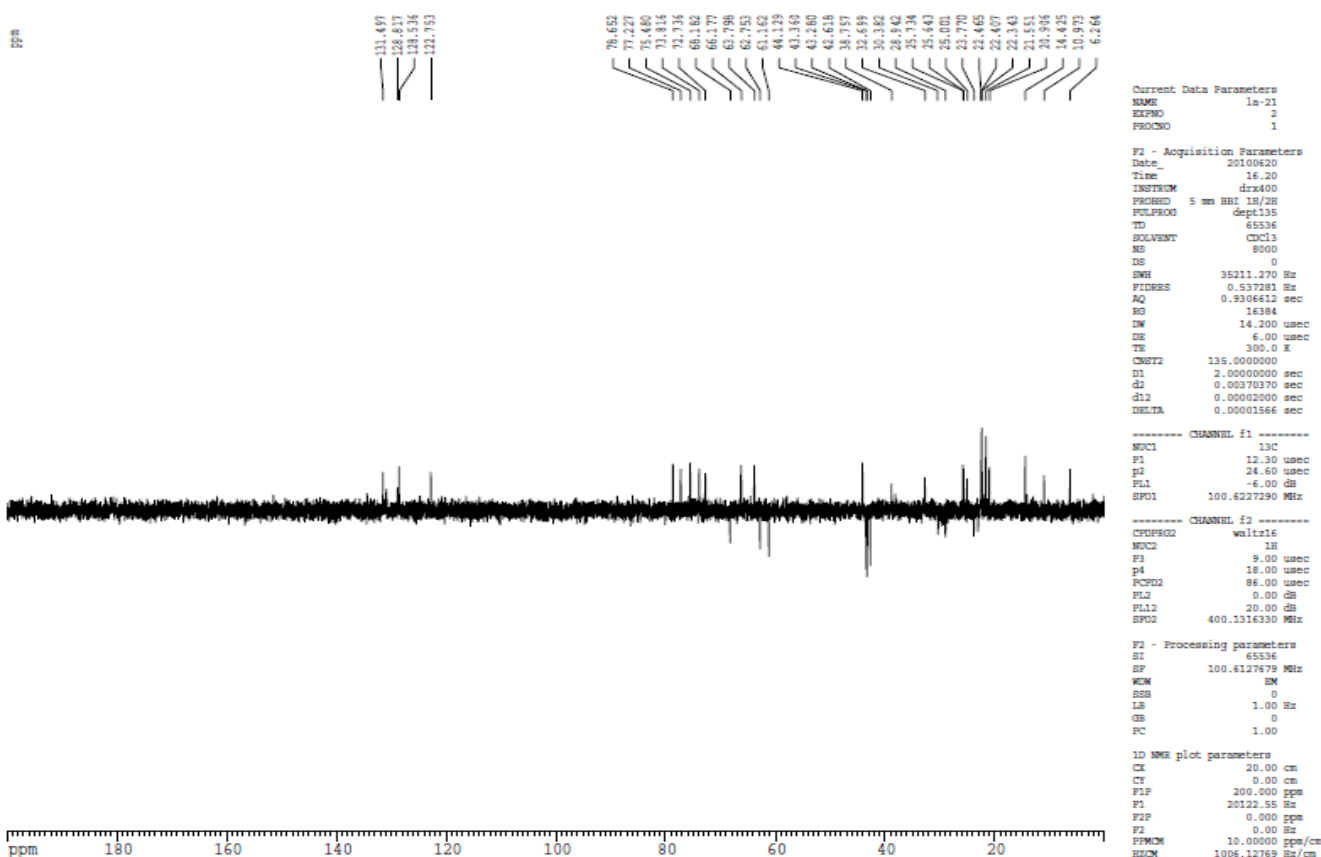

**Figure S117.** HSQC spectrum of the new compound 15.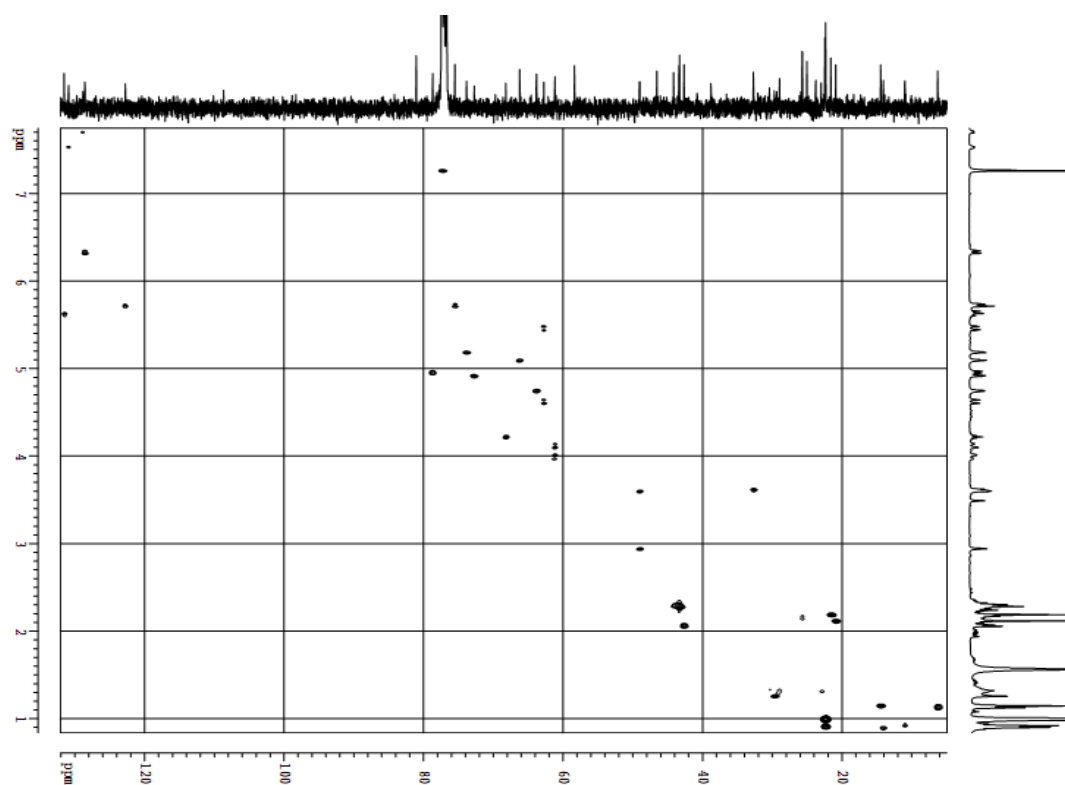**Figure S118.**  $^1\text{H}$ - $^1\text{H}$  COSY spectrum of the new compound 15.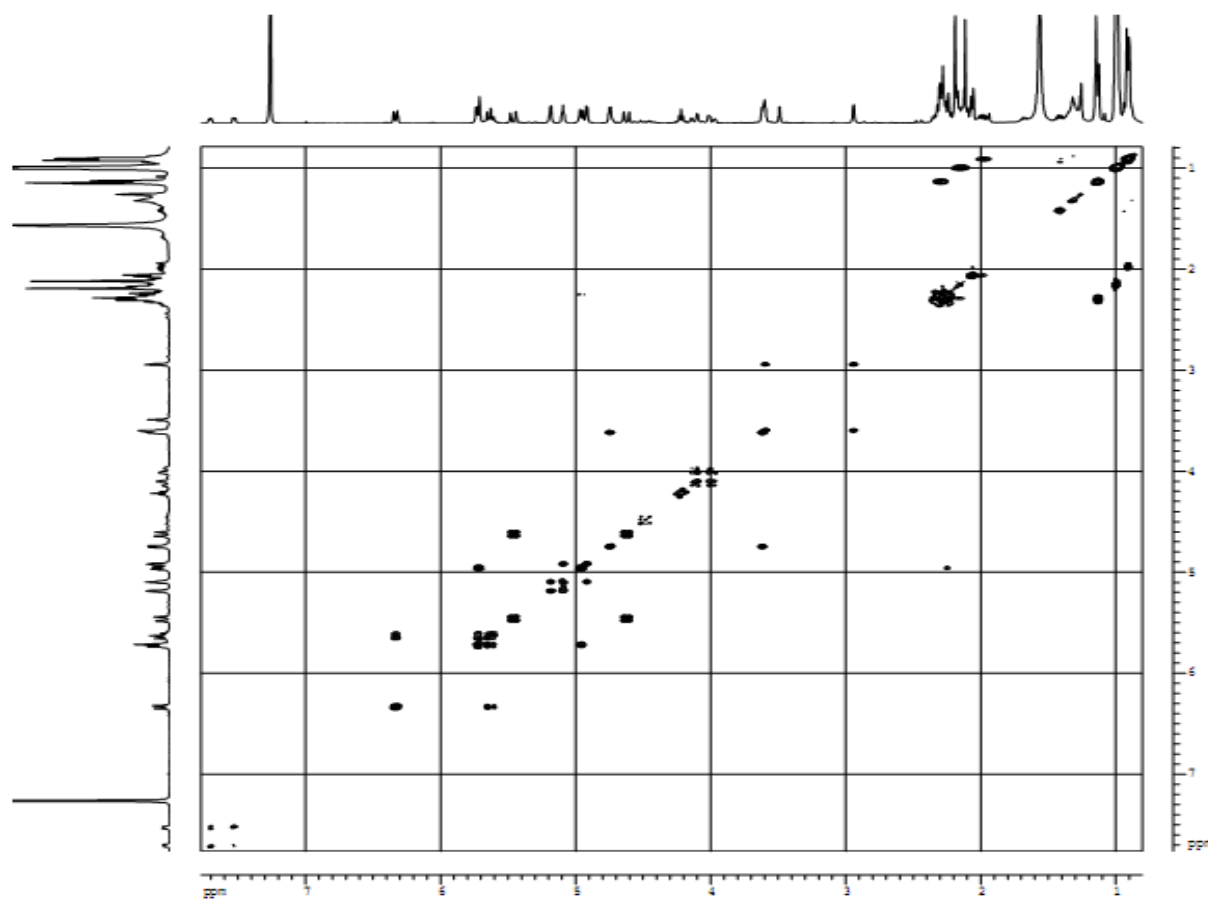

**Figure S119.** HMBC spectrum of the new compound 15.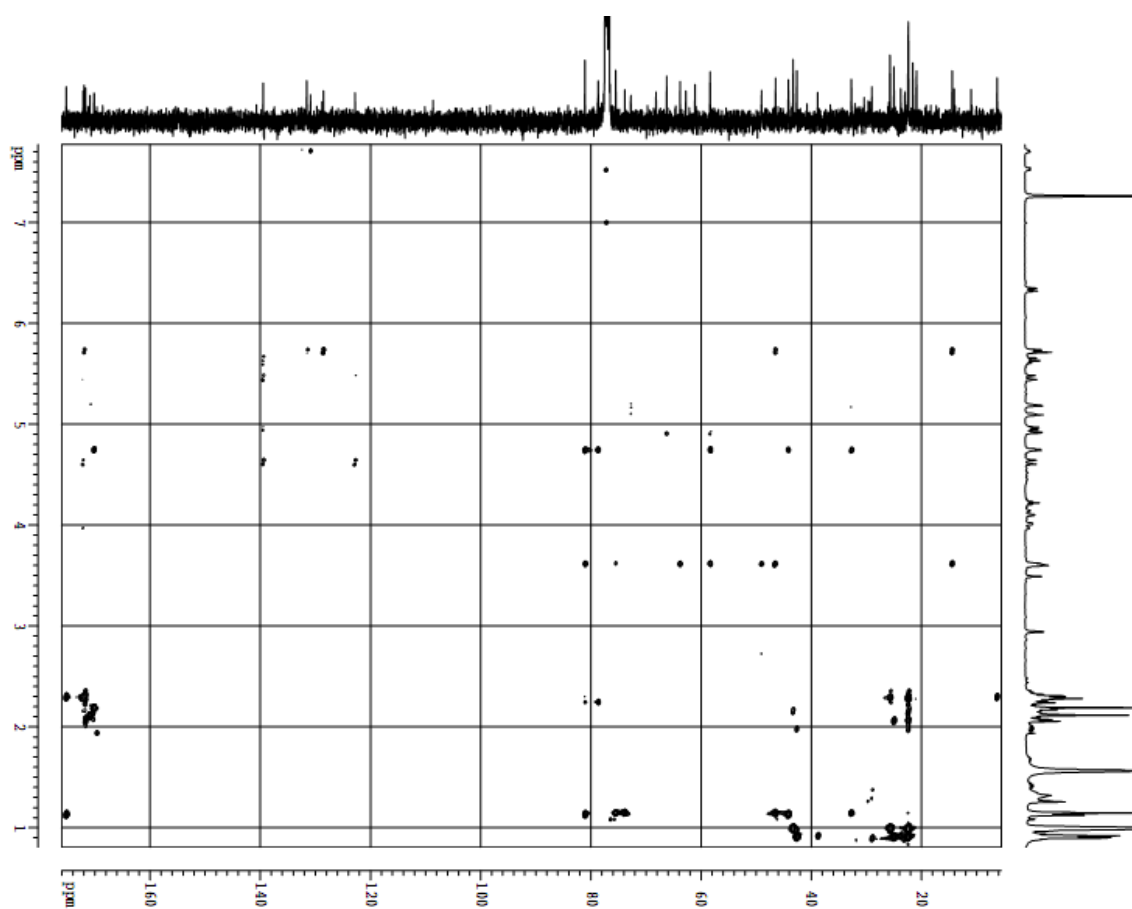**Figure S120.** NOESY spectrum of the new compound 15.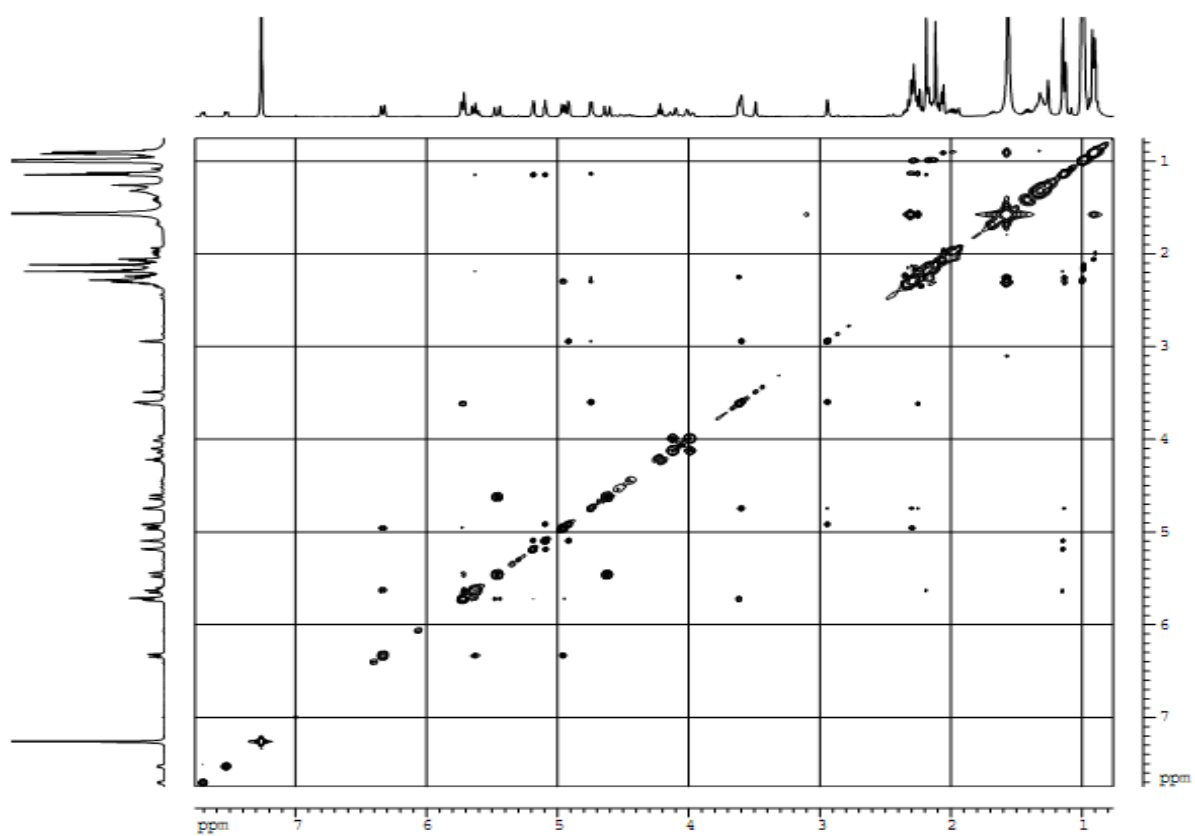



Figure S121. HRESIMS spectrum of compound 16.

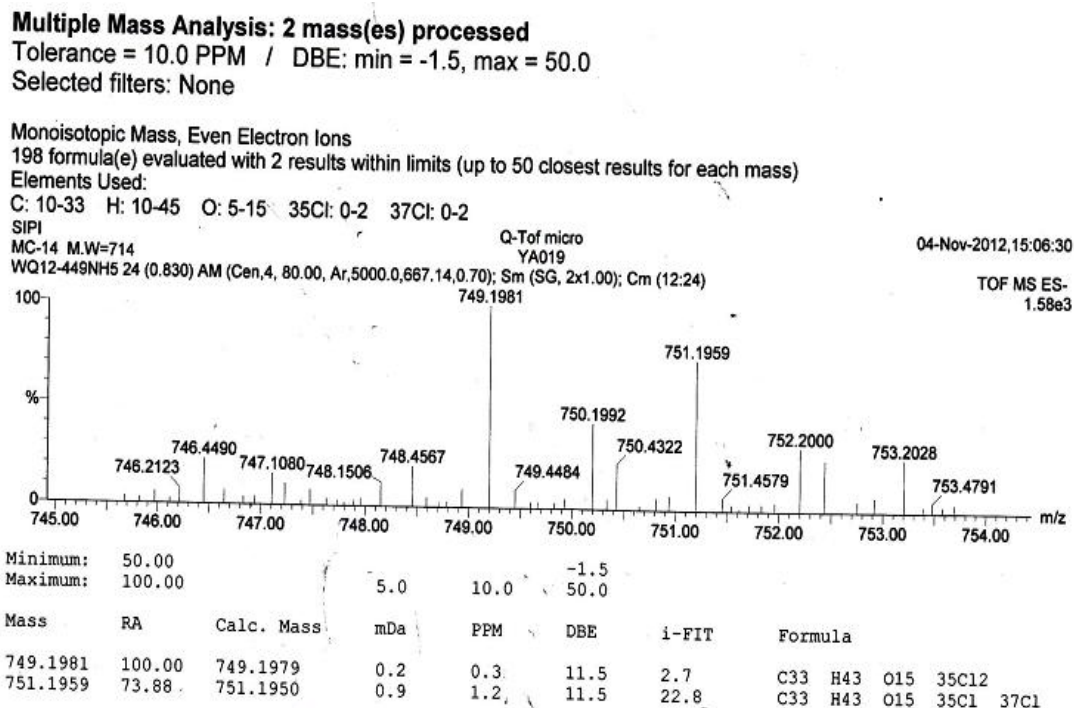

Figure S122. <sup>1</sup>H NMR spectrum of compound 16 in CDCl<sub>3</sub>.

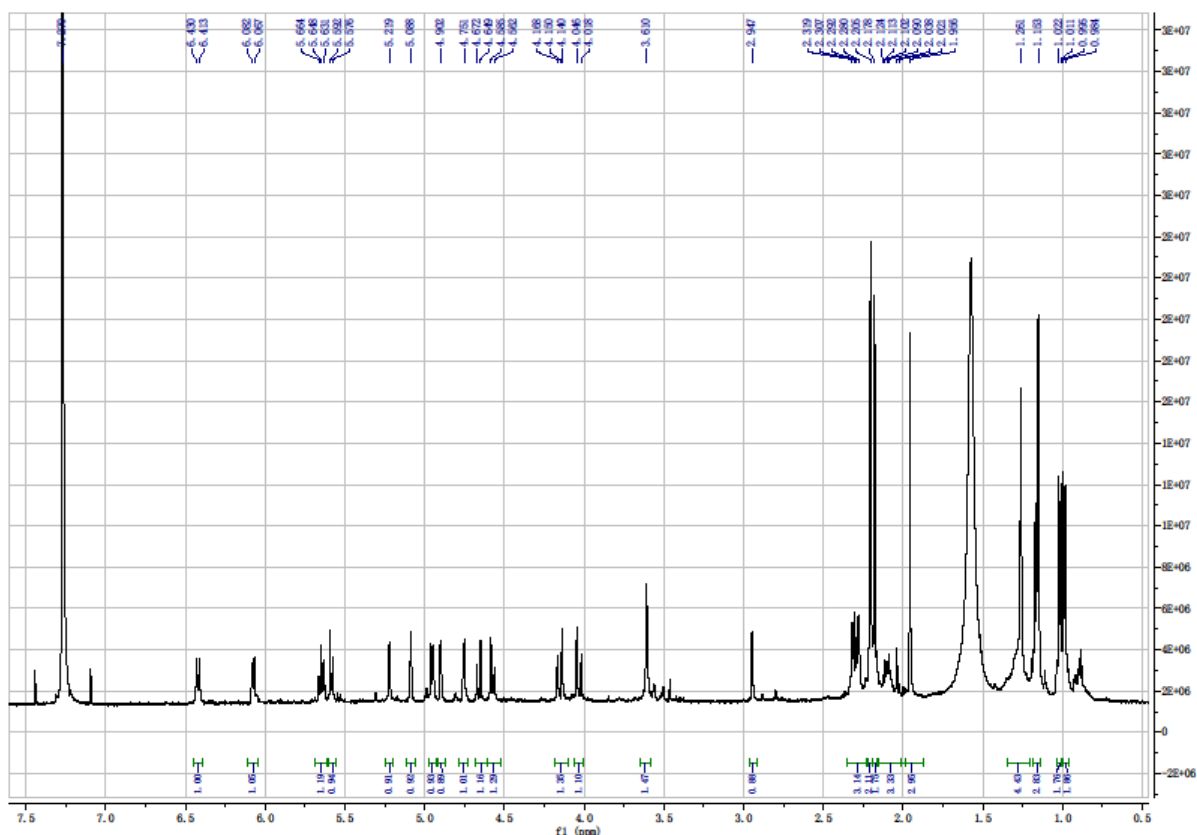

**Figure S123.**  $^{13}\text{C}$  NMR spectrum of compound **16** in  $\text{CDCl}_3$ .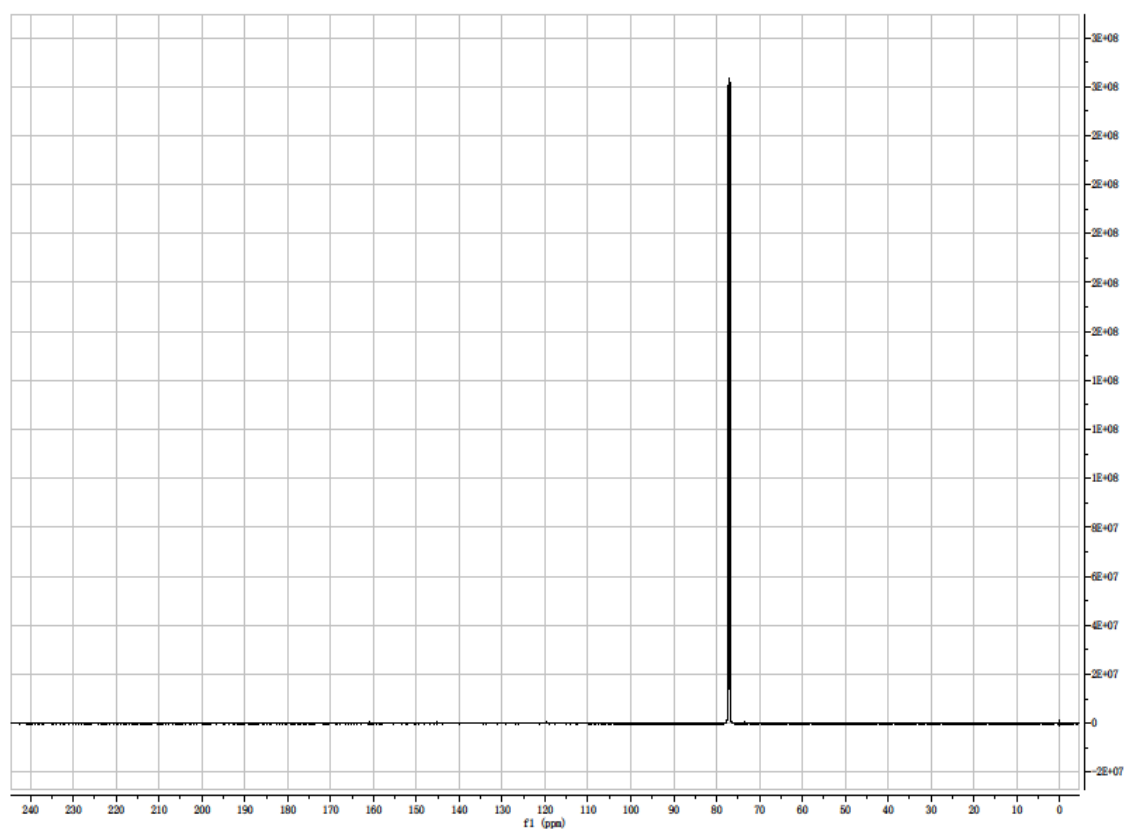**Figure S124.** DEPT spectrum of compound **16** in  $\text{CDCl}_3$ .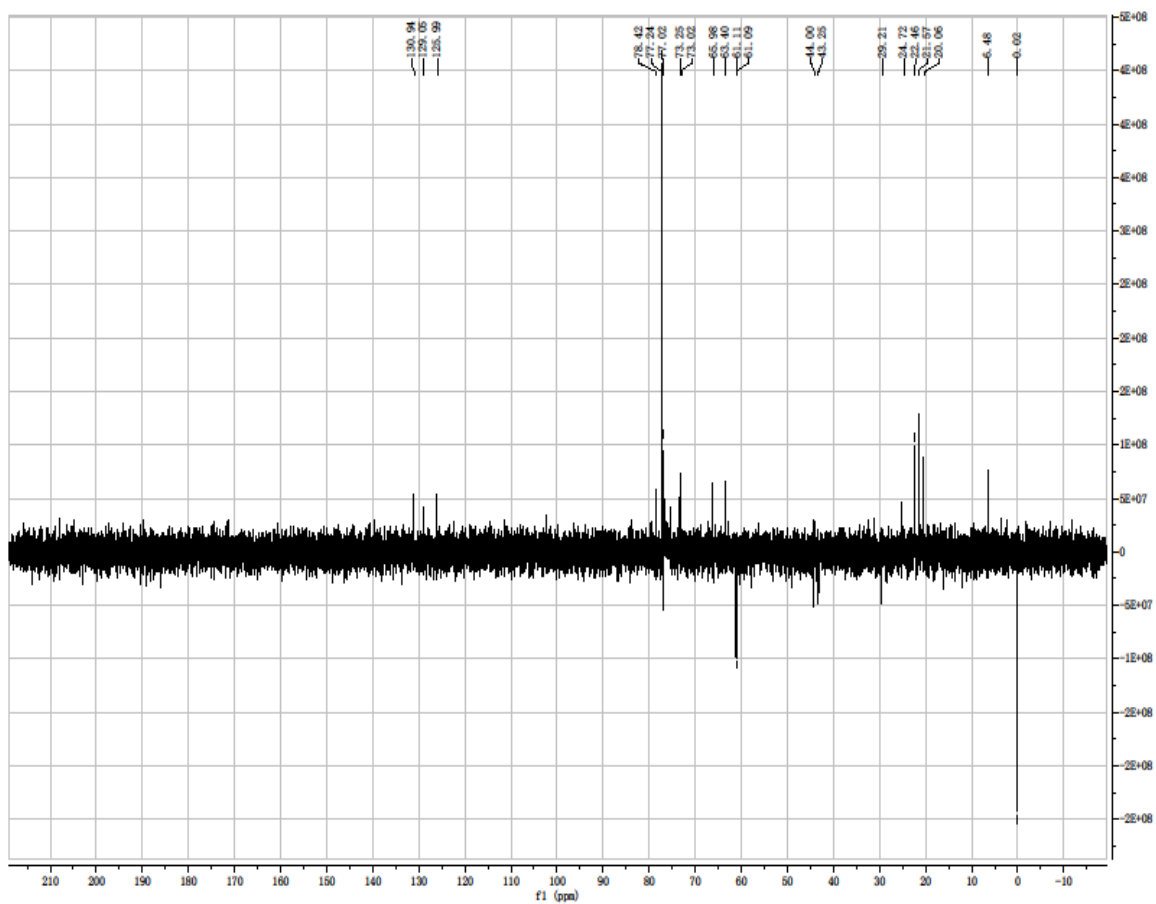

**Figure S125.** HSQC spectrum of compound **16** in CDCl<sub>3</sub>.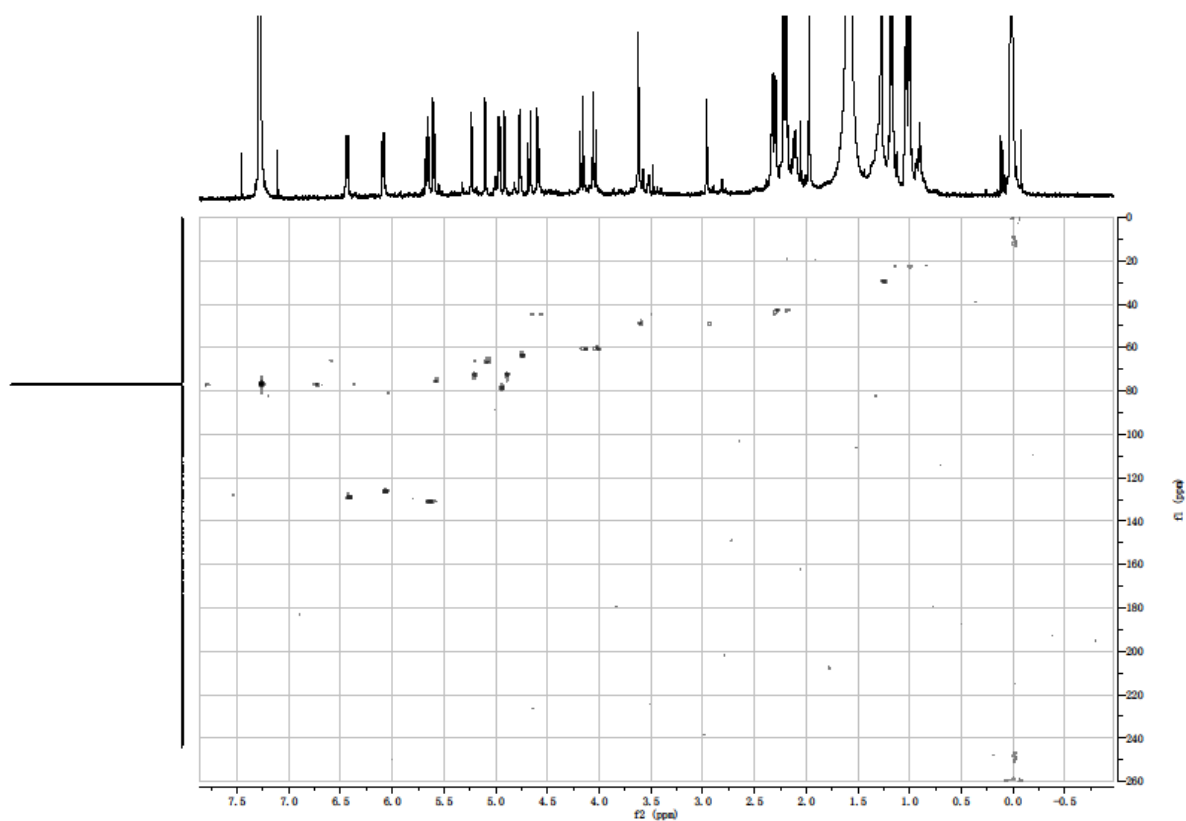**Figure S126.** <sup>1</sup>H-<sup>1</sup>H COSY spectrum of compound **16** in CDCl<sub>3</sub>.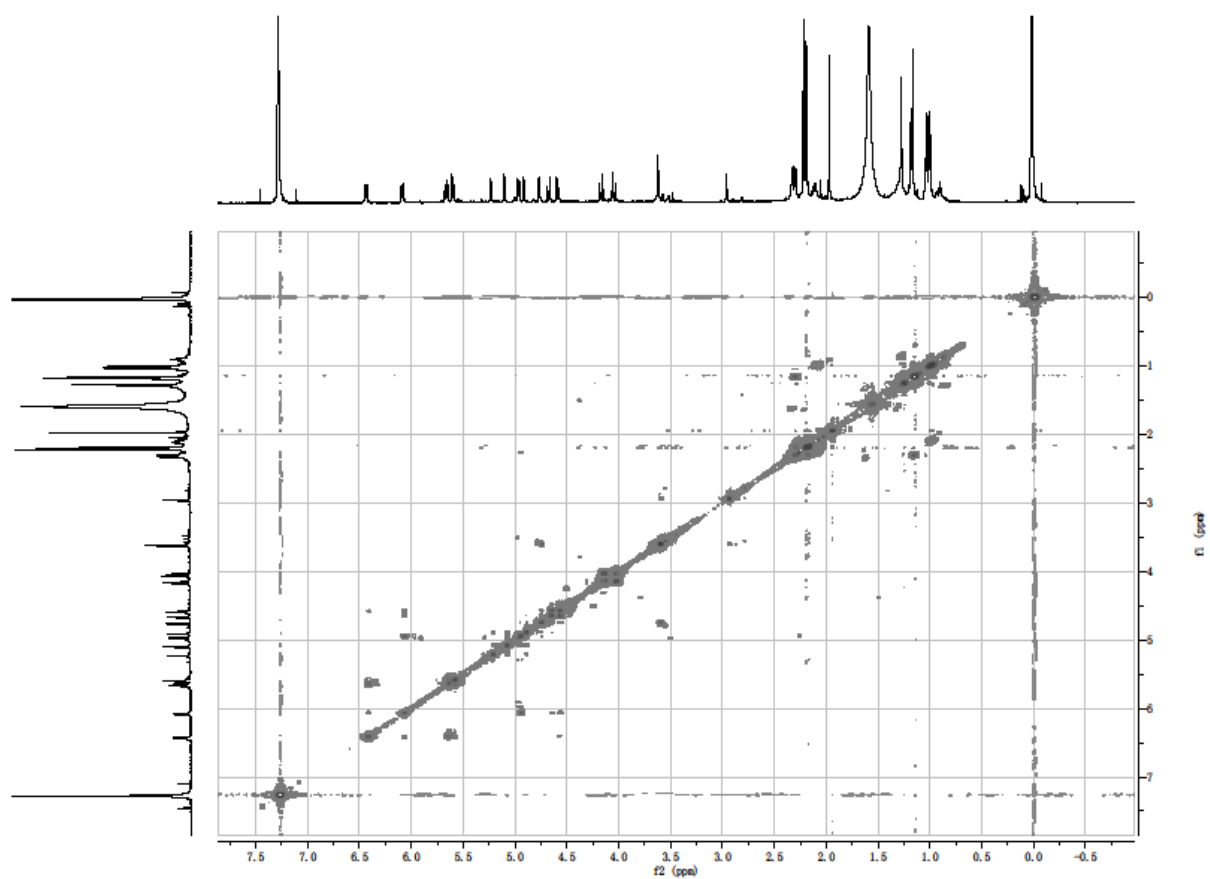

**Figure S127.** HMBC spectrum of compound **16** in CDCl<sub>3</sub>.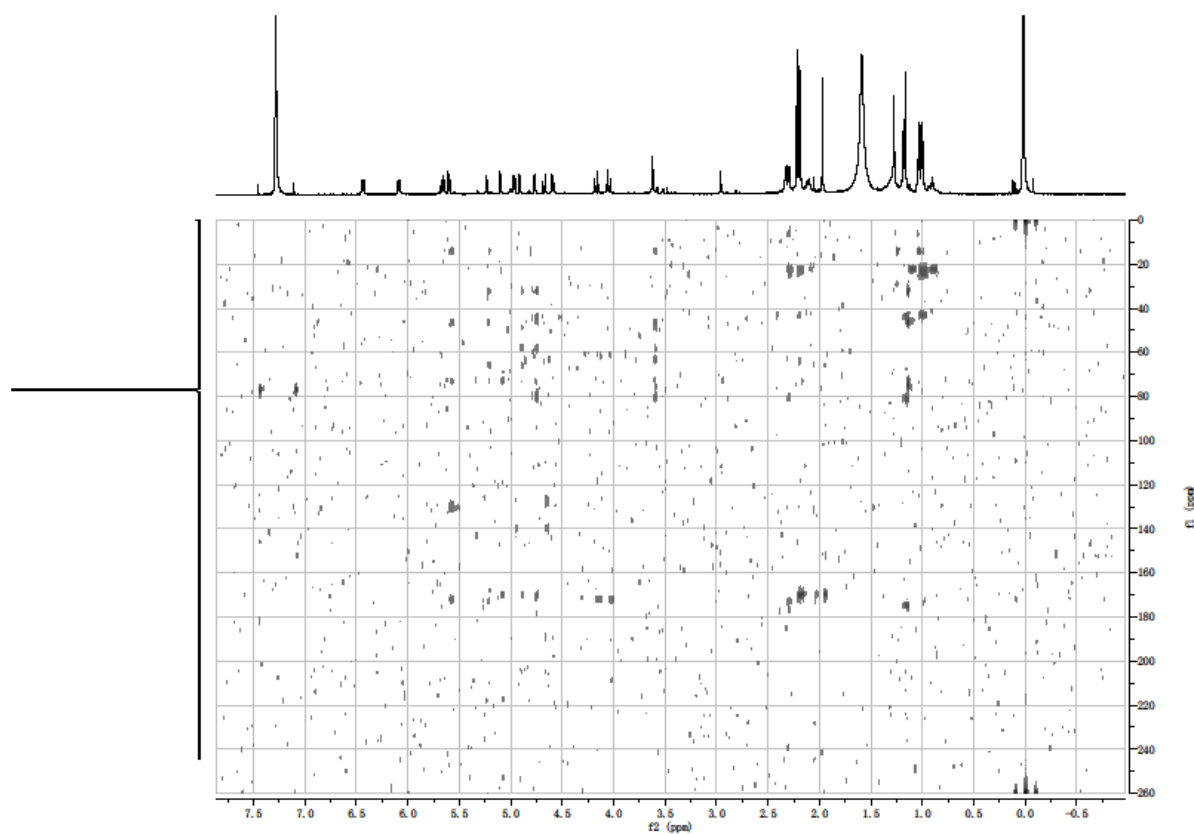**Figure S128.** NOESY spectrum of compound **16** in CDCl<sub>3</sub>.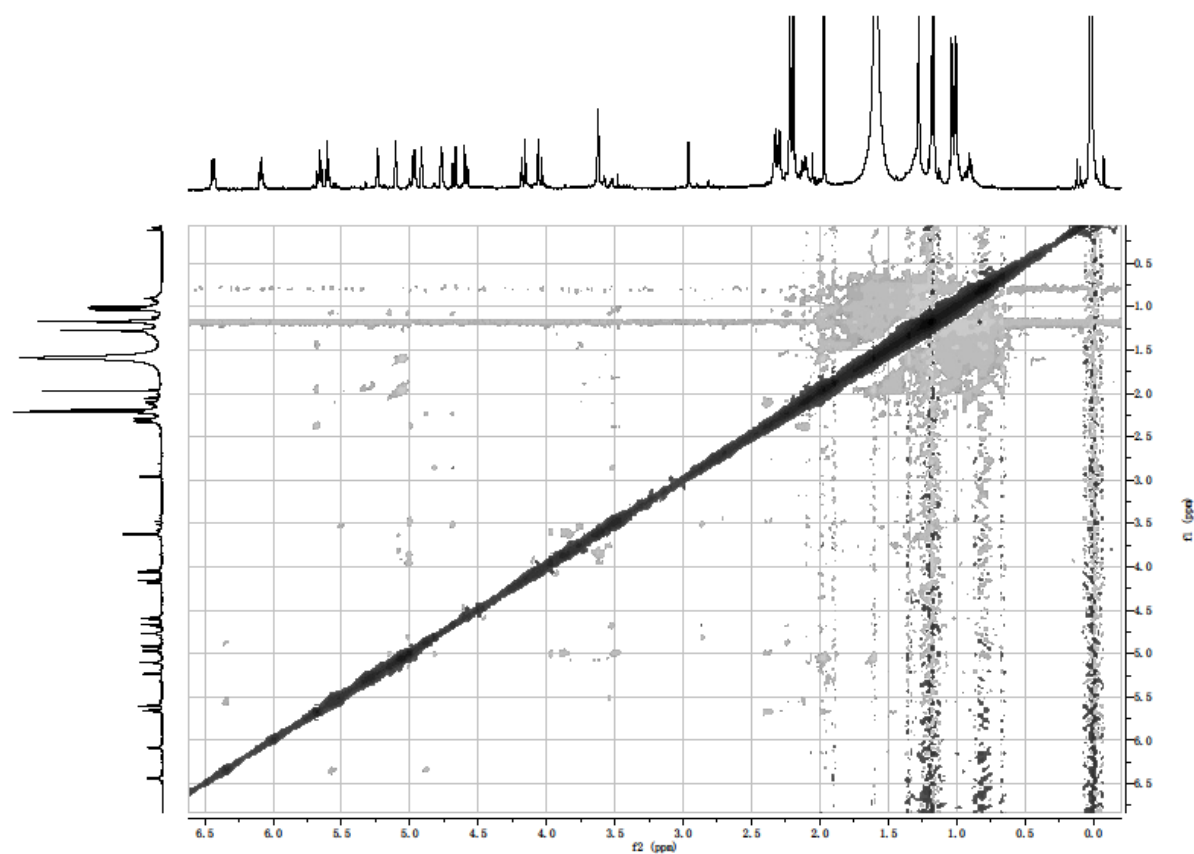

Figure S129. HR-ESIMS spectrum of the new compound 17.

**Multiple Mass Analysis: 2 mass(es) processed**

Tolerance = 10.0 PPM / DBE: min = -1.5, max = 50.0

Selected filters: None

Monoisotopic Mass, Even Electron Ions

15 formula(e) evaluated with 1 results within limits (up to 50 closest results for each mass)

Elements Used:

C: 5-35 H: 1-50 O: 2-15 Na: 1-1

SIPI

LC-55 M.W.=680

Q101316H 74 (2.558) AM (Cen,6, 80.00, Ar,5000.0,717.27,0.70); Sm (SG, 2x3.00); Cm (58:86)

Q-ToF micro  
YA019

29-Jun-2010,11:00:19

0.00000000

TOF MS ES+

4.60e5

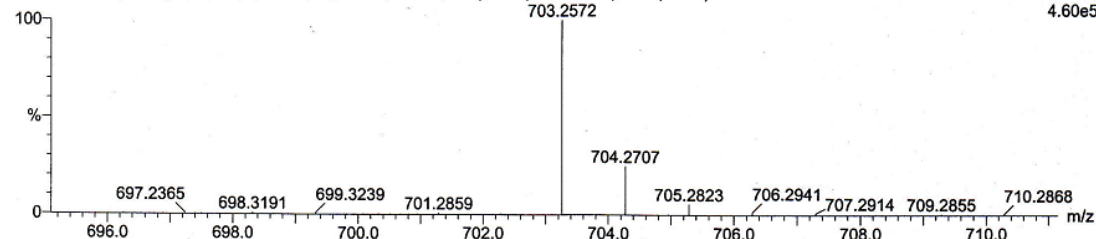

Minimum: 30.00  
Maximum: 100.00

| Mass     | RA     | Calc. Mass | mDa  | PPM  | DBE  | i-FIT   | Formula        |
|----------|--------|------------|------|------|------|---------|----------------|
| 703.2572 | 100.00 | 703.2578   | -0.6 | -0.9 | 11.5 | 14762.5 | C33 H44 O15 Na |

Figure S130. <sup>1</sup>H MNR (400 MHz, CDCl<sub>3</sub>) spectrum of the new compound 17.

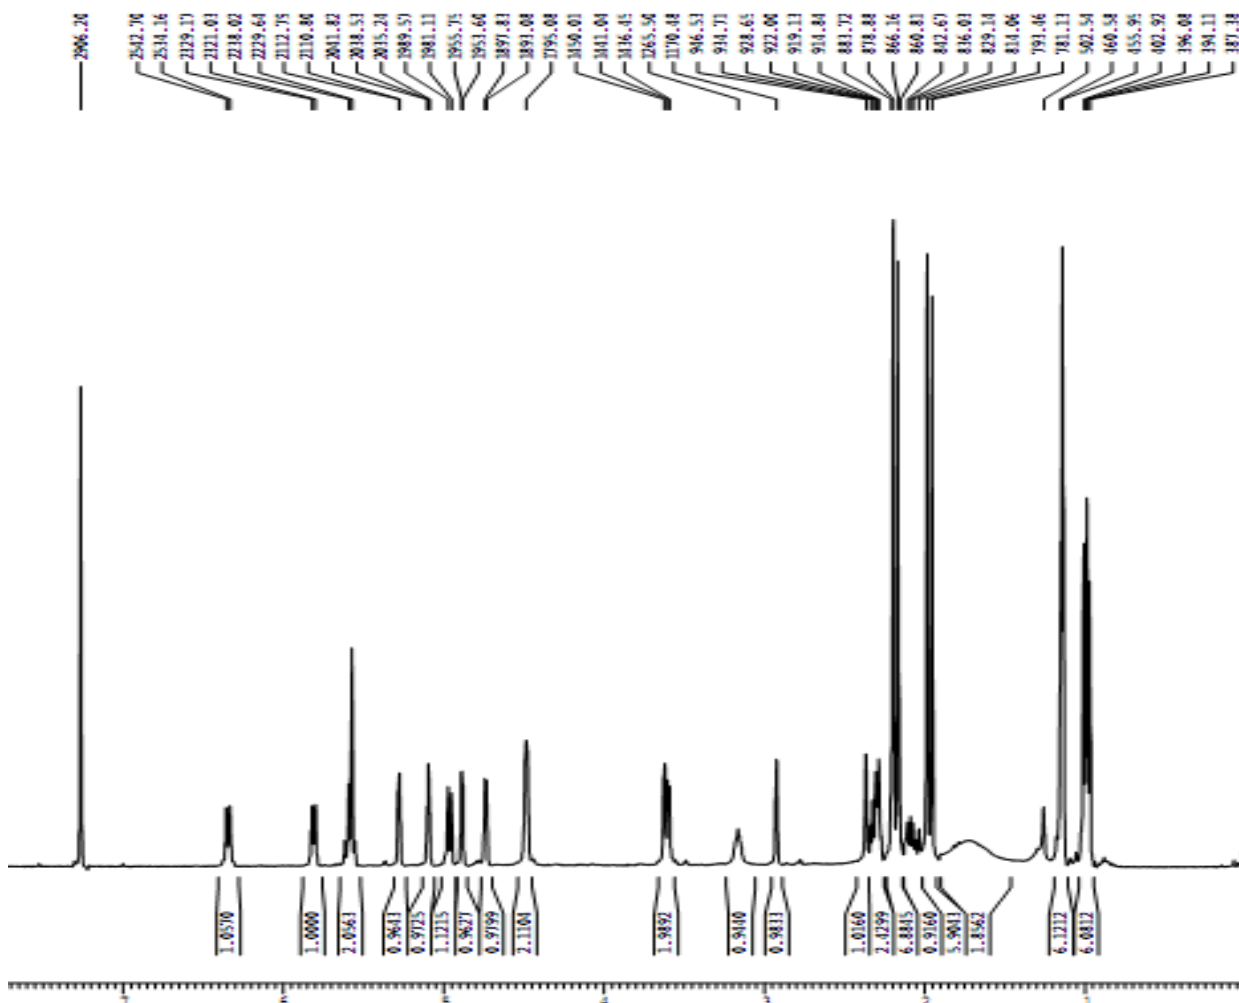

Figure S131. <sup>13</sup>C MNR (100 MHz, CDCl<sub>3</sub>) spectrum of the new compound 17.

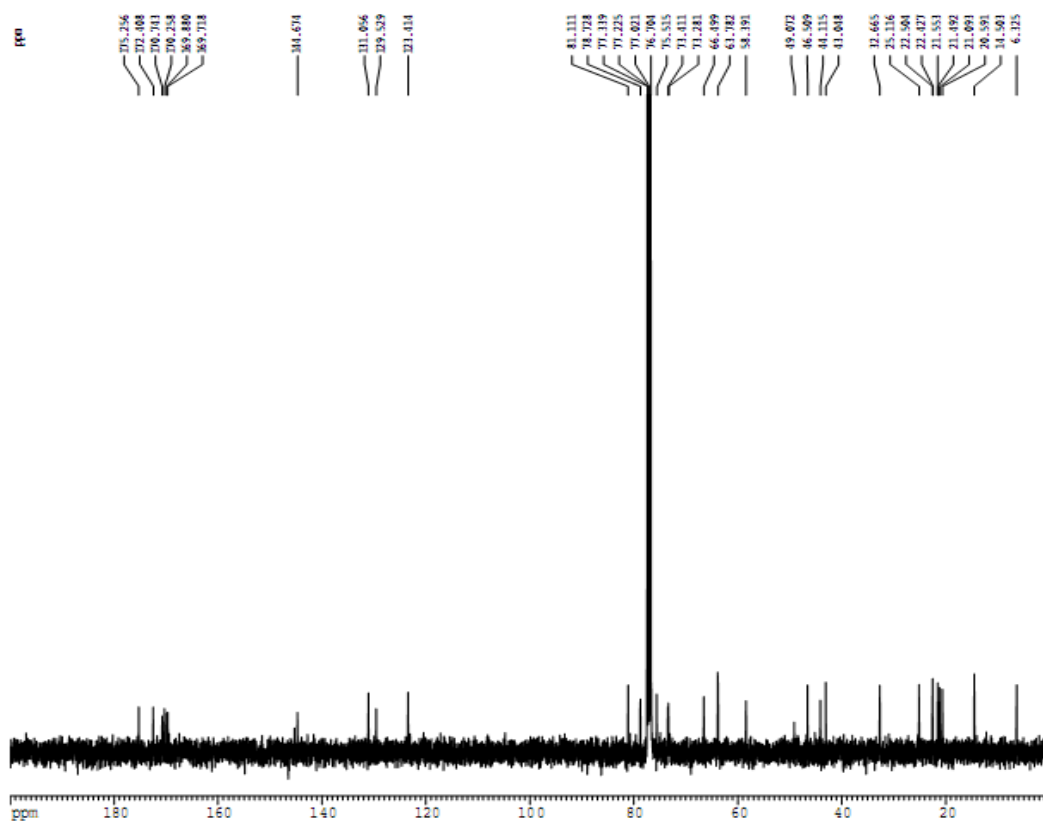

Figure S132. DEPT spectrum of the new compound 17.

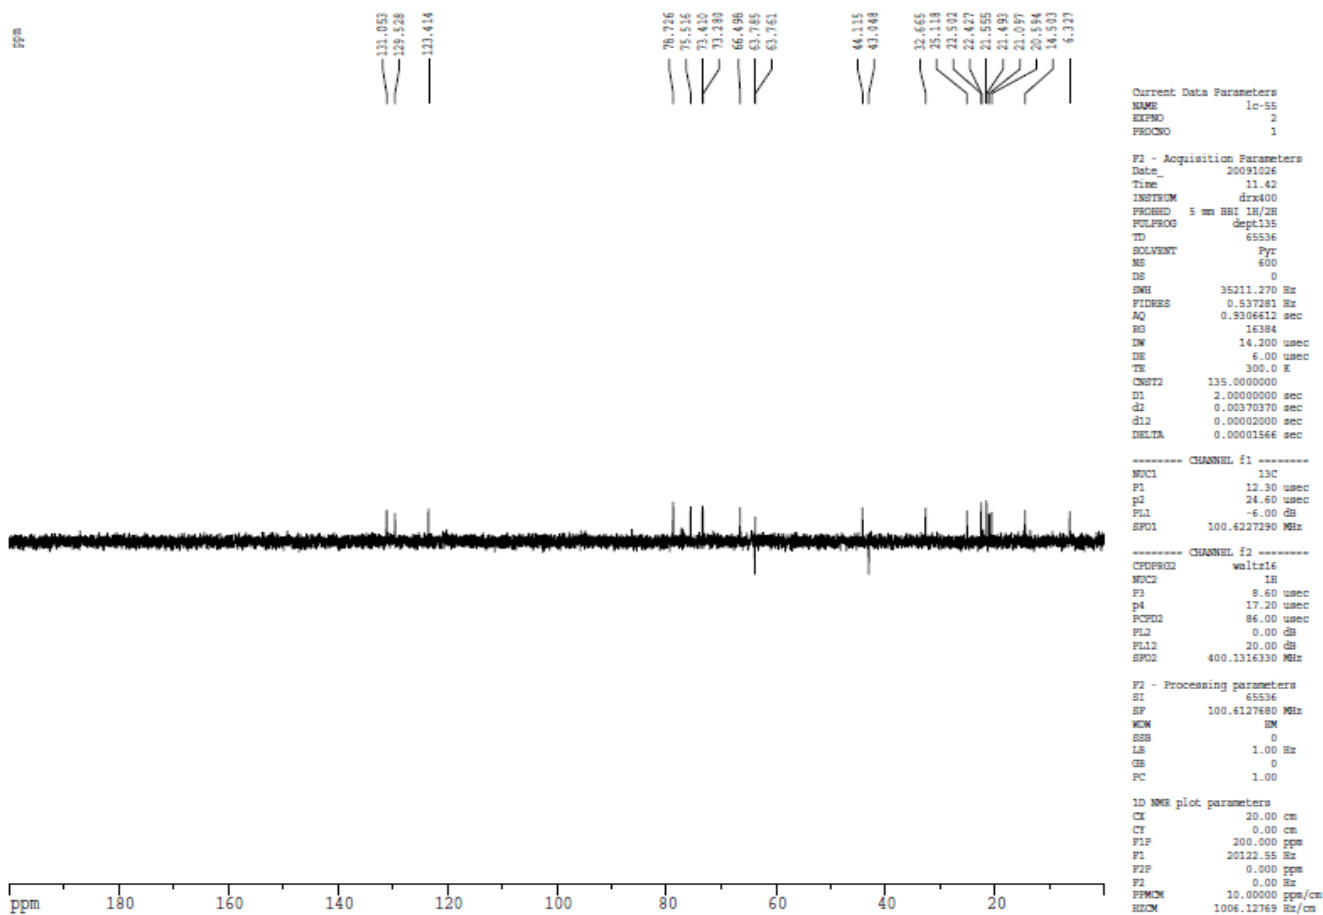

Figure S133. HSQC spectrum of the new compound 17.

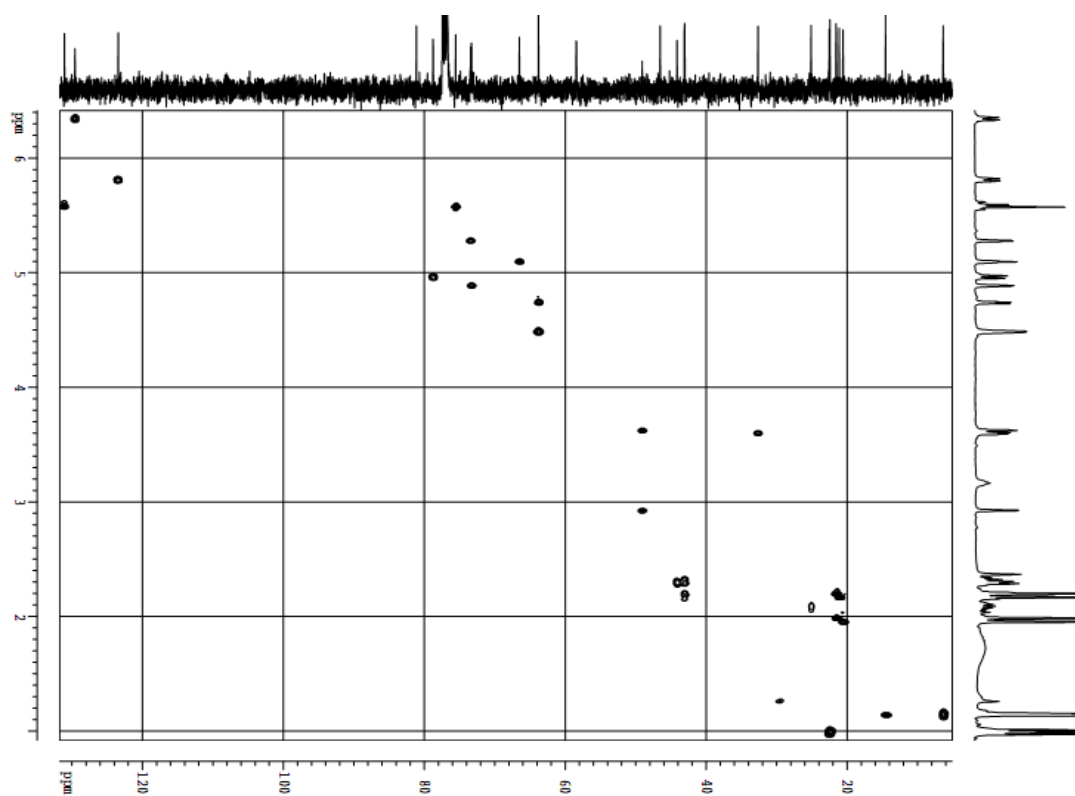Figure S134.  $^1\text{H}$ - $^1\text{H}$  COSY spectrum of the new compound 17.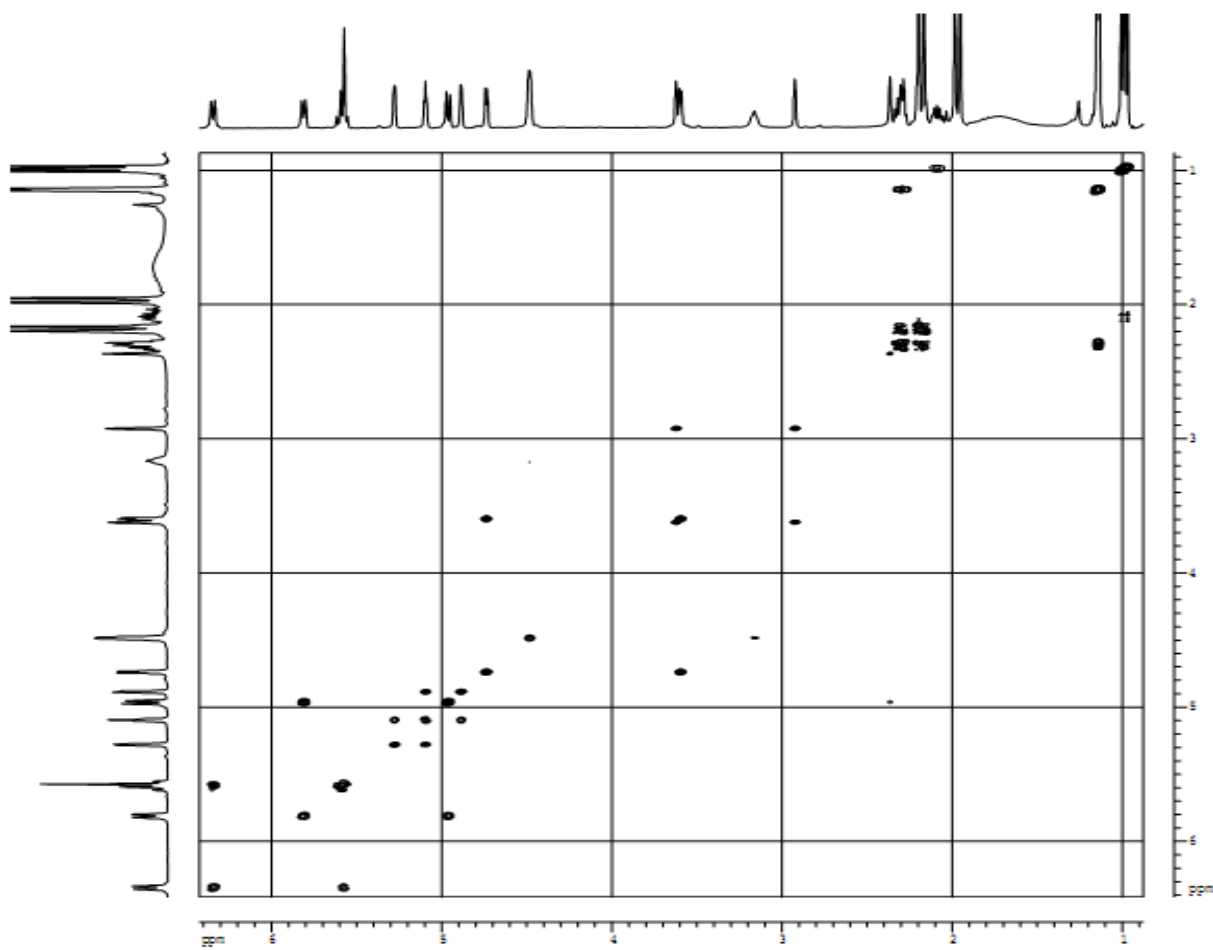

Figure S135. HMBC spectrum of the new compound 17.

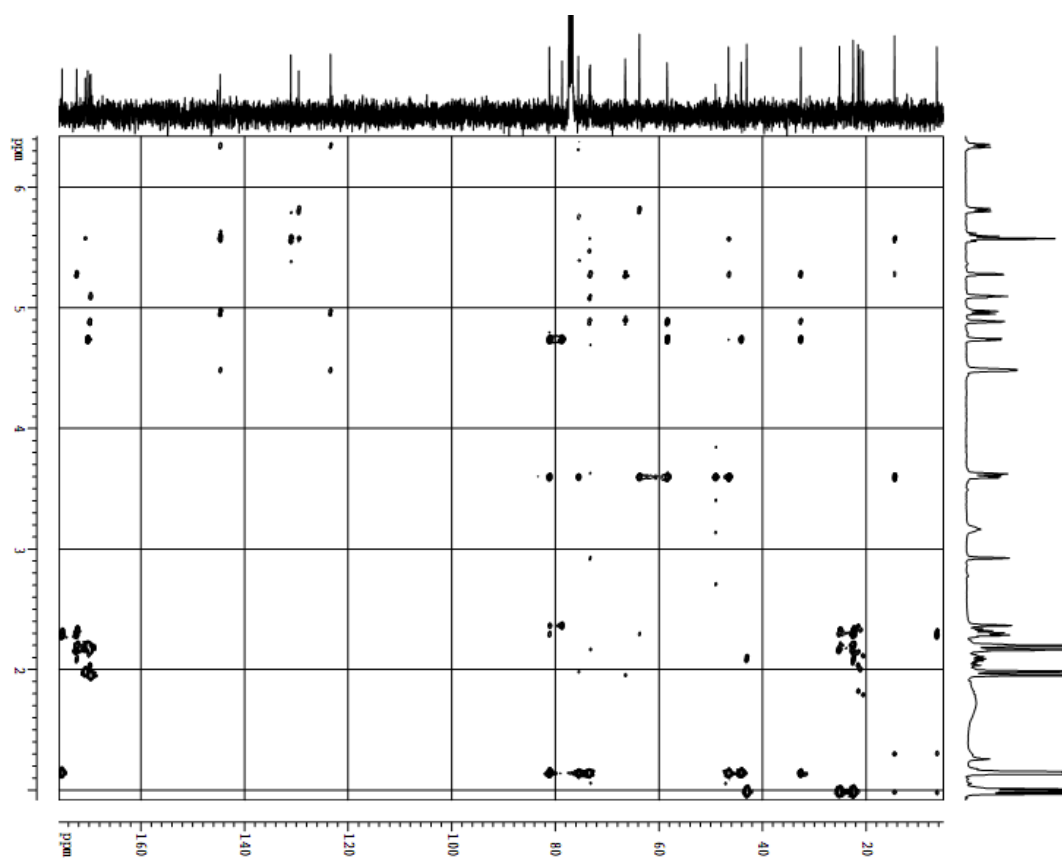

Figure S136. NOESY spectrum of the new compound 17.

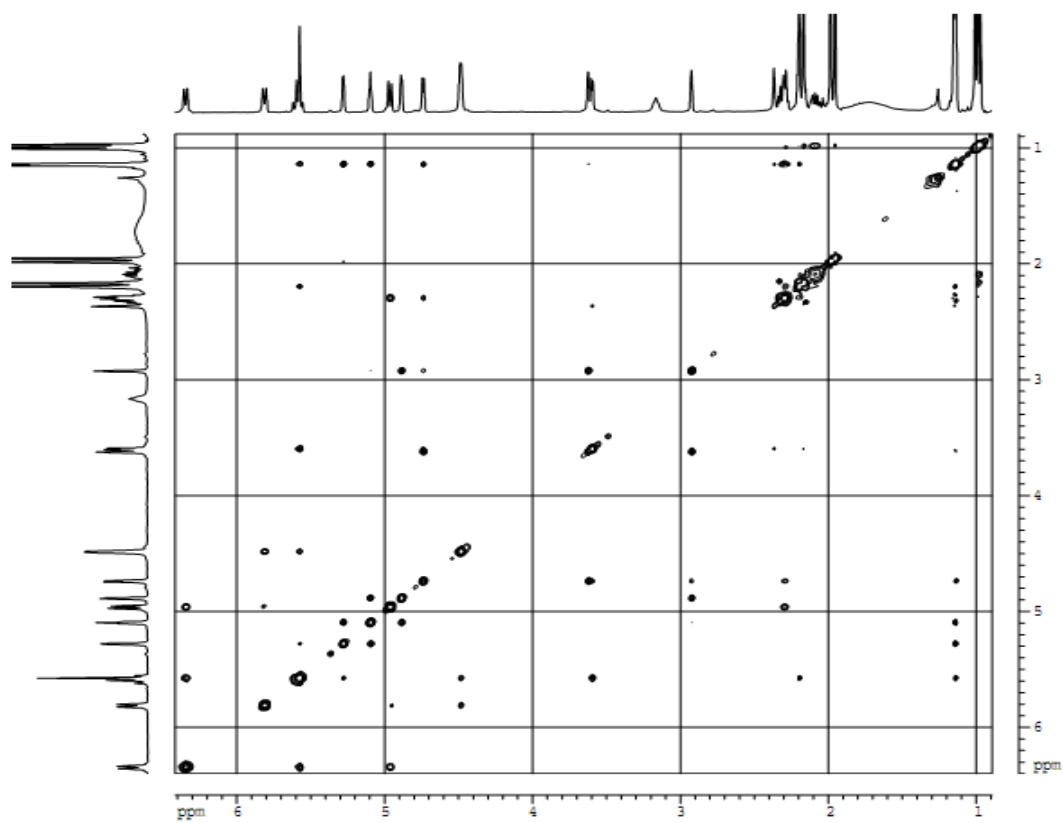



Figure S137. HR-ESIMS spectrum of the new compound 18.

Tolerance = 7.0 PPM / DBE: min = -1.5, max = 50.0  
 Selected filters: None

Monoisotopic Mass, Even Electron Ions  
 20 formula(e) evaluated with 1 results within limits (up to 50 closest results for each mass)

Elements Used:

C: 15-38 H: 10-50 O: 2-17 Na: 1-1

SIPI

LC-19 C35H46O16=722

Q100616H2 14 (0.484) AM (Med,6, Ar,5000.0,748.48,0.70); Sm (SG, 2x3.00); Cm (1:17)

Q-ToF micro  
 YA019

06-Apr-2010, 17:00:12

0.00000000

TOF MS ES+

4.70e5

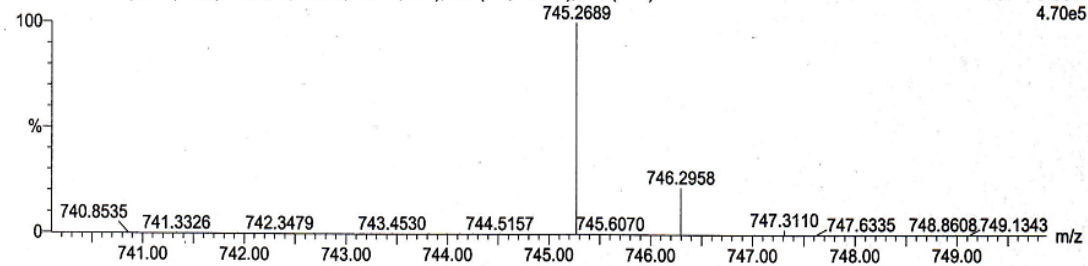

Minimum: 30.00  
 Maximum: 100.00

| Mass     | RA     | Calc. Mass | mDa | PPM | DBE  | i-FIT   | Formula        |
|----------|--------|------------|-----|-----|------|---------|----------------|
| 745.2689 | 100.00 | 745.2684   | 0.5 | 0.7 | 12.5 | 58154.2 | C35 H46 O16 Na |

Figure S138. <sup>1</sup>H NMR spectrum of the new compound 18.

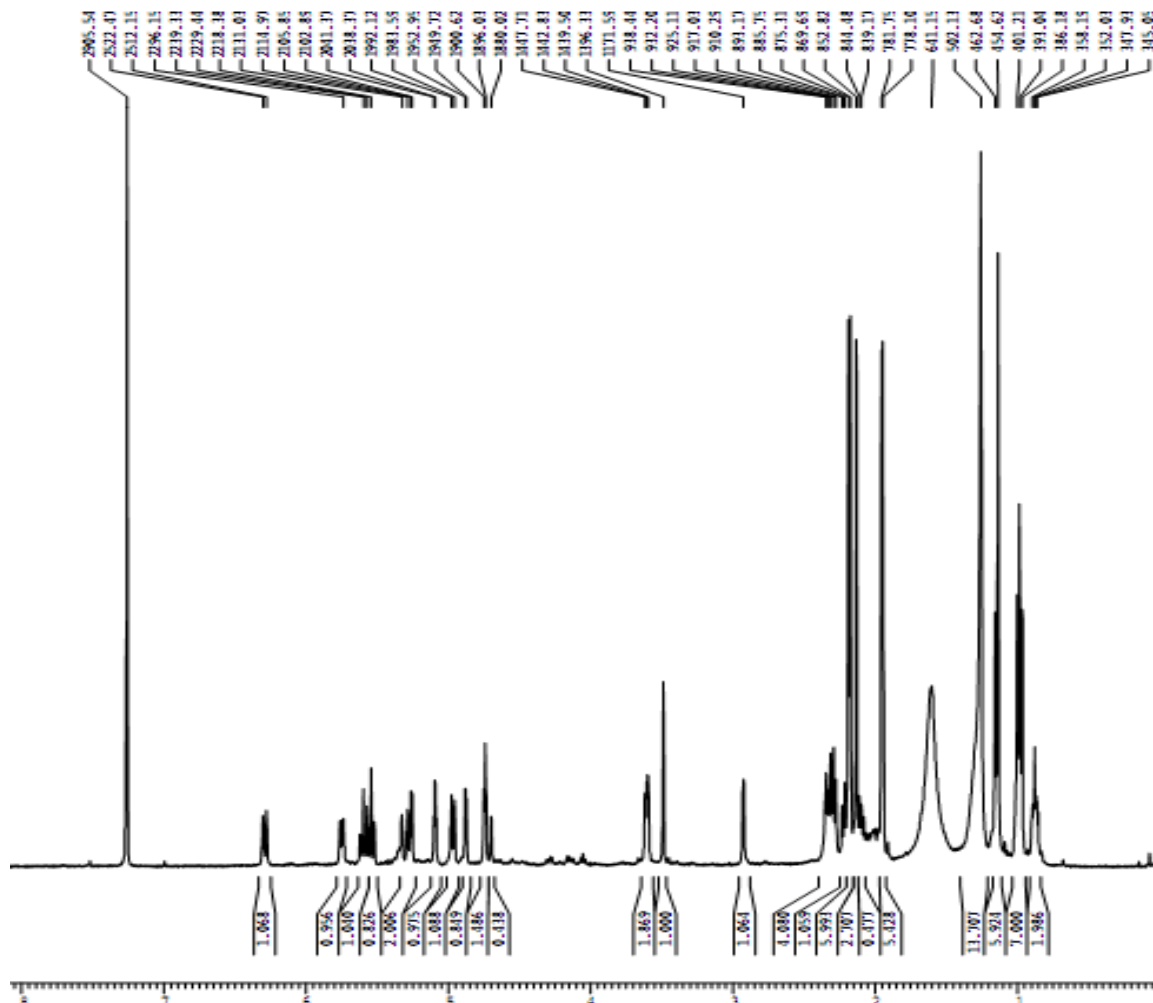

Figure S139. <sup>13</sup>C NMR spectrum of the new compound 18.

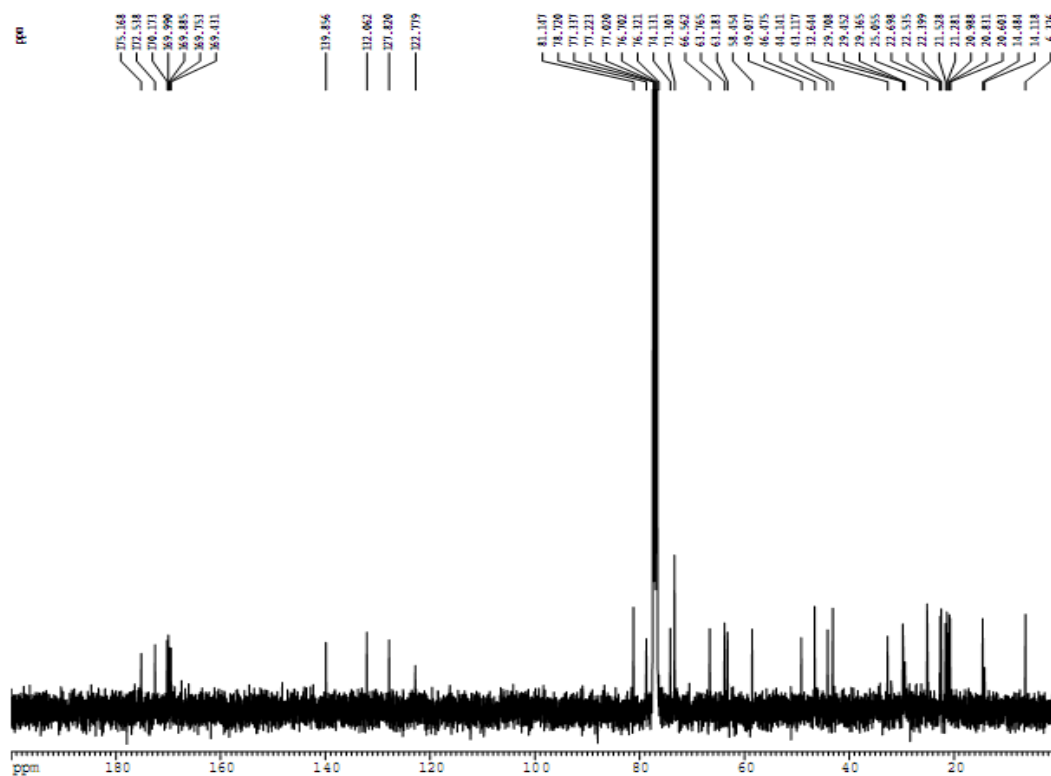

Figure S140. DEPT spectrum of the new compound 18.

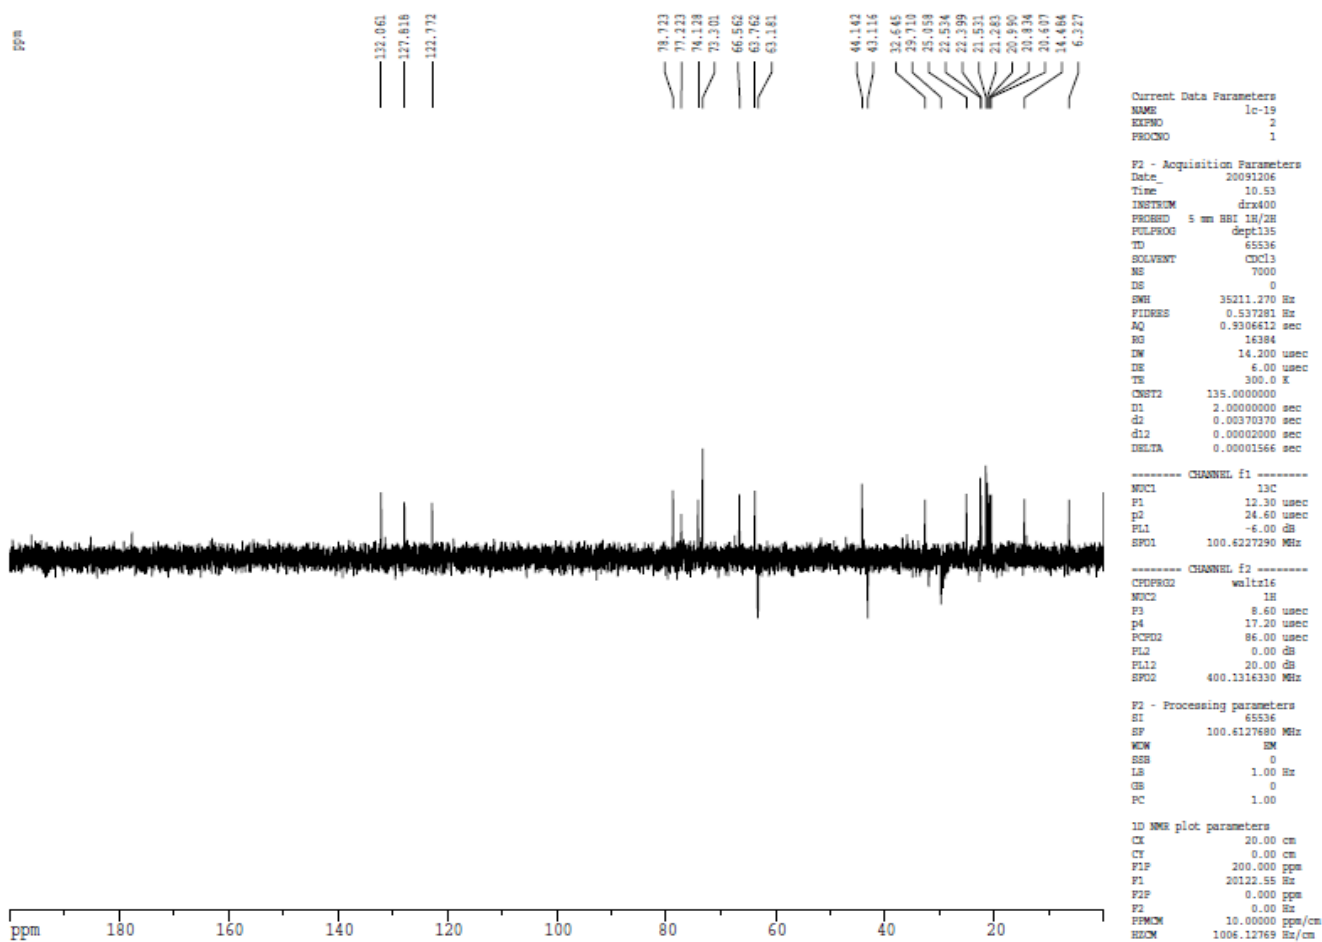

Figure S141. HSQC spectrum of the new compound 18.

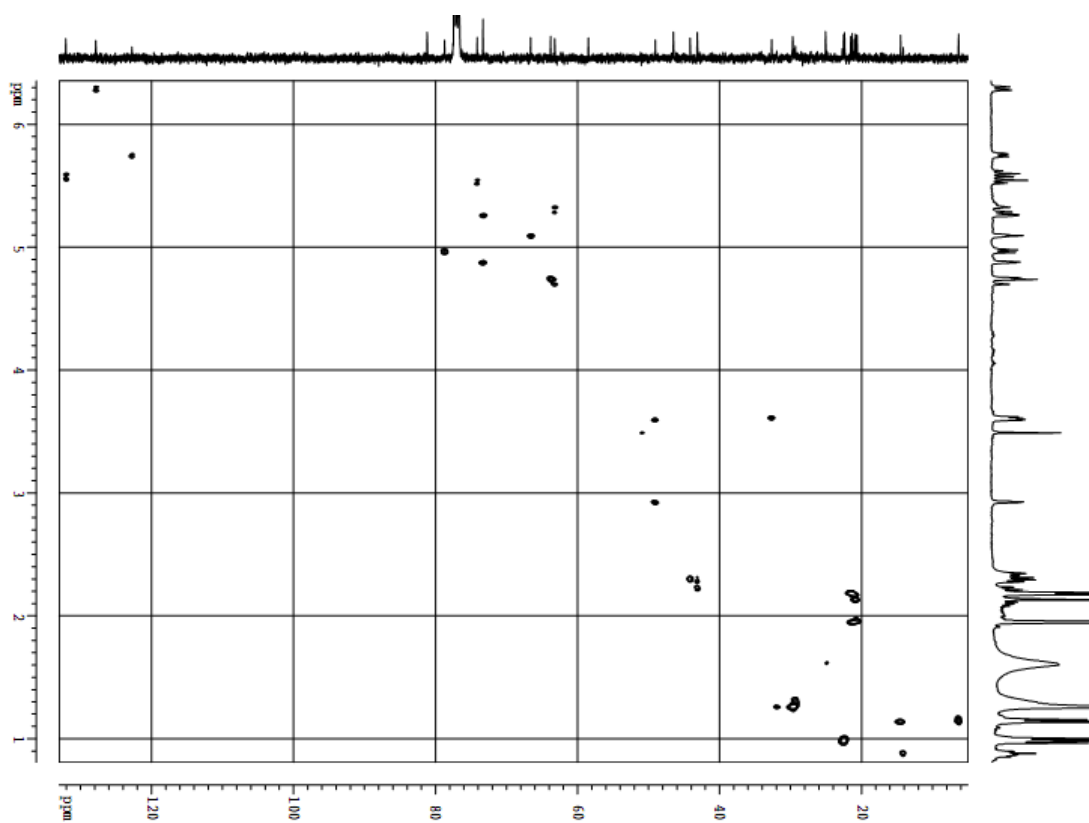Figure S142.  $^1\text{H}$ - $^1\text{H}$  COSY spectrum of the new compound 18.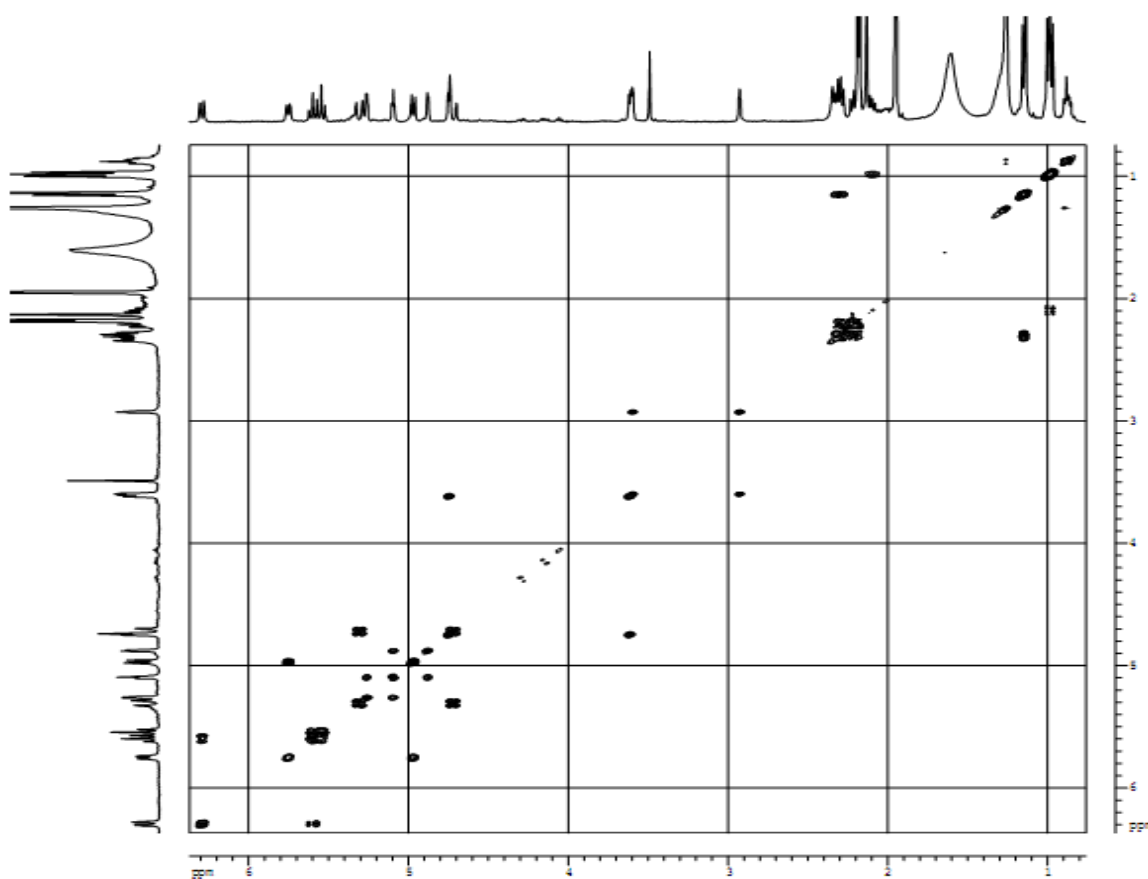

**Figure S143.** HMBC spectrum of the new compound 18.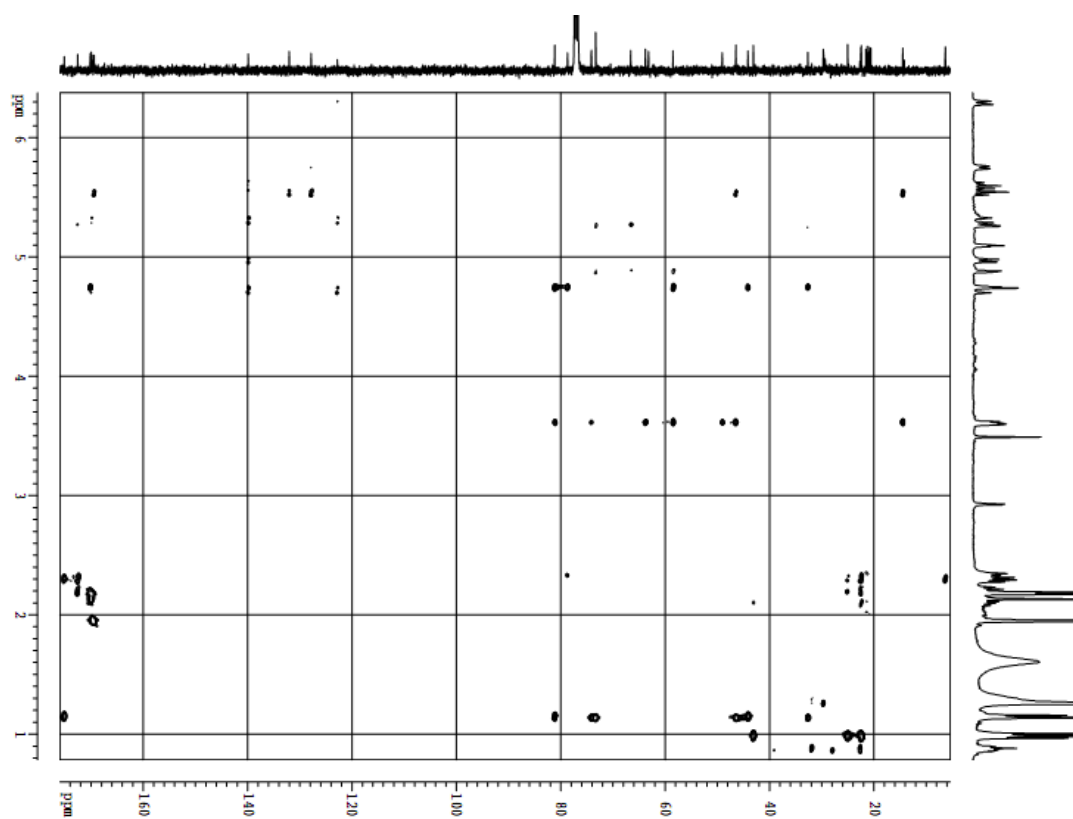**Figure S144.** NOESY spectrum of the new compound 18.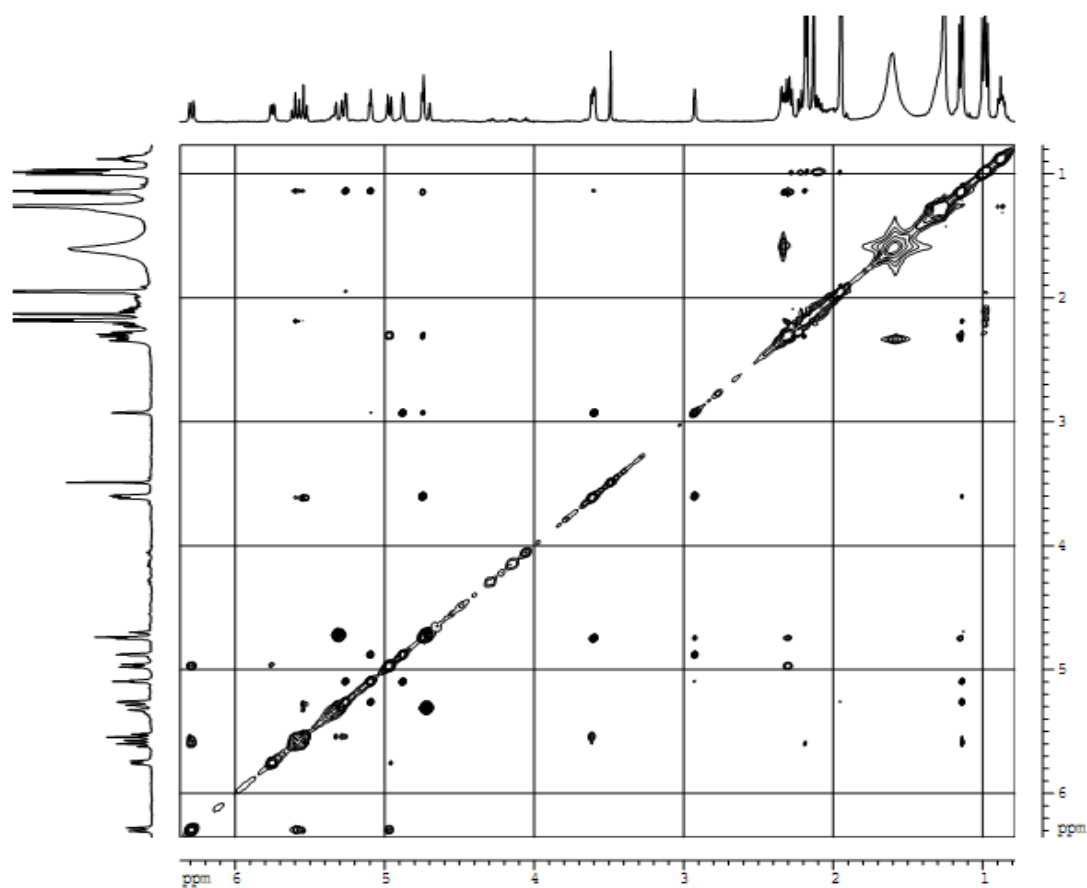

Supplement: marinedrugs-11-01565-s001.pdf [file marinedrugs-11-01565-s001.pdf]
