# Supplementary material
Source: MDPI journal article supplement (https://www.mdpi.com/1660-3397/11/5/1565)
Supplement: s2 [file s2]

  Chem3D Core 12.006181417253D

 87 90  0  0  0  0  0  0  0  0999 V2000
   -2.0038   -0.3604    2.9682 C   0  0  1  0  0  0  0  0  0  0  0  0
   -3.1448    0.1304    1.9648 C   0  0  2  0  0  0  0  0  0  0  0  0
   -0.5307    0.1206    2.9134 C   0  0  2  0  0  0  0  0  0  0  0  0
    0.5624   -0.5802    2.0841 C   0  0  0  0  0  0  0  0  0  0  0  0
    0.4530   -1.4267    1.0392 C   0  0  0  0  0  0  0  0  0  0  0  0
   -0.7722   -1.5744    0.5373 C   0  0  0  0  0  0  0  0  0  0  0  0
   -1.3849   -2.3015   -0.3964 C   0  0  0  0  0  0  0  0  0  0  0  0
   -2.8418   -1.9218   -0.6406 C   0  0  1  0  0  0  0  0  0  0  0  0
   -2.9487   -0.3771   -0.8778 C   0  0  2  0  0  0  0  0  0  0  0  0
   -3.0167    0.5317    0.4274 C   0  0  2  0  0  0  0  0  0  0  0  0
   -4.2055    0.0286   -1.7192 C   0  0  2  0  0  0  0  0  0  0  0  0
   -4.4504    1.5736   -1.8401 C   0  0  2  0  0  0  0  0  0  0  0  0
   -3.4188    2.5402   -1.1721 C   0  0  2  0  0  0  0  0  0  0  0  0
   -2.6136    1.9274   -0.0146 C   0  0  2  0  0  0  0  0  0  0  0  0
   -2.3319   -0.0144    4.4483 C   0  0  2  0  0  0  0  0  0  0  0  0
   -1.0099   -0.1463    5.1627 C   0  0  0  0  0  0  0  0  0  0  0  0
   -0.0416    0.0260    4.2415 O   0  0  0  0  0  0  0  0  0  0  0  0
   -0.8240   -0.3307    6.3455 O   0  0  0  0  0  0  0  0  0  0  0  0
   -3.4434   -0.8301    5.1246 C   0  0  0  0  0  0  0  0  0  0  0  0
    1.6481   -2.1073    0.4149 C   0  0  0  0  0  0  0  0  0  0  0  0
   -1.9678   -1.7745    2.9633 O   0  0  0  0  0  0  0  0  0  0  0  0
   -1.7511   -0.0362   -1.8276 C   0  0  0  0  0  0  0  0  0  0  0  0
   -4.1172    0.7515    0.3882 H   0  0  0  0  0  0  0  0  0  0  0  0
   -1.2371    2.3174    0.1262 C   0  0  0  0  0  0  0  0  0  0  0  0
   -2.0470    2.9213    1.0999 O   0  0  0  0  0  0  0  0  0  0  0  0
   -5.3004   -0.6337   -1.1349 O   0  0  0  0  0  0  0  0  0  0  0  0
   -7.2270   -1.7891   -1.2881 O   0  0  0  0  0  0  0  0  0  0  0  0
   -6.3481   -1.1562   -1.8342 C   0  0  0  0  0  0  0  0  0  0  0  0
   -6.3675   -0.9122   -3.3319 C   0  0  0  0  0  0  0  0  0  0  0  0
   -3.3773   -2.6430   -1.7280 O   0  0  0  0  0  0  0  0  0  0  0  0
   -3.6643   -3.9573   -1.5106 C   0  0  0  0  0  0  0  0  0  0  0  0
   -3.3601   -4.5645   -0.5080 O   0  0  0  0  0  0  0  0  0  0  0  0
   -4.4956   -4.5034   -2.6611 C   0  0  0  0  0  0  0  0  0  0  0  0
   -4.5522   -5.9240   -2.6522 O   0  0  0  0  0  0  0  0  0  0  0  0
   -4.0748    3.7172   -0.7459 O   0  0  0  0  0  0  0  0  0  0  0  0
   -4.2287    5.9577   -0.5405 O   0  0  0  0  0  0  0  0  0  0  0  0
   -3.6676    4.9933   -1.0173 C   0  0  0  0  0  0  0  0  0  0  0  0
   -2.5498    5.1781   -2.0289 C   0  0  0  0  0  0  0  0  0  0  0  0
   -3.8078    1.2180    2.5776 O   0  0  0  0  0  0  0  0  0  0  0  0
   -5.6042    2.2386    3.4677 O   0  0  0  0  0  0  0  0  0  0  0  0
   -5.1446    1.2978    2.8543 C   0  0  0  0  0  0  0  0  0  0  0  0
   -6.0536    0.1911    2.3467 C   0  0  0  0  0  0  0  0  0  0  0  0
    2.0573   -1.3442   -0.7065 O   0  0  0  0  0  0  0  0  0  0  0  0
    3.2009   -1.8778   -1.3357 C   0  0  0  0  0  0  0  0  0  0  0  0
   -5.7553    1.8572   -1.4011 O   0  0  0  0  0  0  0  0  0  0  0  0
   -7.6967    2.9949   -1.5217 O   0  0  0  0  0  0  0  0  0  0  0  0
   -6.6003    2.7590   -1.9846 C   0  0  0  0  0  0  0  0  0  0  0  0
   -6.1484    3.4015   -3.2855 C   0  0  0  0  0  0  0  0  0  0  0  0
   -3.8459   -0.7372    1.9832 H   0  0  0  0  0  0  0  0  0  0  0  0
   -0.5227    1.2074    2.6702 H   0  0  0  0  0  0  0  0  0  0  0  0
    1.5907   -0.3818    2.4370 H   0  0  0  0  0  0  0  0  0  0  0  0
   -1.4756   -0.8851    0.9718 H   0  0  0  0  0  0  0  0  0  0  0  0
   -0.8706   -3.0588   -1.0043 H   0  0  0  0  0  0  0  0  0  0  0  0
   -3.4527   -2.1727    0.2578 H   0  0  0  0  0  0  0  0  0  0  0  0
   -4.0414   -0.3946   -2.7366 H   0  0  0  0  0  0  0  0  0  0  0  0
   -4.4012    1.7686   -2.9374 H   0  0  0  0  0  0  0  0  0  0  0  0
   -2.6869    2.7989   -1.9658 H   0  0  0  0  0  0  0  0  0  0  0  0
   -2.5341    1.0747    4.5937 H   0  0  0  0  0  0  0  0  0  0  0  0
   -3.6583   -0.4447    6.1475 H   0  0  0  0  0  0  0  0  0  0  0  0
   -4.3939   -0.7796    4.5532 H   0  0  0  0  0  0  0  0  0  0  0  0
   -3.1755   -1.9047    5.2339 H   0  0  0  0  0  0  0  0  0  0  0  0
    2.4868   -2.1764    1.1434 H   0  0  0  0  0  0  0  0  0  0  0  0
    1.3823   -3.1375    0.0880 H   0  0  0  0  0  0  0  0  0  0  0  0
   -1.1096   -2.1112    2.6959 H   0  0  0  0  0  0  0  0  0  0  0  0
   -1.8691    0.9023   -2.4034 H   0  0  0  0  0  0  0  0  0  0  0  0
   -0.7726    0.0580   -1.3132 H   0  0  0  0  0  0  0  0  0  0  0  0
   -1.6275   -0.8095   -2.6194 H   0  0  0  0  0  0  0  0  0  0  0  0
   -0.8031    3.0756   -0.5199 H   0  0  0  0  0  0  0  0  0  0  0  0
   -0.5370    1.6149    0.5659 H   0  0  0  0  0  0  0  0  0  0  0  0
   -5.6036   -1.5388   -3.8448 H   0  0  0  0  0  0  0  0  0  0  0  0
   -7.3565   -1.2095   -3.7484 H   0  0  0  0  0  0  0  0  0  0  0  0
   -6.2299    0.1603   -3.5886 H   0  0  0  0  0  0  0  0  0  0  0  0
   -4.0698   -4.1942   -3.6415 H   0  0  0  0  0  0  0  0  0  0  0  0
   -5.5398   -4.1290   -2.5727 H   0  0  0  0  0  0  0  0  0  0  0  0
   -5.2075   -6.2337   -3.2811 H   0  0  0  0  0  0  0  0  0  0  0  0
   -2.3957    6.2632   -2.2269 H   0  0  0  0  0  0  0  0  0  0  0  0
   -1.5791    4.7945   -1.6491 H   0  0  0  0  0  0  0  0  0  0  0  0
   -2.8007    4.7214   -3.0124 H   0  0  0  0  0  0  0  0  0  0  0  0
   -7.1105    0.4330    2.6009 H   0  0  0  0  0  0  0  0  0  0  0  0
   -6.0219    0.0990    1.2414 H   0  0  0  0  0  0  0  0  0  0  0  0
   -5.8438   -0.7908    2.8228 H   0  0  0  0  0  0  0  0  0  0  0  0
    3.4492   -1.2257   -2.2030 H   0  0  0  0  0  0  0  0  0  0  0  0
    2.9914   -2.9052   -1.7072 H   0  0  0  0  0  0  0  0  0  0  0  0
    4.0622   -1.8786   -0.6313 H   0  0  0  0  0  0  0  0  0  0  0  0
   -6.8895    4.1696   -3.6032 H   0  0  0  0  0  0  0  0  0  0  0  0
   -6.1022    2.6502   -4.1058 H   0  0  0  0  0  0  0  0  0  0  0  0
   -5.1760    3.9304   -3.1918 H   0  0  0  0  0  0  0  0  0  0  0  0
  1  2  1  0      
  1  3  1  0      
  1 15  1  0      
  1 21  1  0      
  2 10  1  0      
  2 39  1  0      
  2 49  1  0      
  3  4  1  0      
  3 17  1  0      
  3 50  1  0      
  4  5  2  0      
  4 51  1  0      
  5  6  1  0      
  5 20  1  0      
  6  7  2  0      
  6 52  1  0      
  7  8  1  0      
  7 53  1  0      
  8  9  1  0      
  8 30  1  0      
  8 54  1  0      
  9 10  1  0      
  9 11  1  0      
  9 22  1  0      
 14 10  1  0      
 10 23  1  0      
 11 12  1  0      
 11 26  1  0      
 11 55  1  0      
 12 13  1  0      
 12 45  1  0      
 12 56  1  0      
 13 14  1  0      
 13 35  1  0      
 13 57  1  0      
 14 24  1  0      
 14 25  1  0      
 15 16  1  0      
 15 19  1  0      
 15 58  1  0      
 16 17  1  0      
 16 18  2  0      
 19 59  1  0      
 19 60  1  0      
 19 61  1  0      
 20 43  1  0      
 20 62  1  0      
 20 63  1  0      
 21 64  1  0      
 22 65  1  0      
 22 66  1  0      
 22 67  1  0      
 24 25  1  0      
 24 68  1  0      
 24 69  1  0      
 26 28  1  0      
 27 28  2  0      
 28 29  1  0      
 29 70  1  0      
 29 71  1  0      
 29 72  1  0      
 30 31  1  0      
 31 32  2  0      
 31 33  1  0      
 33 34  1  0      
 33 73  1  0      
 33 74  1  0      
 34 75  1  0      
 35 37  1  0      
 36 37  2  0      
 37 38  1  0      
 38 76  1  0      
 38 77  1  0      
 38 78  1  0      
 39 41  1  0      
 40 41  2  0      
 41 42  1  0      
 42 79  1  0      
 42 80  1  0      
 42 81  1  0      
 43 44  1  0      
 44 82  1  0      
 44 83  1  0      
 44 84  1  0      
 45 47  1  0      
 46 47  2  0      
 47 48  1  0      
 48 85  1  0      
 48 86  1  0      
 48 87  1  0      
M  END
